# Supplementary material for: Transcriptomics on Social Interactions in Termites: Effects of Soldier Presence
Source: Frontiers journal article supplement (doi:10.3389/fevo.2022.924151), 2022-06-27
Supplement: Table_7.XLSX [file Table_7.XLSX]

## Sheet: TableS7_DEGs_GLM_2nd
Table S7. Differentially expressed genes (DEGs) observed by a generalized linear model (GLM) analysis (the second design explained in the text).
Gene ID	logFC.JH40	logFC.S10	logFC.Col2	logFC.Col3	logFC.Col4	logFC.JH40.S10	logCPM	LR	p_value	q_value	FBgn	Dmel
RS010594	-6.82615	-0.0666717	0.227707	0.19817	0.229295	-0.0752584	5.91605	1873.41	0	0	NA	NA
RS003134	4.54824	0.196455	-0.0741827	-0.0703313	0.405744	-0.162765	10.0019	2025.25	0	0	FBgn0010226	GstS1
RS001241	-1.29261	0.0166908	-0.0548334	-0.00976056	-0.0214277	-0.0857189	10.6064	1515.99	0	0	FBgn0000116	Argk
RS015329	-2.45188	-0.10465	0.0907388	-0.204104	-0.227763	0.0280549	10.0604	1376.98	2.33502e-294	9.09724e-291	FBgn0027508	tankyrase
RS015226	-1.97232	-0.104451	0.671299	0.287332	0.195966	0.216039	7.57505	1188.1	1.79678e-253	5.60021e-250	FBgn0027508	tankyrase
RS006659	5.56486	0.0576383	-0.309146	-0.754609	-0.294813	-0.0954142	4.88834	1173.91	2.12148e-250	5.51019e-247	NA	NA
RS010161	-2.06719	-0.320629	0.377727	-0.247534	-0.386517	0.222112	8.50846	1171.79	6.10168e-250	1.35841e-246	FBgn0030598	CG9503
RS002174	4.23879	0.444637	0.419214	0.148184	0.0190223	-0.402021	5.25701	1033.25	5.75225e-220	1.12054e-216	FBgn0260430	CG42525
RS006658	6.24717	0.2828	-0.271249	-0.601423	0.0663415	-0.243207	7.92089	1023.61	6.99297e-218	1.21087e-214	FBgn0021953	Fatp
RS014922	-3.08122	-0.371855	0.46614	0.0102976	-0.366419	0.610876	6.7635	1003.03	1.97372e-213	3.07585e-210	FBgn0011693	Pdh
RS003448	-0.026341	-0.0277006	1.84054	0.0842633	2.68406	-0.123282	7.02117	1000.66	6.42535e-213	9.10297e-210	FBgn0020309	crol
RS003788	-2.61799	0.157455	-0.486041	-0.22327	-0.3204	-0.337886	8.41313	989.647	1.55084e-210	2.01402e-207	FBgn0038095	Cyp304a1
RS000803	-1.36678	-0.119464	0.342925	0.423905	4.58545	0.342117	4.10025	987.55	4.40518e-210	5.28079e-207	FBgn0036831	CG6839
RS006415	-2.93366	-0.246108	0.349808	0.244915	0.00413478	0.257188	5.28635	965.234	2.95238e-205	3.28642e-202	FBgn0030592	CG9514
RS009864	-2.68805	0.329887	-0.111201	0.0288424	-0.169185	-0.281423	7.71733	947.423	2.09628e-201	2.17789e-198	FBgn0031703	CG12512
RS014872	-3.25061	-0.094394	-0.582965	-0.370844	-0.466669	0.0449304	5.92949	935.631	7.43396e-199	7.24068e-196	FBgn0031645	CG3036
RS001412	-1.0453	-0.083395	-0.207741	-0.17805	-0.338618	0.0619897	10.6269	910.952	1.61137e-193	1.47715e-190	FBgn0000261	Cat
RS009380	3.24004	0.0347643	-0.288134	-0.0987028	0.192809	0.331729	6.92439	905.634	2.27401e-192	1.96878e-189	FBgn0030574	CG9413
RS007081	-3.01331	-0.080911	0.760414	0.388483	0.355808	0.435156	4.51728	869.169	1.73549e-184	1.42347e-181	FBgn0085404	CG34375
RS007322	-3.36086	-0.141498	0.301802	0.00525364	-0.132582	0.369395	5.969	845.869	1.88575e-179	1.46938e-176	FBgn0039203	CG13618
RS014812	-2.65617	-0.451094	0.0869336	-0.834341	-1.46093	0.854052	5.7821	836.778	1.73835e-177	1.29002e-174	FBgn0039203	CG13618
RS000802	-1.58093	-0.158128	0.222162	0.916295	4.17911	0.0986426	4.18574	822	2.71469e-174	1.92299e-171	FBgn0036321	CG14120
RS008849	3.11774	0.038486	0.45346	-0.560387	-0.579197	-0.138843	4.93723	817.961	2.02549e-173	1.3724e-170	FBgn0037972	CG10005
RS011734	-5.39872	-0.226868	0.516785	0.633054	0.213423	1.19322	3.51786	816.058	5.22022e-173	3.38966e-170	FBgn0030598	CG9503
RS008477	1.35123	-0.169717	-0.0957727	-0.0776942	-0.184587	0.124548	7.51934	804.49	1.64962e-170	1.02831e-167	FBgn0036125	CG6279
RS001896	-2.49249	-0.11874	-0.419127	0.0904837	-0.479479	-0.0817448	8.52982	792.843	5.41885e-168	3.24797e-165	FBgn0038126	CG8483
RS004000	-2.92654	-0.128498	-0.485084	-0.415502	-0.630876	0.24065	7.30455	778.577	6.54461e-165	3.77745e-162	FBgn0037665	St2
RS003432	-2.00936	0.00378409	0.733339	0.552707	0.571206	0.0373531	8.38222	771.882	1.82932e-163	1.01814e-160	FBgn0261788	Ank2
RS007343	4.37153	0.31437	1.29967	0.605063	0.369975	0.0637963	6.5889	750.965	6.03141e-159	3.24115e-156	FBgn0033763	CG8646
RS000815	-2.14568	-0.11799	-0.00407551	0.135724	0.0473597	0.298614	7.75451	740.079	1.35423e-156	7.03478e-154	FBgn0033302	Cyp6a14
RS013686	-1.31963	-0.0671224	-0.273596	0.395927	0.129447	0.0992086	9.09438	721.566	1.34818e-152	6.77743e-150	FBgn0043043	desat2
RS014293	-2.58177	-0.0430982	-0.410874	-0.647608	-0.866631	-0.0602282	4.38509	715.723	2.46353e-151	1.19974e-148	FBgn0033753	Cyp301a1
RS010614	5.07735	-0.911554	0.43927	-0.0377358	0.697077	1.65849	3.27383	715.296	3.0464e-151	1.43864e-148	FBgn0003961	Uro
RS011688	-3.87058	0.0745952	0.152219	0.433231	-0.0194145	0.507933	6.56205	710.714	2.97243e-150	1.36242e-147	FBgn0037323	CG2663
RS007425	-3.74913	0.00332554	1.14219	1.53764	1.78054	0.446784	5.61686	688.272	2.08202e-145	9.27034e-143	NA	NA
RS015220	-2.25848	-0.205223	0.0994268	0.0382833	0.0257917	0.552317	5.47541	674.336	2.12377e-142	9.19358e-140	FBgn0025454	Cyp6g1
RS002842	-1.83106	-0.0471844	0.419159	0.10427	0.478823	-0.0196519	9.44812	662.61	7.21282e-140	3.03796e-137	FBgn0027508	tankyrase
RS011735	-1.97788	0.00358905	-0.319898	-0.336531	-0.551689	-0.0339225	9.22836	646.349	2.33138e-136	9.56112e-134	NA	NA
RS013912	4.60449	0.29823	0.728089	0.419683	1.16445	0.270846	8.46009	634.871	6.98935e-134	2.79287e-131	NA	NA
RS008824	3.90271	0.0625377	0.98477	0.594673	0.788718	0.267623	7.04864	627.591	2.60197e-132	1.01373e-129	NA	NA
RS008852	1.8341	-0.270968	0.153245	-0.162065	-0.274703	0.440966	5.92251	623.524	1.96327e-131	7.46235e-129	FBgn0025454	Cyp6g1
RS014484	-1.7481	-0.119276	0.144286	0.123765	0.0973515	0.326293	8.94212	620.479	8.91063e-131	3.30627e-128	FBgn0025454	Cyp6g1
RS004146	-2.4901	-0.0452863	-0.128085	-0.314373	-0.385659	0.381563	8.62185	605.306	1.67155e-127	6.05799e-125	FBgn0036659	CG9701
RS000041	1.24656	0.0720791	0.0211084	0.188669	0.398117	0.293425	8.50339	600.651	1.68823e-126	5.97941e-124	FBgn0036262	CG6910
RS007282	-1.60532	0.04039	0.234781	0.0136808	-0.023254	-0.113689	8.13189	593.521	5.82516e-125	2.01732e-122	FBgn0035726	CG9953
RS015228	-1.94211	-0.054756	0.215605	-0.18282	0.0354164	0.146173	7.49133	591.498	1.59084e-124	5.3895e-122	FBgn0043884	mask
RS015366	6.64479	-0.959282	-0.901012	-0.26535	-0.611913	0.552975	2.82139	586.536	1.86955e-123	6.19896e-121	NA	NA
RS005485	-2.19292	-0.197359	0.0285259	0.0043893	-0.104438	0.281715	6.8353	576.689	2.48589e-121	8.07086e-119	FBgn0033204	CG2065
RS009745	7.57877	0.0300753	0.863788	0.61554	0.37015	0.0886724	8.47854	572.836	1.6835e-120	5.3542e-118	FBgn0039768	CG15533
RS009268	-1.83455	-0.0450612	0.482569	-0.0852339	0.103224	0.177913	9.17628	571.677	2.99313e-120	9.32898e-118	FBgn0015391	glu
RS015328	-1.5786	-0.0300536	-0.113383	-0.465466	0.195615	-0.0942719	6.41508	566.701	3.54012e-119	1.08175e-116	FBgn0027508	tankyrase
RS000936	-1.81306	-0.325859	0.30273	0.274626	0.138649	0.375461	6.2647	565.38	6.82123e-119	2.04427e-116	FBgn0039203	CG13618
RS013977	8.86583	0.322735	1.63093	1.30437	0.997858	-0.206867	5.01156	562.411	2.97913e-118	8.75977e-116	NA	NA
RS012637	-0.943831	-0.0969083	-0.241331	-0.111274	-0.215063	0.14681	8.59106	560.49	7.73075e-118	2.23104e-115	FBgn0016031	lama
RS011875	-1.23101	-0.142205	-0.717859	-1.1285	-1.22417	-0.275802	7.39268	557.521	3.3763e-117	9.5666e-115	FBgn0000473	Cyp6a2
RS007861	-2.18151	0.1281	-0.0355514	-0.631755	-1.71151	-0.528785	3.94927	557.421	3.54859e-117	9.87522e-115	FBgn0028841	jhamt
RS011715	0.828222	0.0625045	-0.764402	-0.988118	-0.973036	-0.0144125	10.7065	554.779	1.31697e-116	3.60065e-114	FBgn0030590	CG9518
RS008574	1.38154	0.0416511	-0.284911	-0.161414	-0.210024	-0.0137805	8.04401	553.07	3.07573e-116	8.26417e-114	FBgn0001124	Got1
RS014594	-1.86249	-0.493539	0.502475	-0.125068	-0.338545	0.296045	7.58977	545.432	1.36301e-114	3.6002e-112	FBgn0036618	Cpr72Eb
RS013682	-2.41132	0.299008	-0.207036	1.74407e-05	-0.316185	0.0209385	6.29222	543.2	4.12625e-114	1.07172e-111	FBgn0029798	CG4078
RS014587	-1.8074	0.092633	-0.95699	-0.893698	-1.04418	-0.466281	6.22221	540.991	1.23508e-113	3.15533e-111	FBgn0034660	lox2
RS003820	-3.19351	-0.514981	1.09151	0.833792	1.19464	0.747335	3.67212	539.034	3.26344e-113	8.20282e-111	FBgn0052133	ptip
RS013098	-2.60727	-0.0573611	-0.200494	0.0318187	0.0720219	0.275402	6.78952	536.032	1.44795e-112	3.58173e-110	FBgn0038349	CG6045
RS002529	0.954753	-0.160114	-1.96073	-1.6976	-1.31054	0.251769	9.41327	535.572	1.81923e-112	4.42984e-110	FBgn0040817	CG14132
RS003276	-2.96302	-0.0821917	0.327639	0.605167	0.643426	0.287562	5.08972	534.642	2.88625e-112	6.91989e-110	FBgn0031800	CG9497
RS014933	-2.24947	0.0214822	-0.0436652	-0.166746	-0.22932	-0.0970346	5.84456	532.845	7.03861e-112	1.66196e-109	FBgn0038095	Cyp304a1
RS001216	-1.78005	-0.0751315	0.442058	-0.243053	0.185075	0.120313	10.4076	529.421	3.85034e-111	8.95577e-109	FBgn0027508	tankyrase
RS011061	2.54705	-0.158524	-0.161996	-0.204845	-0.0258765	0.252202	3.96553	527.518	9.89986e-111	2.26882e-108	FBgn0051324	CG31324
RS015462	-1.4056	-0.0274652	0.278072	0.220902	0.0397102	0.135438	8.17749	524.576	4.26242e-110	9.62689e-108	FBgn0261955	kdn
RS006303	-3.03163	-0.0828582	0.435831	0.349516	0.0774312	-0.383287	3.95181	523.06	9.04104e-110	2.01279e-107	FBgn0011555	thetaTry
RS002191	3.60332	0.566832	1.03244	0.441899	1.07911	-0.180203	7.93691	519.704	4.78068e-109	1.04932e-106	FBgn0029690	CG6414
RS006301	-2.30341	-0.258555	0.533938	0.524754	0.469861	-0.0622638	4.29715	517.521	1.41182e-108	3.0558e-106	FBgn0051954	CG31954
RS008443	-2.75206	0.0691471	0.450687	0.178484	0.306403	-0.460092	4.7543	517.385	1.51054e-108	3.22468e-106	FBgn0034045	CG8249
RS002550	-1.39259	0.218517	0.135621	0.175651	0.106319	-0.0977291	7.64892	515.609	3.64632e-108	7.67895e-106	FBgn0010435	emp
RS010906	-2.46046	-0.0474621	0.177072	-0.0411588	-0.209905	0.0854296	4.57824	515.173	4.52673e-108	9.40594e-106	FBgn0005626	ple
RS011736	-1.38503	0.072272	0.0688492	0.0456267	-0.0138887	-0.0769156	12.1971	515.139	4.60492e-108	9.4425e-106	NA	NA
RS007982	-2.55954	0.0101422	0.197864	0.157116	0.0300658	0.0492845	5.49905	512.04	2.14163e-107	4.33444e-105	NA	NA
RS010709	-2.39782	-0.250601	-0.48647	-0.731338	-0.562147	0.168985	6.97008	511.587	2.68157e-107	5.35765e-105	FBgn0039151	CG13607
RS015223	-2.04729	-0.186585	1.44248	0.648077	0.374182	0.252319	5.76351	511.346	3.02231e-107	5.96199e-105	FBgn0027508	tankyrase
RS000844	-1.63675	0.00850366	0.138177	-0.141013	0.259262	0.0101883	7.00002	498.481	1.78601e-104	3.47914e-102	FBgn0261554	CG42672
RS012439	-1.38871	-0.136272	0.196925	0.455817	0.309033	0.184516	7.89093	493.101	2.57487e-103	4.95392e-101	FBgn0036659	CG9701
RS001763	-1.86308	-0.189846	-0.326831	-0.252309	-0.256751	-0.214907	7.61511	489.94	1.23481e-102	2.34675e-100	FBgn0030332	CG9360
RS001626	-1.66883	-0.0347124	-0.217031	0.00740758	-0.205446	0.124738	9.37403	489.233	1.75377e-102	3.29287e-100	FBgn0039203	CG13618
RS007468	1.41585	0.0292103	-0.289254	-0.498044	-0.462594	-0.0502312	9.66586	484.803	1.57777e-101	2.92714e-99	FBgn0051075	CG31075
RS001968	-1.64969	-0.157896	0.177131	0.202706	-0.108928	0.155181	9.32917	484.308	2.01623e-101	3.69659e-99	FBgn0033883	CG16935
RS015365	5.44922	-0.597876	-0.522231	-0.0207486	-0.651801	0.504282	2.63305	479.248	2.47904e-100	4.49225e-98	NA	NA
RS001403	-2.70542	-0.282301	0.0174169	-0.0333363	-0.194012	0.20674	4.71644	478.135	4.30518e-100	7.71172e-98	FBgn0029898	CG14439
RS001233	-2.18196	0.096884	-0.147872	-0.0801481	-0.433877	-0.0559491	6.44337	476.393	1.02085e-99	1.80784e-97	FBgn0027844	CAH1
RS013220	-0.1661	0.174019	3.91853	0.310193	0.0324156	-0.561584	2.53123	476.323	1.05706e-99	1.85092e-97	FBgn0050048	CG30048
RS013610	-2.26012	-0.212655	0.390805	0.2794	-0.0480472	0.446968	5.46205	470.927	1.53437e-98	2.65685e-96	FBgn0030598	CG9503
RS000845	-1.53102	0.0662558	0.133838	-0.40055	-0.261782	-0.00796343	5.25573	469.906	2.5456e-98	4.35941e-96	FBgn0027508	tankyrase
RS007832	1.76554	0.0856637	-0.035923	-0.220306	-0.250272	0.0923299	6.13126	465.636	2.11417e-97	3.58122e-95	FBgn0052446	Atox1
RS007428	-4.02015	0.0487183	0.956698	1.61348	1.71882	0.49402	6.53496	463.611	5.76989e-97	9.6686e-95	NA	NA
RS002760	1.10615	-0.133045	0.179642	-0.0326097	0.236736	0.186609	6.38334	458.698	6.58721e-96	1.09207e-93	FBgn0036463	Reck
RS014292	-1.58997	-0.0634621	-0.228669	-0.343673	-0.302101	0.01327	7.74504	456.671	1.79959e-95	2.95208e-93	FBgn0033753	Cyp301a1
RS009249	0.997675	0.0325495	-0.160782	-0.014855	0.111282	0.14751	8.63902	455.68	2.9407e-95	4.77374e-93	FBgn0259736	CG42390
RS015225	-1.76293	-0.108851	0.449547	0.107614	0.175481	0.168408	4.89778	454.715	4.74355e-95	7.62098e-93	FBgn0027508	tankyrase
RS005759	8.3887	-0.0745362	5.94523	6.83361	7.46717	-3.52349	1.56945	452.969	1.12689e-94	1.79198e-92	NA	NA
RS014885	0.901415	-0.0408439	0.307652	0.343534	0.365474	0.191064	8.7877	450.433	3.96028e-94	6.23405e-92	FBgn0034603	Glycogenin
RS004063	1.07345	-0.0948682	0.165604	0.0756871	0.075914	0.046077	8.87553	448.323	1.12668e-93	1.75581e-91	FBgn0039562	Gp93
RS007592	-1.13232	-0.272809	0.178714	-3.26648	0.184161	0.504288	4.57493	448.178	1.21093e-93	1.86842e-91	NA	NA
RS001886	-3.05267	-0.0150122	-0.256778	-0.207657	-0.446052	0.399892	3.85221	447.569	1.63697e-93	2.50104e-91	FBgn0025697	santa-maria
RS014548	1.33921	-0.0297666	-0.827562	-0.276485	-0.257059	0.35431	5.90327	439.366	9.53662e-92	1.4429e-89	FBgn0260964	Vmat
RS000211	-2.14077	0.10131	-0.462686	-0.615323	-0.703221	-0.304646	6.35154	439.043	1.11946e-91	1.67746e-89	FBgn0033302	Cyp6a14
RS014020	0.668573	0.0940535	-0.355612	-0.244253	-0.239087	0.124985	8.30043	437.512	2.38917e-91	3.54599e-89	FBgn0000052	ade2
RS010170	-0.75904	-0.225931	-0.0322338	-0.206444	-0.295075	0.324514	10.4891	437.228	2.75086e-91	4.04428e-89	FBgn0058470	CG40470
RS007596	-0.853763	-0.117417	0.361073	-2.30789	0.167166	0.182664	6.16242	435.928	5.23853e-91	7.62964e-89	FBgn0040001	CG17374
RS007426	-3.79122	0.0505612	1.17251	1.76125	1.9697	0.333738	6.30232	435.297	7.15991e-91	1.03315e-88	NA	NA
RS009089	1.58689	-0.133796	-0.249343	-0.406851	-0.430145	0.390391	7.34694	430.127	9.27301e-90	1.32579e-87	FBgn0014427	CG11899
RS004143	2.66078	0.0958527	-0.558197	-0.768151	-0.416265	0.371056	6.32596	430.099	9.40092e-90	1.33185e-87	FBgn0036659	CG9701
RS012179	-2.1579	0.177061	-2.51803	-2.45206	-2.10034	0.303277	9.15458	429.341	1.36873e-89	1.92165e-87	FBgn0026061	Mipp1
RS000061	2.2122	0.0445985	-0.42495	-0.412062	-0.15328	-0.134426	5.77571	429.102	1.54112e-89	2.14436e-87	FBgn0259241	CG42339
RS003553	-2.45783	-0.107435	0.267848	0.132977	-0.0764719	0.213668	9.42428	428.591	1.9849e-89	2.73741e-87	FBgn0038347	CG18522
RS006135	-1.66689	-0.352156	-0.603496	2.38455	3.83053	-0.127333	3.14667	427.301	3.75999e-89	5.13997e-87	FBgn0000078	Amy-d
RS003142	-1.20759	0.0398942	0.118232	-0.165438	-0.141632	0.0809236	10.2237	424.631	1.411e-88	1.91209e-86	FBgn0014863	Mlp84B
RS010160	-1.98551	-0.384154	-2.17983	-0.41676	-0.442916	0.351356	6.26607	423.8	2.1295e-88	2.86087e-86	FBgn0030598	CG9503
RS006327	-1.85722	0.26826	0.152691	0.237725	0.183248	-0.0124395	5.77734	422.971	3.21077e-88	4.27664e-86	FBgn0003388	shd
RS001701	1.46382	-0.206015	-0.0964237	-0.0642847	-0.149706	0.344643	10.4455	421.294	7.36903e-88	9.73212e-86	FBgn0013307	Odc1
RS013665	-1.58735	-0.0492896	0.0207512	0.0531029	-0.400385	0.112261	8.11567	419.223	2.05496e-87	2.69114e-85	FBgn0033304	Cyp6a13
RS009133	-2.16275	0.132403	0.444773	0.585152	0.568174	0.278737	5.31901	416.005	1.01126e-86	1.31329e-84	FBgn0013988	Strn-Mlck
RS010570	-1.92909	-0.0593245	0.563622	0.445615	0.40094	0.327453	8.19564	408.038	5.22645e-85	6.73132e-83	FBgn0038181	CG9297
RS007637	2.38851	0.521061	-0.226405	-0.0619738	0.31712	-0.692771	6.01689	407.045	8.54703e-85	1.09178e-82	NA	NA
RS006642	-1.86723	-0.0279924	-0.227151	-0.0996457	-0.237288	-0.157157	4.57356	406.237	1.27466e-84	1.61498e-82	FBgn0000422	Ddc
RS010778	-1.58607	-0.225791	-0.0935769	-0.207849	-0.280713	0.197959	6.14474	400.341	2.36152e-83	2.9679e-81	FBgn0032264	Lip4
RS014624	-2.49554	0.035274	0.0479444	-0.164127	-0.374789	0.220454	7.04754	399.248	4.05647e-83	5.05729e-81	FBgn0038095	Cyp304a1
RS003156	-2.50882	-0.0340891	-0.612032	-0.553438	-0.520447	-0.155024	8.51636	397.535	9.4697e-83	1.17124e-80	FBgn0033302	Cyp6a14
RS000899	0.834602	-0.045547	-0.239012	-0.249133	-0.162979	0.0340214	9.39681	397.461	9.82592e-83	1.20573e-80	FBgn0033663	ERp60
RS008850	4.04484	0.23683	-0.554508	-0.492123	-0.100801	-0.00945534	8.73689	395.562	2.51476e-82	3.06172e-80	FBgn0033302	Cyp6a14
RS008448	1.54453	-0.291194	0.526916	0.409262	0.166803	0.512631	4.92953	395.259	2.9219e-82	3.52984e-80	FBgn0033644	Tret1-2
RS006480	-1.54894	-0.13347	0.578999	0.499095	0.590392	0.303503	7.74926	393.816	5.96734e-82	7.15346e-80	FBgn0050104	NT5E-2
RS008703	0.754358	-0.0469821	-0.00266389	0.037274	-0.0053072	0.071482	10.327	392.154	1.35881e-81	1.61646e-79	FBgn0005585	Crc
RS012030	3.81279	0.0782424	0.305022	0.390447	0.781413	0.0828859	3.05048	391.288	2.0852e-81	2.4618e-79	FBgn0024366	CG11409
RS001381	0.252708	0.87384	1.39803	4.03489	0.250271	-0.733099	2.50718	390.633	2.8845e-81	3.37986e-79	FBgn0033750	CG13151
RS007254	3.10098	-0.0272744	-0.342813	-0.419298	-0.514682	0.608419	7.4737	390.565	2.98234e-81	3.46842e-79	FBgn0028573	prc
RS007002	-2.22816	-0.290264	0.158029	0.152999	0.356495	0.38561	5.90041	388.64	7.73248e-81	8.92615e-79	FBgn0034605	CG15661
RS014585	-3.52901	-0.156985	0.108276	0.107166	-0.00958816	-0.00441836	2.84748	386.539	2.18751e-80	2.50663e-78	NA	NA
RS003154	-1.98949	-0.0143754	-0.560408	-0.602343	-0.491209	-0.179035	9.40054	379.4	7.48229e-79	8.51124e-77	FBgn0033302	Cyp6a14
RS007102	-1.15415	0.104933	-0.0403856	0.00710815	-0.100208	-0.0367602	6.72628	378.931	9.43477e-79	1.06545e-76	FBgn0001128	Gpdh
RS006091	-1.80294	-0.0472471	-0.0100176	0.128422	0.192037	-0.12532	6.75087	378.702	1.05704e-78	1.1851e-76	FBgn0053533	lectin-37Db
RS015450	2.55921	-0.0904544	-0.595271	-1.02716	0.0469929	-0.0729541	3.97944	377.865	1.59888e-78	1.77979e-76	FBgn0026199	myo
RS010813	7.57454	-1.6538	8.21671	7.47144	7.30991	-1.26793	2.2356	375.27	5.77213e-78	6.37963e-76	FBgn0050025	CG30025
RS001887	-2.78966	-0.55962	0.499455	0.0480351	0.0529908	0.857128	3.45533	371.946	2.98885e-77	3.28016e-75	FBgn0025697	santa-maria
RS011509	-1.45027	0.162424	-0.537529	-0.388876	-0.191038	-0.0268106	7.39392	370.472	6.19763e-77	6.75412e-75	FBgn0032603	CG17928
RS000961	-1.92722	-0.0659166	-0.317097	-0.423055	-0.105191	-0.135151	6.74641	369.994	7.85082e-77	8.49634e-75	FBgn0032264	Lip4
RS001654	1.52279	-0.456234	0.48838	-0.796552	-0.635626	0.627989	6.89878	367.631	2.5259e-76	2.71474e-74	FBgn0000261	Cat
RS006537	-2.15169	0.145679	-0.569596	-0.44195	-0.848741	-0.125827	6.14453	367.512	2.67873e-76	2.85927e-74	FBgn0029690	CG6414
RS007608	2.53022	0.0168055	0.462964	0.187234	0.338083	0.478764	9.2098	366.689	4.02547e-76	4.26754e-74	FBgn0020236	ATPCL
RS012436	-2.64715	-0.139417	0.362811	0.502617	-0.343276	0.60132	5.46591	366.504	4.41046e-76	4.6441e-74	FBgn0036659	CG9701
RS004149	-0.820407	-0.051044	-0.543821	-0.661845	-0.711145	-0.0114001	6.53866	366.037	5.55683e-76	5.81193e-74	FBgn0036659	CG9701
RS007848	0.983678	0.0319533	0.019992	0.100056	0.088205	0.0453116	7.50953	366.012	5.62415e-76	5.84311e-74	FBgn0031980	RpL36A
RS001958	-1.23914	-0.0115895	0.254868	0.143962	0.256616	0.204836	10.3439	364.466	1.20841e-75	1.24714e-73	FBgn0053519	Unc-89
RS015148	2.3038	-0.113845	0.191744	0.270781	0.219752	0.394225	3.95508	363.453	1.99443e-75	2.04482e-73	FBgn0036997	CG5955
RS007008	-4.79624	-0.266661	0.00931505	-0.341206	-0.369913	-0.118815	2.22536	360.565	8.31824e-75	8.47265e-73	FBgn0027073	CG4302
RS006264	-1.49836	-0.0519704	-0.427077	0.0429644	-0.23747	0.110909	8.6087	355.895	8.3735e-74	8.41932e-72	FBgn0034145	CG5065
RS002081	1.44578	-0.175029	-0.164863	-0.195247	-0.0757342	0.330821	6.41857	355.894	8.37394e-74	8.41932e-72	FBgn0028420	Kr-h1
RS005946	-0.460105	0.061766	0.079987	0.254932	0.226742	-0.018577	9.57381	355.482	1.02678e-73	1.02572e-71	FBgn0030505	NFAT
RS002356	-1.6518	-0.142077	-0.281069	0.374992	-0.0426715	0.032665	5.9046	353.838	2.31493e-73	2.29783e-71	FBgn0034145	CG5065
RS003705	-1.0572	0.0856491	-0.395817	-0.449578	-0.399267	-0.105466	8.41705	353.414	2.85508e-73	2.81605e-71	FBgn0036169	Fuca
RS002051	-1.54611	-0.0500651	0.306665	0.346356	0.317876	0.084795	7.96182	353.347	2.9504e-73	2.89176e-71	FBgn0013348	TpnC41C
RS000610	8.07568	0.0651427	0.338065	-0.29686	-1.03597	-0.16919	5.10521	350.8	1.03905e-72	1.01204e-70	FBgn0036203	Muc68D
RS004576	-1.03456	0.0373339	0.337731	0.303919	0.248672	0.176816	9.24898	347.161	6.27923e-72	6.07799e-70	FBgn0083919	Zasp52
RS004670	-4.29024	0.087494	0.491587	0.481475	0.217083	0.0440743	4.86313	347.096	6.48388e-72	6.23733e-70	FBgn0261269	conv
RS005258	-1.77739	-0.14399	-0.239899	-0.285474	-0.282201	0.139918	9.2579	345.913	1.16356e-71	1.11245e-69	FBgn0039114	Lsd-1
RS013158	-1.01003	-0.447347	-0.12553	-0.199353	-0.402805	0.326672	6.56242	345.535	1.40274e-71	1.33295e-69	FBgn0043792	CG30427
RS009599	-0.656503	-0.0364735	-0.221596	-0.160209	-0.179422	-0.000711681	9.58308	342.873	5.22795e-71	4.93772e-69	FBgn0000064	Ald
RS006673	1.36972	-0.11278	0.674259	0.654032	0.547404	0.102004	6.21668	342.554	6.12131e-71	5.74666e-69	FBgn0051678	CG31678
RS000948	-1.41112	0.0548936	0.513351	0.388497	0.417166	0.146447	6.39318	339.065	3.43181e-70	3.20247e-68	FBgn0010482	l(2)01289
RS002863	-2.16611	0.00847894	0.0391115	0.15388	0.173486	0.201104	5.00938	337.682	6.79759e-70	6.30558e-68	FBgn0010383	Cyp18a1
RS005307	-1.09518	0.0248631	0.051701	0.0955725	0.0317861	0.0243925	7.07086	336.6	1.15998e-69	1.06965e-67	FBgn0032222	CG5037
RS008885	-1.26623	0.137104	0.0822632	0.0291764	-0.0270679	-0.230298	7.92767	335.723	1.78918e-69	1.64015e-67	FBgn0036316	CG10960
RS007340	2.91155	0.139477	0.75669	0.263252	0.440831	0.127453	3.38048	328.647	5.90123e-68	5.37806e-66	FBgn0031865	Nha1
RS003277	-2.34618	0.00164965	0.542731	0.242745	0.195597	0.202263	6.87375	328.552	6.1825e-68	5.60163e-66	FBgn0039312	CG10514
RS015227	-1.81092	-0.195236	0.167268	-1.75817	-0.852522	0.4712	4.86814	327.719	9.33078e-68	8.40525e-66	NA	NA
RS008600	4.94663	-0.685028	-0.730123	-0.153864	0.181526	0.448769	2.7809	327.233	1.18655e-67	1.06272e-65	NA	NA
RS010272	-3.11253	0.161491	-0.073049	-0.303072	-0.945417	0.00751533	8.73993	326.244	1.93325e-67	1.72158e-65	FBgn0030598	CG9503
RS015219	-2.04547	-0.0589096	0.195242	-0.115866	-0.00480242	0.39723	5.83494	323.547	7.32382e-67	6.48491e-65	FBgn0025454	Cyp6g1
RS003157	-2.30352	-0.00838074	-0.462065	-0.435534	-0.422519	-0.262899	8.24226	323.169	8.82949e-67	7.77394e-65	FBgn0033302	Cyp6a14
RS002557	2.13257	0.238549	-0.574701	-0.20523	-0.0145566	-0.288536	7.1612	322.522	1.21493e-66	1.06368e-64	FBgn0043884	mask
RS003713	-1.71276	-0.0366601	0.18681	0.319194	0.285018	0.194168	4.94464	321.747	1.7822e-66	1.55161e-64	FBgn0029881	pigs
RS013974	1.41148	0.137717	-0.190632	-0.244938	-0.00544874	-0.132669	5.96345	320.329	3.58885e-66	3.10715e-64	FBgn0001296	kar
RS001586	-1.62715	-0.044923	-0.424784	0.441426	0.0323379	0.0995771	6.4227	319.996	4.22935e-66	3.64145e-64	FBgn0029821	CG4020
RS014294	-0.850007	0.0272385	0.234521	0.31062	0.320293	0.062211	9.75381	319.681	4.94192e-66	4.23159e-64	FBgn0050069	CG30069
RS003351	1.49091	0.293949	-0.310407	-0.0367542	0.105494	-0.0272638	6.18117	319.321	5.9047e-66	5.02835e-64	FBgn0039668	Trc8
RS014580	-2.11414	-0.151079	0.254631	0.133273	-0.129883	0.454491	5.62837	318.683	8.08946e-66	6.85142e-64	NA	NA
RS002324	-0.237278	0.0247219	0.275311	-1.14978	-0.775342	-0.0496051	6.12938	318.441	9.11527e-66	7.67851e-64	FBgn0013811	Dhc62B
RS001198	-2.92064	-0.203633	0.749197	0.529444	0.232609	0.465152	8.35913	317.776	1.26587e-65	1.06061e-63	NA	NA
RS013407	7.76838	0.0148941	6.11545	5.7204	6.9381	-2.51677	1.0148	317.564	1.40585e-65	1.17159e-63	FBgn0250815	Jon65Aiv
RS013244	-1.37781	-0.135398	0.0192778	0.259371	-0.169213	0.194399	5.35725	317.294	1.60599e-65	1.33126e-63	FBgn0039754	CG9747
RS014595	-2.57963	-0.67479	2.24169	1.42788	0.576479	-0.114737	3.14752	316.328	2.58784e-65	2.1338e-63	FBgn0038819	Cpr92F
RS008200	-0.281637	0.11982	-0.372051	1.71634	1.15924	-0.118316	4.23542	316.283	2.64633e-65	2.17055e-63	FBgn0053533	lectin-37Db
RS015144	-1.90651	-0.286229	0.429342	0.243004	0.220759	0.46031	7.80435	314.545	6.24027e-65	5.09154e-63	NA	NA
RS003155	-2.21211	0.0305659	-0.414223	-0.535016	-0.444616	-0.329376	8.45239	313.916	8.51446e-65	6.9109e-63	FBgn0033980	Cyp6a20
RS000457	-1.18888	-0.0717502	0.47134	0.271177	0.21634	-0.0757614	8.55906	313.256	1.17935e-64	9.52276e-63	FBgn0027348	bgm
RS003160	-2.62751	-0.102308	0.800625	0.205611	0.399426	0.493999	6.47019	311.807	2.41149e-64	1.93715e-62	FBgn0033302	Cyp6a14
RS014339	2.20421	0.0389171	-0.0965779	0.0817357	0.0492383	-0.193509	3.76545	310.911	3.75226e-64	2.99873e-62	NA	NA
RS005131	-0.44196	-0.00380404	-0.84675	-0.8233	-0.898427	0.0991601	7.998	310.18	5.38309e-64	4.28011e-62	NA	NA
RS006136	-2.23595	0.185724	-0.609551	-0.664227	-0.273626	0.304246	6.70401	309.724	6.74129e-64	5.33281e-62	FBgn0000079	Amy-p
RS014537	-1.22953	-0.0673873	0.149011	0.0137975	-0.10897	-0.0858306	6.64895	308.527	1.2169e-63	9.57787e-62	FBgn0039084	CG10175
RS008458	-0.906297	-0.0106995	0.191377	0.132209	0.170283	0.163443	9.17322	307.889	1.66726e-63	1.30566e-61	FBgn0052000	CG32000
RS006664	-2.06737	-0.490529	-0.0258632	-0.0959101	-0.39529	0.518584	4.19534	307.09	2.47376e-63	1.92755e-61	FBgn0263038	CG43333
RS003963	1.66647	0.164188	0.102811	0.229901	0.262116	-0.255664	4.55719	305.718	4.86829e-63	3.7745e-61	FBgn0032741	Side
RS014414	-2.12101	-0.112806	0.238392	0.210716	0.222	0.270461	3.67313	304.793	7.68674e-63	5.93021e-61	FBgn0015032	Cyp4c3
RS008819	-1.0438	0.0496003	0.355568	0.123105	0.167269	-0.0212749	6.77156	303.788	1.26175e-62	9.6863e-61	FBgn0261625	CG42708
RS008155	-1.16258	-0.0993224	-0.0352724	0.340584	0.0879179	0.0602462	7.21331	302.332	2.58885e-62	1.97768e-60	FBgn0040259	Ugt86Da
RS001585	-1.90697	-0.0849612	-0.302927	0.392869	-0.0562158	0.183191	3.91631	302.319	2.60586e-62	1.98097e-60	FBgn0043792	CG30427
RS000947	-1.12461	0.0611309	0.439602	0.386993	0.403353	0.11065	8.41486	302.227	2.7261e-62	2.06231e-60	FBgn0010482	l(2)01289
RS015370	-1.6357	-0.0953969	-0.285395	-0.0792322	-0.259229	0.0995581	7.77404	301.867	3.25582e-62	2.45114e-60	NA	NA
RS007427	-3.80462	0.1636	0.869523	1.48838	1.55837	0.281053	6.10366	301.101	4.75213e-62	3.56044e-60	NA	NA
RS010177	2.14255	-0.260369	0.168441	0.130463	0.186077	0.752114	4.7506	300.695	5.80484e-62	4.32836e-60	FBgn0033724	CG8501
RS004290	-3.03462	-0.205018	0.680243	0.479506	0.918217	0.620739	3.17756	299.743	9.28422e-62	6.88977e-60	FBgn0004577	Pxd
RS002357	-2.54117	-0.148467	-0.355323	0.0341075	-0.628453	0.368831	3.65938	299.22	1.20182e-61	8.87637e-60	FBgn0032055	CG13091
RS006137	-2.22125	0.323253	-0.53149	-0.819581	-0.903052	0.162683	7.80854	299.065	1.2973e-61	9.53637e-60	FBgn0000079	Amy-p
RS006639	1.25034	0.0332421	-0.274763	0.659184	-0.644303	-0.0448718	6.72032	298.303	1.88955e-61	1.38247e-59	FBgn0000422	Ddc
RS000259	-1.21437	-0.0882537	0.217855	0.131261	0.13451	0.208335	7.61868	297.187	3.27735e-61	2.38181e-59	FBgn0041789	Pax
RS000419	1.95963	0.0418116	0.0768663	0.201642	0.157039	0.253158	6.12472	297.181	3.28599e-61	2.38181e-59	FBgn0032775	CG17544
RS013913	5.38736	0.400869	0.700953	0.313347	1.3577	-0.164265	9.16133	295.523	7.44496e-61	5.3714e-59	NA	NA
RS007494	-1.69553	-0.482239	-0.52182	-0.181678	-0.380578	0.578546	5.66429	295.2	8.73479e-61	6.27295e-59	FBgn0035293	CG5687
RS004148	-1.56565	0.0428557	0.129941	0.164252	-0.054164	0.0162978	5.15938	294.797	1.06515e-60	7.61432e-59	FBgn0036659	CG9701
RS006551	-1.39299	0.0659516	-0.141745	0.200049	0.153556	-0.326924	5.7337	294.545	1.20662e-60	8.58625e-59	FBgn0032436	CG5418
RS000615	8.80827	0.09396	0.824844	-0.269953	-0.485853	0.120067	2.57219	294.39	1.30244e-60	9.22603e-59	NA	NA
RS009727	2.98944	-0.546046	0.622785	0.105844	0.0571037	0.792307	5.47799	294.371	1.31463e-60	9.27019e-59	NA	NA
RS002633	-2.0086	-0.13441	-0.431674	-0.9476	-1.09247	0.109568	4.6585	293.358	2.16623e-60	1.52065e-58	NA	NA
RS011508	-0.995431	-0.0214732	0.24223	0.352824	0.342606	0.187627	13.4895	293.271	2.26162e-60	1.5805e-58	FBgn0264695	Mhc
RS003662	-1.96456	0.11703	1.01491	0.727108	0.356242	-0.180061	3.99586	292.16	3.91228e-60	2.72183e-58	FBgn0051086	CG31086
RS000328	1.33333	-0.0943856	0.0175989	0.110896	0.0120477	0.199011	5.46872	291.597	5.16405e-60	3.57674e-58	FBgn0025373	Fpps
RS011687	-2.56024	-0.212271	0.417077	0.172212	0.013958	0.507066	4.38874	291.147	6.44651e-60	4.44524e-58	FBgn0037323	CG2663
RS000128	0.872923	-0.0288615	0.246531	0.131341	0.0765105	-0.0652082	7.65322	291.097	6.60693e-60	4.53579e-58	FBgn0086357	Sec61alpha
RS007636	2.02436	0.404179	-0.212854	-0.0226326	0.262571	-0.476752	7.97411	290.958	7.07555e-60	4.8362e-58	FBgn0030357	Sclp
RS013889	1.3378	-0.0454308	0.314211	0.129549	0.24044	0.123851	5.21073	287.675	3.57193e-59	2.43079e-57	FBgn0038799	CG4288
RS011864	0.597268	0.161847	-0.0360889	0.0692699	0.13108	0.00374999	8.21513	287.653	3.611e-59	2.44668e-57	FBgn0017579	RpL14
RS007214	0.77748	-0.357183	-0.846269	-1.13437	-1.12079	0.291256	7.67314	287.433	4.02389e-59	2.71465e-57	NA	NA
RS011754	-1.4185	0.11162	0.449462	0.467931	0.427168	0.0307274	9.36152	287.174	4.57231e-59	3.07133e-57	FBgn0031692	TpnC25D
RS011716	3.50195	0.23646	-1.51778	-0.6081	-0.892156	-0.503536	2.89652	286.139	7.61914e-59	5.09599e-57	FBgn0030598	CG9503
RS006879	-0.0159276	-0.263974	-2.98002	-3.12658	-3.41618	-0.0781441	2.34689	285.671	9.59586e-59	6.39068e-57	FBgn0036829	Ir75d
RS013681	-3.18164	0.0249763	-0.0107646	0.334482	-0.361822	0.541045	2.85561	282.009	5.83591e-58	3.87008e-56	NA	NA
RS012684	-1.22709	0.0685279	-0.294851	-0.655948	-0.810531	0.10534	11.6813	280.513	1.22013e-57	8.05702e-56	NA	NA
RS001197	-2.62672	-0.332986	0.725557	0.507468	0.398624	0.615627	11.109	279.815	1.72068e-57	1.13144e-55	NA	NA
RS008898	1.04481	-0.00466519	0.16432	0.268967	0.247048	0.215645	5.68566	279.547	1.96432e-57	1.28622e-55	FBgn0037239	CG11739
RS011488	0.813593	-0.0670415	-0.277575	-0.256579	-0.229684	-0.051781	8.0074	279.519	1.99159e-57	1.29861e-55	FBgn0037580	DppIII
RS008883	-1.52873	0.0879625	0.0455796	0.0285922	-0.138477	-0.136488	6.93866	279.371	2.14202e-57	1.39089e-55	FBgn0040259	Ugt86Da
RS000801	-1.11639	-0.0511975	-0.440601	0.226541	2.63199	-0.115409	2.41856	278.992	2.58175e-57	1.66946e-55	FBgn0036831	CG6839
RS006351	0.676316	-0.02574	-0.0752418	-0.0642712	-0.0197593	-0.00248904	7.74782	277.556	5.23897e-57	3.37372e-55	FBgn0032444	CG5525
RS000748	1.17673	0.0681728	0.0487103	0.0596487	0.171809	-0.0765902	7.47321	277.118	6.50421e-57	4.17126e-55	FBgn0033912	RpS23
RS005515	-1.25264	-0.00634452	0.155024	0.209654	0.243059	0.120198	6.16628	276.107	1.07011e-56	6.83467e-55	FBgn0029791	CG4096
RS008454	-1.64984	-0.277834	0.253435	-0.344481	-0.445611	0.692785	4.68112	274.235	2.69203e-56	1.71235e-54	NA	NA
RS009271	-1.83326	0.0179713	0.672672	-0.521803	0.178503	0.335388	6.07276	273.494	3.87935e-56	2.45755e-54	FBgn0043884	mask
RS014376	1.51943	0.159073	-0.553155	-0.365401	-0.1222	-0.0712624	4.9412	273.294	4.28148e-56	2.70132e-54	NA	NA
RS015224	-1.88167	0.218714	-0.314062	0.604691	-0.438631	-0.237005	3.30614	272.761	5.56727e-56	3.4984e-54	NA	NA
RS011854	-0.928523	-0.107387	-0.0994333	-0.13144	-0.206676	0.0735105	7.72269	271.847	8.73281e-56	5.46554e-54	FBgn0010548	Aldh-III
RS011130	0.680059	0.00309181	0.0121236	-0.0183069	0.00872048	-0.00166955	9.21729	271.702	9.3782e-56	5.84599e-54	FBgn0015245	Hsp60
RS009134	-1.5429	0.11519	0.482263	0.534088	0.638149	0.222003	4.40881	271.604	9.84505e-56	6.11256e-54	FBgn0259680	Pkcdelta
RS003197	-1.50511	0.0222568	0.0910361	0.233877	0.250019	0.208938	5.97043	271.149	1.23182e-55	7.61776e-54	FBgn0033679	CG8888
RS012877	1.73112	-0.320087	0.0740531	0.191007	-0.0950283	0.746584	5.46702	271.054	1.29045e-55	7.94876e-54	FBgn0033391	CG8026
RS010080	-0.869267	-0.032257	0.130794	0.129795	0.085824	0.113012	9.93613	270.74	1.50656e-55	9.24342e-54	FBgn0010352	Nc73EF
RS011519	-1.27673	-0.110933	0.581831	0.360031	0.319438	0.262861	5.39771	269.19	3.23319e-55	1.97593e-53	FBgn0052627	NnaD
RS000617	8.38637	-0.0665092	0.980224	-0.108034	-0.307973	-0.300845	5.17085	268.155	5.38327e-55	3.27706e-53	FBgn0031420	CG9866
RS004133	-0.767293	-0.300115	-0.501058	-0.598282	-0.614447	0.42737	7.6853	267.246	8.42494e-55	5.10873e-53	FBgn0003462	Sod
RS011246	-0.936533	0.0353445	0.106732	0.17374	-0.1502	-0.0637374	5.59695	266.606	1.15466e-54	6.97451e-53	FBgn0003495	spz
RS000616	9.40557	-1.71412	1.06744	0.303049	-0.392177	1.19188	4.52229	266.28	1.35562e-54	8.15673e-53	FBgn0029167	Hml
RS007071	1.50214	-0.0607018	0.425625	0.571325	0.339688	0.325982	7.58181	265.603	1.89258e-54	1.13438e-52	FBgn0086450	su(r)
RS000049	1.44269	-0.0350932	-0.153976	-0.386076	-0.298392	0.376843	5.06794	265.489	2.00189e-54	1.1953e-52	FBgn0036816	Indy
RS005263	-3.30564	-0.0580154	-0.0710759	0.209688	0.152464	0.766003	4.32928	265.465	2.02494e-54	1.20445e-52	NA	NA
RS015186	-0.931617	-0.16214	0.195997	0.230451	0.0885643	0.212766	8.60413	265.179	2.33164e-54	1.38161e-52	FBgn0261341	verm
RS011737	-1.1724	0.0257523	0.035184	-0.0131127	-0.456193	-0.0488126	8.76691	264.443	3.34984e-54	1.97742e-52	NA	NA
RS006538	-2.15373	0.219397	-0.387545	-0.424192	-0.874504	-0.00871304	5.22714	264.396	3.42825e-54	2.01607e-52	NA	NA
RS004781	0.681898	0.0130138	-0.100041	-0.118689	-0.1619	-0.029766	12.0558	264.103	3.96115e-54	2.3207e-52	FBgn0261619	pAbp
RS009172	-0.84408	-9.78351e-05	0.15178	0.255199	0.0647072	0.214524	6.9591	262.124	1.04961e-53	6.12626e-52	FBgn0015600	toc
RS010378	0.907165	-0.0176219	-0.0410328	0.0445283	0.036642	-0.0207682	10.3301	260.298	2.57975e-53	1.5001e-51	FBgn0000370	crc
RS012649	1.71094	0.209489	-0.524107	-0.184864	-0.120131	-0.195785	8.19299	259.889	3.15453e-53	1.82752e-51	FBgn0010423	TpnC47D
RS002446	0.934956	0.0892011	-0.0849553	0.0275497	-0.0284258	-0.125331	7.39508	259.439	3.93785e-53	2.27287e-51	FBgn0034968	RpL12
RS013378	2.81837	0.140772	-0.0690084	-0.172533	0.28645	-0.020141	5.37408	259.297	4.22272e-53	2.4283e-51	NA	NA
RS015111	-1.80762	-0.178252	-0.00947736	-0.861312	-0.453747	-0.156168	4.7194	258.79	5.42055e-53	3.10566e-51	NA	NA
RS012509	-1.05305	0.102851	0.134101	-0.0991344	-0.174099	-0.125537	5.82738	257.233	1.16637e-52	6.65816e-51	FBgn0052758	CG32758
RS014674	1.25904	0.0704137	-0.129899	0.0913057	0.139734	-0.0930776	7.05931	256.685	1.52778e-52	8.6894e-51	FBgn0001217	Hsc70-2
RS013836	-1.08819	0.12242	-0.272373	-0.283819	-0.55898	-0.102517	7.96171	256.561	1.62391e-52	9.20255e-51	FBgn0027594	drpr
RS001673	1.85503	-0.0581269	-2.25484	-0.116455	0.103869	0.454574	4.7813	255.094	3.34316e-52	1.88768e-50	FBgn0025390	Mur2B
RS000547	1.06769	0.0134275	-0.0482265	0.0105851	0.0549872	-0.0495043	7.92584	254.046	5.60018e-52	3.15066e-50	FBgn0032987	RpL21
RS001614	-1.19196	-0.10768	0.546299	0.298858	0.258226	0.138112	6.01861	253.883	6.06688e-52	3.40094e-50	FBgn0000163	baz
RS002535	-1.06151	-0.00335676	0.241492	0.142746	0.192299	0.016331	9.28296	253.407	7.67103e-52	4.28478e-50	FBgn0033246	ACC
RS000474	0.591516	0.0263392	-0.104758	0.0187662	-0.039562	-0.0679685	9.70986	252.873	9.97266e-52	5.5505e-50	FBgn0000100	RpLP0
RS003811	-0.74092	-0.136643	-0.241716	-0.208342	-0.212698	0.0823762	7.91087	252.745	1.06252e-51	5.89261e-50	FBgn0025814	Mgstl
RS000275	-1.32245	-0.0685088	0.0759299	0.0347515	0.0519033	0.266621	8.31069	252.259	1.34934e-51	7.45676e-50	FBgn0033446	CG1648
RS000365	-1.42814	-0.092814	0.395758	0.281034	0.261126	0.231378	11.7516	252.147	1.42588e-51	7.8519e-50	FBgn0263006	Ca-P60A
RS003695	-0.75317	0.0253506	0.178444	0.12427	0.176011	0.0711311	11.9583	251.394	2.06553e-51	1.13342e-49	FBgn0003149	Prm
RS014495	-0.118321	-0.466843	-5.21221	-1.41528	-1.74181	0.191377	3.78655	250.866	2.67888e-51	1.46483e-49	FBgn0069973	CG40485
RS010853	0.673332	0.042065	-0.127386	-0.0967715	-0.127888	-0.0662637	7.92188	249.849	4.41736e-51	2.407e-49	FBgn0037632	Tcp-1eta
RS008068	-1.618	-0.0550085	0.697461	0.425677	0.384228	0.154318	5.33841	249.698	4.75818e-51	2.58368e-49	FBgn0261269	conv
RS002148	7.53255	0.159601	7.13857	5.4617	5.40402	-1.66046	0.859225	246.902	1.88314e-50	1.01899e-48	FBgn0261714	Cpn
RS000720	-1.30837	0.0516412	-0.000491903	0.0579696	0.0545714	0.196967	5.22488	246.834	1.94743e-50	1.05013e-48	FBgn0015872	Drip
RS001316	1.02553	0.0540825	-0.185447	-0.01528	0.025281	-0.106742	8.5841	246.486	2.31059e-50	1.24166e-48	FBgn0037351	RpL13A
RS007082	-1.25952	-0.315292	-0.0131226	-0.102882	-0.13358	0.246645	6.38607	246.398	2.41311e-50	1.2923e-48	FBgn0003450	snk
RS011326	-2.50857	0.0479331	-0.769498	-0.137585	-0.008186	0.0960061	3.00394	245.983	2.95935e-50	1.5794e-48	FBgn0033464	CG1441
RS001584	-0.926202	-0.308512	-0.102845	-0.292903	-0.25486	0.260025	6.62438	244.8	5.29567e-50	2.81665e-48	FBgn0033631	Sod3
RS006104	0.758879	-0.162125	0.0949314	0.13055	0.0644087	0.212997	9.48897	244.783	5.34021e-50	2.83067e-48	FBgn0001145	Gs2
RS010932	-1.70416	-0.0953148	-0.105325	-0.428194	-0.201407	0.193303	7.36288	244.551	5.9858e-50	3.16213e-48	FBgn0085378	CG34349
RS007228	-1.63954	-0.217875	-0.175285	-0.0971485	-0.228962	0.514254	5.59754	244.335	6.65718e-50	3.50491e-48	FBgn0038610	CG7675
RS011410	-1.37507	0.0662913	0.17914	0.04034	-0.20206	-0.0503445	4.61668	243.204	1.16133e-49	6.09364e-48	FBgn0262599	CG43129
RS011713	-2.64772	-0.49975	-0.125325	0.513788	0.695959	0.800838	3.37975	242.997	1.28544e-49	6.72222e-48	FBgn0030598	CG9503
RS015301	7.71888	1.64673	6.80298	6.07637	6.39478	-3.39458	1.03998	242.655	1.5214e-49	7.92961e-48	FBgn0261269	conv
RS007472	0.571591	0.0251991	-0.144734	0.123243	0.110432	0.0230508	8.18607	241.843	2.26753e-49	1.1779e-47	FBgn0032518	RpL24
RS008697	1.43027	-0.301982	-1.13275	-0.896299	-1.08086	0.133367	4.28976	240.725	3.93042e-49	2.03494e-47	NA	NA
RS004608	-1.31783	-0.0106712	0.423308	0.366165	0.351509	0.176952	9.07219	239.291	7.95648e-49	4.10575e-47	FBgn0261565	Lmpt
RS004376	-3.07849	0.0166756	0.639864	0.480595	0.585788	0.231355	9.92984	238.897	9.65706e-49	4.96685e-47	NA	NA
RS010164	-2.00817	-0.130679	0.154332	0.113477	0.0219988	0.394284	9.1323	238.65	1.09025e-48	5.58897e-47	FBgn0033302	Cyp6a14
RS013524	-1.00322	-0.076391	0.103029	0.121955	0.135534	0.113938	6.7935	238.535	1.15347e-48	5.89366e-47	FBgn0034420	CG10737
RS001672	-1.78189	-0.224903	-0.36279	-0.274727	-0.525967	0.17566	5.0134	238.251	1.3263e-48	6.75459e-47	FBgn0000261	Cat
RS001442	-0.509319	-0.256932	-1.84045	-0.501321	-0.393904	0.276167	5.91986	237.273	2.14516e-48	1.08893e-46	FBgn0034145	CG5065
RS006009	3.98699	0.680361	1.18185	0.962744	0.852973	-0.491642	2.20373	237.006	2.44691e-48	1.23807e-46	FBgn0029690	CG6414
RS005487	-1.69727	-0.109967	0.455088	0.165567	-0.111271	0.0322624	5.10492	236.716	2.82151e-48	1.42299e-46	NA	NA
RS003528	-0.921823	0.193016	-1.12414	-1.18146	-1.24725	-0.0959588	8.49084	236.556	3.05201e-48	1.53427e-46	FBgn0026061	Mipp1
RS000614	9.74579	0.0907199	1.16512	0.187486	-0.47914	-0.0737383	3.34547	236.191	3.65187e-48	1.82993e-46	NA	NA
RS006022	-1.25688	-0.0855661	2.14982	1.7	2.23713	-0.460227	3.24125	235.95	4.11112e-48	2.05345e-46	FBgn0037513	pyd3
RS001256	0.883768	-0.0480264	0.127944	0.093333	0.0793829	-0.013367	7.22295	235.727	4.58883e-48	2.28474e-46	FBgn0025678	CaBP1
RS013687	-1.09753	-0.162763	-0.273889	0.318343	0.100063	0.139906	7.78868	235.522	5.07405e-48	2.51828e-46	FBgn0043043	desat2
RS008882	-1.61335	-0.338304	0.212758	-0.0696912	-0.209542	0.611839	8.12047	235.085	6.28941e-48	3.11156e-46	NA	NA
RS003246	1.36523	0.00395008	-0.0462247	0.365268	0.179987	-0.0916751	4.73013	233.978	1.08384e-47	5.34509e-46	FBgn0086447	l(2)37Cg
RS001208	1.27056	0.132452	-0.209127	-0.175918	-0.114459	-0.235214	5.31315	233.701	1.24232e-47	6.10738e-46	NA	NA
RS001217	-1.60745	-0.0945583	0.169479	-0.426928	-0.275017	0.0805646	8.77551	233.577	1.3198e-47	6.46783e-46	FBgn0027508	tankyrase
RS011602	-1.28253	-0.0727847	0.108566	0.0441037	-0.047161	-0.172657	8.92183	233.55	1.33747e-47	6.53392e-46	FBgn0012034	AcCoAS
RS003905	-1.5248	0.0478405	0.1213	0.497415	0.562035	0.180872	4.67677	233.101	1.66843e-47	8.12525e-46	FBgn0051100	CG31100
RS008041	0.737471	-0.0167006	-0.090181	-0.119921	-0.136771	0.0388994	7.55668	231.877	3.04469e-47	1.47814e-45	FBgn0034753	CG2852
RS007124	1.89981	0.00553419	-0.0156446	0.0351227	-0.131881	-0.0817521	5.17592	231.806	3.15263e-47	1.52579e-45	FBgn0005659	Ets98B
RS015368	-1.17954	-0.0210017	-0.659742	-0.876188	-0.923004	0.25035	10.6517	231.622	3.45095e-47	1.665e-45	NA	NA
RS008597	5.67122	0.332564	-1.65336	-2.12783	-1.70854	-1.02281	1.85078	231.301	4.03937e-47	1.94289e-45	FBgn0044048	Ilp5
RS013178	-0.700105	-0.00632418	0.117064	0.199441	0.194063	0.123333	8.3569	230.718	5.38012e-47	2.57981e-45	FBgn0036365	CG10732
RS007983	-1.4792	0.0707611	-0.383611	-1.17681	-0.589156	0.0130543	4.45245	230.589	5.73148e-47	2.73986e-45	NA	NA
RS005754	5.81618	-1.58684	5.06544	2.83971	4.40086	-0.646951	0.793281	229.971	7.76842e-47	3.70223e-45	NA	NA
RS011857	1.34704	-0.397202	0.0153413	0.0895149	0.0242184	0.588671	6.3782	228.899	1.31502e-46	6.24795e-45	FBgn0036208	CG10361
RS006256	-1.7225	-0.335463	-0.0260462	-0.358737	-0.216655	0.646945	4.23179	228.226	1.83078e-46	8.672e-45	FBgn0036481	CG16959
RS014413	-2.26114	-0.067758	0.466106	0.36829	0.365319	0.265319	3.01758	224.965	9.08637e-46	4.29097e-44	FBgn0015032	Cyp4c3
RS006021	-0.996931	-0.0934001	0.124077	0.111418	0.0683816	0.134369	5.93826	224.174	1.33957e-45	6.30689e-44	FBgn0037203	slif
RS002013	9.14198	2.48366	3.42063	2.94145	2.5011	-3.64984	2.45571	222.225	3.48957e-45	1.63799e-43	FBgn0085397	Fili
RS009726	1.40166	-0.348968	0.291582	-0.237924	-0.44605	0.491244	5.24865	222.005	3.88709e-45	1.81911e-43	NA	NA
RS010162	-1.46783	-0.241377	0.26567	-0.0226036	-0.13641	0.253481	6.62778	221.788	4.32459e-45	2.0178e-43	FBgn0025454	Cyp6g1
RS014275	-1.99367	-0.442142	0.146663	0.220741	-0.0873699	0.551812	3.82438	220.993	6.39155e-45	2.97331e-43	FBgn0039480	Cpr97Ea
RS004232	-1.03936	0.0324544	0.280866	0.567399	0.204056	0.135941	6.88394	220.839	6.89221e-45	3.19667e-43	FBgn0020439	fau
RS005851	0.975132	-0.0755783	-0.0934547	0.0251766	-0.172489	0.121026	7.53789	219.96	1.06114e-44	4.90708e-43	FBgn0036007	path
RS003593	-1.65098	-0.163242	0.313393	0.0116373	-0.0882268	0.41917	7.28599	219.848	1.1213e-44	5.16992e-43	FBgn0034468	Obp56a
RS009746	-1.52201	-0.365756	0.659516	0.57823	0.208238	0.656245	6.98633	219.768	1.16588e-44	5.35963e-43	FBgn0039768	CG15533
RS004935	-2.60319	-0.129522	0.704382	1.12988	1.13095	0.465638	2.45004	219.539	1.30504e-44	5.98167e-43	NA	NA
RS010601	-2.12392	-0.0467789	0.320383	0.362127	0.196896	0.420888	6.68572	218.779	1.89467e-44	8.65881e-43	FBgn0038037	Cyp9f2
RS015576	-0.842003	0.0344605	0.145947	0.0143929	-0.0242965	-0.0868414	7.0252	218.148	2.58251e-44	1.17678e-42	FBgn0032402	CG14945
RS011367	0.526629	-0.0794372	-0.0157327	-0.209208	-0.255483	0.395625	8.06213	217.871	2.95919e-44	1.34449e-42	FBgn0000053	ade3
RS011646	-1.90139	-0.122554	0.0203342	-0.0551621	-0.00919607	0.414823	3.91558	217.124	4.26928e-44	1.93408e-42	FBgn0004103	Pp1-87B
RS004403	-0.612998	-0.021031	-0.0675849	-0.142198	-0.277726	0.110932	9.31721	215.826	8.07375e-44	3.647e-42	FBgn0001297	kay
RS011521	-1.43	-0.0929089	-0.418126	0.104251	-0.157361	0.16709	8.21646	215.732	8.45564e-44	3.80846e-42	FBgn0038610	CG7675
RS007059	-1.15466	0.118071	-0.329076	-0.992964	-1.04829	0.0383794	6.78288	215.597	9.03679e-44	4.05848e-42	FBgn0032402	CG14945
RS003816	5.6325	-1.62159	6.27901	4.7372	5.87193	-1.40038	0.603487	215.055	1.17896e-43	5.27957e-42	FBgn0250815	Jon65Aiv
RS001819	-1.86334	0.0914053	0.0512185	0.249294	-0.159408	-0.329229	3.05026	214.654	1.43523e-43	6.40875e-42	FBgn0261680	CG42727
RS005231	0.984835	-0.0923005	0.278835	0.222106	0.162267	0.103008	5.41622	214.583	1.48638e-43	6.6182e-42	FBgn0019952	Orct
RS001294	-1.75718	-0.0496193	-0.252154	-0.143158	0.0160304	-0.0301653	7.40907	214.088	1.89447e-43	8.41125e-42	FBgn0259230	lectin-22C
RS005461	-0.788565	0.0553225	0.0273297	-0.0177661	0.138213	0.0846301	7.16077	213.993	1.98546e-43	8.79018e-42	FBgn0037144	CG7458
RS002734	0.694377	-0.0455978	-0.0169391	-0.154438	-0.0826779	-0.00066137	7.90347	212.644	3.8483e-43	1.69892e-41	FBgn0053303	CG33303
RS000134	-1.9979	-0.110969	-0.253237	-0.142957	0.173095	0.149993	3.13849	212.121	4.97412e-43	2.18973e-41	FBgn0038309	CG6499
RS015192	1.4097	0.154739	0.0590835	0.0364013	0.197751	0.0469075	5.48865	211.217	7.75228e-43	3.40314e-41	FBgn0032783	CG10237
RS010964	-0.749856	-0.0820556	0.376358	0.17036	0.238599	0.215957	9.24394	211.132	8.08308e-43	3.53839e-41	FBgn0261260	mgl
RS012361	-1.08006	-0.0999844	0.225804	0.314518	0.359686	0.316014	5.52628	210.559	1.07073e-42	4.67403e-41	FBgn0052751	CG32751
RS006506	2.64805	0.863389	0.0656619	0.208004	0.405085	-0.934546	3.14069	210.209	1.27139e-42	5.53445e-41	FBgn0050377	CG30377
RS000219	0.719258	-0.0145516	-0.265951	-0.219763	-0.178703	-0.062183	7.16838	210.108	1.3359e-42	5.79909e-41	FBgn0027108	inx2
RS006215	0.718822	-0.054009	-0.0257321	-0.131284	-0.0361275	0.107211	9.54887	210.024	1.3917e-42	6.0245e-41	FBgn0014002	Pdi
RS003028	8.68798	0.0445991	8.25256	7.84847	6.53501	-1.02006	1.94578	209.401	1.8892e-42	8.15549e-41	NA	NA
RS004014	-1.11475	-0.00538761	0.162542	0.175862	0.168946	0.178333	5.6258	208.662	2.71464e-42	1.16865e-40	FBgn0034931	CG2812
RS002049	-0.94125	0.193033	-0.305702	-0.987052	-0.856872	-0.0936527	8.05896	207.524	4.7438e-42	2.03657e-40	FBgn0259247	laccase2
RS007612	-0.84919	-0.0215119	0.292326	0.175374	-0.000670039	0.0144437	7.15131	206.872	6.53144e-42	2.79632e-40	FBgn0038818	Nep4
RS005559	-1.58108	0.0508633	-0.0518081	0.0759595	0.090902	0.285909	4.85513	206.838	6.63996e-42	2.83499e-40	NA	NA
RS012866	-2.11537	-0.0118073	0.734655	0.95186	1.08023	0.494022	2.85209	206.753	6.92372e-42	2.94807e-40	FBgn0262534	CG43088
RS003550	-1.38518	-0.256215	1.59545	1.58312	1.29893	0.348168	6.08982	206.357	8.40928e-42	3.57085e-40	NA	NA
RS002139	5.02463	-0.817516	6.68512	5.40343	6.13875	-1.21974	0.8588	206.162	9.2541e-42	3.91891e-40	FBgn0085265	CG34236
RS002050	-2.02672	-0.150432	0.598159	0.654847	0.256245	0.616094	8.11076	206.112	9.48276e-42	4.00486e-40	FBgn0259247	laccase2
RS012908	-1.14809	0.079564	-0.732449	-0.719395	-0.471613	0.0516779	6.34831	205.64	1.19502e-41	5.0333e-40	FBgn0026061	Mipp1
RS000493	4.8392	-1.35042	4.3116	3.06376	4.03173	-1.0067	1.18071	204.974	1.65655e-41	6.95839e-40	NA	NA
RS006295	1.10147	-0.315954	-0.00511334	-0.115087	-0.0961257	0.488806	5.13747	204.967	1.66262e-41	6.96514e-40	FBgn0001168	h
RS006212	-1.03698	-0.361723	0.0357184	-0.303431	-0.264272	0.40765	8.22101	204.668	1.92458e-41	8.04091e-40	FBgn0030251	CG2145
RS012479	-1.05545	-0.176495	0.319825	0.450684	0.121873	0.32059	6.94209	204.257	2.35498e-41	9.81285e-40	FBgn0035575	CG7509
RS003554	-0.995964	-0.186132	0.0993907	-0.044084	-0.276375	0.268021	6.02327	203.78	2.97482e-41	1.23626e-39	FBgn0033159	Dscam
RS013664	-1.61501	-0.0823353	0.22292	-0.0744357	-0.0468751	0.140862	8.50431	203.505	3.40445e-41	1.41104e-39	FBgn0033302	Cyp6a14
RS007239	1.00512	-0.415863	-0.0397155	-0.214624	-0.40237	0.784397	9.38799	203.436	3.52217e-41	1.45596e-39	FBgn0032350	CG6287
RS013542	-0.624234	0.162417	0.636929	0.534746	0.52166	-0.0937639	6.99648	203.399	3.58566e-41	1.47828e-39	NA	NA
RS006263	-1.0575	-0.0638972	-0.145175	0.160603	-0.136727	-0.13028	5.91545	202.845	4.70557e-41	1.93487e-39	FBgn0039131	CG12268
RS000210	2.39698	0.24977	-0.361382	-0.331533	-0.738227	-0.377696	4.38292	202.624	5.24368e-41	2.15046e-39	FBgn0033302	Cyp6a14
RS007016	-1.27658	-0.128484	0.0313658	-0.102735	-0.178578	0.408878	5.09054	202.511	5.54299e-41	2.26724e-39	FBgn0261446	CG13377
RS011457	-1.84867	-0.283378	0.264639	0.149482	0.224963	0.600665	7.47926	202.496	5.58394e-41	2.27801e-39	FBgn0051676	CG31676
RS013544	-0.902107	-0.0578468	0.221418	0.158091	0.195668	0.151052	6.13961	202.078	6.85306e-41	2.78846e-39	FBgn0262509	nrm
RS000569	0.831568	0.106195	-0.119214	-0.334674	-0.432194	-0.0749356	7.03565	201.832	7.73152e-41	3.13771e-39	FBgn0039681	CG7582
RS003863	-1.33682	-0.509941	0.445953	-0.0208992	0.246223	0.38412	6.36537	201.596	8.67843e-41	3.51285e-39	FBgn0031975	Tg
RS002528	1.87571	0.203889	0.166052	-0.0834994	0.322504	-0.378595	4.69126	200.89	1.22707e-40	4.95404e-39	FBgn0036978	Toll-9
RS014481	-1.79388	0.104223	-0.307046	-0.153898	-0.43782	0.115782	7.50225	200.782	1.29348e-40	5.20867e-39	FBgn0038126	CG8483
RS013959	-1.22821	0.041089	-0.360756	-0.497857	-1.07173	-0.165585	7.23435	200.485	1.49609e-40	6.00904e-39	FBgn0022359	Sodh-2
RS013773	-0.74005	-0.22104	0.0802488	0.00690519	-0.170165	0.256173	8.13974	200.212	1.71008e-40	6.85089e-39	FBgn0020389	Papss
RS014437	1.49693	-0.147642	0.275014	0.294705	0.179477	0.350503	7.83482	199.908	1.98471e-40	7.93069e-39	FBgn0036381	CG8745
RS012552	0.895989	0.0085051	0.374081	0.410705	0.204081	0.0119522	5.49445	199.562	2.35254e-40	9.37645e-39	FBgn0039009	CG13842
RS009381	2.47075	0.0267212	0.422862	0.0357813	0.482136	0.393702	2.4485	199.184	2.83044e-40	1.12525e-38	NA	NA
RS003589	-1.2531	-0.0195054	0.426187	0.0312119	0.0245764	0.148113	5.6265	199.173	2.84527e-40	1.12826e-38	FBgn0034468	Obp56a
RS010356	-2.05446	0.147133	-0.630573	0.253815	-0.643055	0.00991536	2.93362	198.451	4.05421e-40	1.60358e-38	FBgn0030884	CG6847
RS006934	1.03508	0.0585467	0.348863	0.411186	0.601185	0.0149295	5.99106	198.184	4.62048e-40	1.82292e-38	FBgn0038341	CG14869
RS011542	-0.687982	-0.0469141	-0.0492155	-0.143845	-0.242946	0.0869389	9.97841	197.969	5.13361e-40	2.02026e-38	FBgn0034405	Jheh2
RS010002	-1.71514	0.00158212	-0.177626	-0.294601	-0.531148	0.571844	4.24248	197.816	5.53297e-40	2.17193e-38	NA	NA
RS001546	-1.57401	-0.311149	0.157091	0.0619585	0.00670539	0.499917	5.60862	197.702	5.85032e-40	2.29074e-38	FBgn0034021	CG8180
RS000584	0.512621	-0.436984	0.213966	-0.337331	-0.262429	0.568972	7.85795	197.048	8.06003e-40	3.14806e-38	FBgn0011695	PebIII
RS000957	-1.25958	0.252593	-0.990062	-1.41204	-1.38217	0.143962	8.57111	196.86	8.84144e-40	3.44462e-38	FBgn0032264	Lip4
RS001007	10.1017	0.016826	7.22917	7.02509	6.452	-2.6249	2.95561	196.523	1.04254e-39	4.05161e-38	FBgn0029762	NAAT1
RS000613	8.39973	0.112069	0.738238	-0.603461	-0.807247	-0.0167391	2.155	196.183	1.23155e-39	4.77424e-38	NA	NA
RS012767	-1.67986	0.178096	0.100488	0.0472145	0.104075	0.181637	4.78905	195.634	1.61184e-39	6.23296e-38	FBgn0033679	CG8888
RS006313	-0.681311	-0.202437	0.429642	0.254383	0.242346	0.441676	7.82655	195.536	1.69084e-39	6.52228e-38	FBgn0259227	CG42327
RS000567	0.821558	0.090581	-0.0517174	0.00899313	0.0570467	-0.0709212	7.45223	195.206	1.98753e-39	7.64783e-38	FBgn0025286	RpL31
RS012148	-1.15363	-0.127606	0.0327132	-0.0600699	-0.154754	0.301258	6.07099	195.14	2.05339e-39	7.88176e-38	FBgn0033987	ckn
RS004624	-1.8609	-0.251174	0.213066	0.260324	-0.15626	0.176724	3.18188	194.386	2.97067e-39	1.13747e-37	FBgn0036659	CG9701
RS011382	-0.517602	-0.0505672	-0.0802123	-0.0930629	-0.208945	0.0647233	8.11554	194.222	3.21818e-39	1.22922e-37	NA	NA
RS005999	-1.0857	-0.0154715	0.381317	0.00532	-0.0931729	0.146856	5.78904	194.177	3.28999e-39	1.25358e-37	FBgn0017590	klg
RS001544	-1.6078	0.118597	-0.778013	-0.887447	-0.750671	-0.328336	7.38631	193.571	4.4283e-39	1.68319e-37	FBgn0016123	Aph-4
RS012827	0.503656	-0.130373	0.0898902	0.0541642	0.00999845	0.102765	7.53251	192.952	5.99519e-39	2.27321e-37	FBgn0015622	Cnx99A
RS010279	0.54624	0.0378707	0.0481689	0.0504718	-0.0526271	0.0268355	8.39476	192.538	7.3426e-39	2.77736e-37	FBgn0032447	PICK1
RS007743	-1.20689	-0.0597392	0.412405	0.404326	0.277426	0.231909	6.31919	192.531	7.36736e-39	2.77997e-37	FBgn0030746	CG9981
RS006629	-1.01935	0.114516	-0.573543	-0.436819	-0.239324	-0.154618	5.29462	192.51	7.44321e-39	2.80181e-37	FBgn0030510	CG12177
RS005136	-0.795991	0.0017502	-0.0230644	0.00869776	-0.0811525	0.146263	6.72108	192.392	7.88672e-39	2.96161e-37	FBgn0023531	CG32809
RS013228	-0.828	0.0756993	-0.181032	-0.329804	-0.38013	0.0968623	8.52353	191.393	1.28613e-38	4.81804e-37	FBgn0261015	Pif1A
RS000959	-1.29275	0.211393	-1.08058	-1.56596	-1.54096	0.14442	6.96406	191.339	1.32083e-38	4.93617e-37	FBgn0023495	Lip3
RS006939	0.754296	0.0833572	-0.295358	0.0271024	-0.119637	-0.134345	8.87259	191.2	1.41358e-38	5.27015e-37	FBgn0261602	RpL8
RS009661	0.585842	-0.0567319	0.0909149	-0.00222198	0.0613732	0.00242477	8.11686	191.049	1.52252e-38	5.66275e-37	FBgn0034277	CG6370
RS014494	-1.86891	-0.112635	0.115214	-0.217175	-0.377921	-0.0340996	3.19724	190.031	2.50601e-38	9.2985e-37	FBgn0030332	CG9360
RS009070	1.18042	-0.242171	0.221329	0.264062	0.0926852	0.0101343	6.41468	189.988	2.55884e-38	9.47196e-37	FBgn0032536	Ance-3
RS004852	13.4164	1.07672	10.7476	9.97413	9.4335	-2.60362	7.99559	189.968	2.58467e-38	9.5449e-37	NA	NA
RS013136	-1.19801	0.202589	-0.131784	0.178798	0.177088	0.0182901	6.79369	189.934	2.62767e-38	9.68074e-37	FBgn0031645	CG3036
RS000488	0.702472	0.0290065	0.126468	0.0613326	0.282497	-0.051184	8.21015	189.631	3.04787e-38	1.12023e-36	FBgn0036213	RpL10Ab
RS007436	-0.731927	-0.0618695	0.17873	0.177887	0.202621	0.182927	7.57315	189.503	3.24594e-38	1.19023e-36	FBgn0033504	CAP
RS005093	-1.11539	-0.177675	0.621055	0.510387	0.265976	0.0200318	6.15093	189.041	4.06853e-38	1.48836e-36	FBgn0003748	Treh
RS002848	-1.85277	-0.0139237	-0.190306	-0.2997	-0.760991	-0.0254975	4.0014	188.726	4.74794e-38	1.73283e-36	FBgn0040323	GNBP1
RS006271	-1.94445	0.103314	0.833063	0.368146	0.364912	-0.00417714	2.95083	187.683	7.91086e-38	2.88044e-36	FBgn0038938	CG7084
RS011385	-0.774553	-0.233273	0.157427	0.0827772	0.0852962	0.341049	8.24937	187.436	8.92812e-38	3.24326e-36	FBgn0036454	CG17839
RS000738	0.760139	0.0360797	-0.0657436	0.067744	0.0648343	-0.0912603	8.92605	187.031	1.08832e-37	3.94428e-36	FBgn0014026	RpL7A
RS015485	-3.0742	0.211361	0.656853	0.570908	0.799298	0.196988	1.8408	186.84	1.19515e-37	4.3214e-36	FBgn0262534	CG43088
RS004001	-2.03776	-0.217453	-0.109047	-0.397437	-0.325344	0.449588	3.34803	186.294	1.5607e-37	5.63008e-36	FBgn0037665	St2
RS012437	-1.29096	-0.0644537	0.574925	0.652985	0.7317	0.184905	4.67711	185.967	1.83163e-37	6.59219e-36	FBgn0036659	CG9701
RS005998	-0.936507	-0.0714736	0.340723	0.449284	0.168009	0.106324	5.59147	185.629	2.16188e-37	7.76282e-36	FBgn0025878	wrapper
RS003552	-1.143	-0.077781	0.109623	0.189683	0.242127	0.264907	6.31372	184.409	3.92614e-37	1.40655e-35	FBgn0038350	CG18516
RS011411	-1.61534	-0.213974	0.329264	0.282157	0.293393	0.260221	4.84611	184.304	4.13397e-37	1.47761e-35	FBgn0030257	CG11160
RS000327	0.774513	-0.415084	0.0632296	-0.0759617	-0.31111	0.770378	6.80106	183.68	5.60984e-37	2.00054e-35	FBgn0025373	Fpps
RS014436	2.30412	-0.417393	0.195117	0.223817	0.00638442	0.411175	2.48592	183.535	6.02281e-37	2.14291e-35	NA	NA
RS001882	1.00505	0.0428105	0.128308	0.983605	0.61542	0.0683766	5.66668	183.438	6.31313e-37	2.24109e-35	NA	NA
RS011284	-0.889725	0.0428663	0.415933	0.486435	0.398342	0.107575	8.04124	183.223	7.01306e-37	2.4839e-35	FBgn0264489	CG43897
RS001857	-1.40128	0.0268248	0.0664987	0.062856	-0.22836	-0.0446229	5.02624	183.115	7.39447e-37	2.61305e-35	FBgn0034887	St1
RS015193	-1.44035	-0.101251	0.195614	-0.0338789	-0.337495	0.242803	7.069	182.67	9.19299e-37	3.24126e-35	FBgn0031914	CG5973
RS000722	0.451635	-0.164435	0.15834	0.191736	0.119938	0.170263	9.52212	182.354	1.07316e-36	3.77519e-35	FBgn0001218	Hsc70-3
RS010306	0.381871	-0.14003	-0.0540917	-0.0250143	-0.0412171	0.130208	8.50962	181.581	1.56617e-36	5.49712e-35	FBgn0261014	TER94
RS010933	-0.850535	-0.00805628	0.0909255	0.300224	0.201672	0.029471	7.32381	181.23	1.85928e-36	6.51125e-35	FBgn0085378	CG34349
RS004719	0.975004	0.110812	-0.0841778	-0.010868	0.0252055	-0.147501	6.36262	181.011	2.06911e-36	7.22981e-35	FBgn0040007	RpL38
RS013090	-0.76556	-0.0279234	-0.0624767	-0.0532938	-0.04041	0.0845771	7.48885	180.617	2.50882e-36	8.74663e-35	FBgn0000527	e
RS011538	-0.584832	0.096044	0.0684045	0.148555	0.170642	0.0279292	7.84485	180.591	2.54093e-36	8.82837e-35	FBgn0030648	CG6340
RS003143	-1.4373	-0.0171644	0.24019	0.173564	0.211626	0.179608	10.2788	180.589	2.5436e-36	8.82837e-35	FBgn0002789	Mp20
RS006876	-1.40628	-0.102349	0.272441	0.175769	-0.16654	0.0456412	10.5169	180.236	3.02401e-36	1.04725e-34	FBgn0086687	desat1
RS000804	-0.776898	0.458532	-1.00551	-1.40056	0.492065	-0.331497	5.16678	180.073	3.27485e-36	1.1316e-34	FBgn0036831	CG6839
RS002061	-0.90604	-0.125839	0.299422	0.073844	0.0271341	0.080355	5.49802	179.926	3.51845e-36	1.21309e-34	FBgn0034067	CG8399
RS012161	0.536797	0.0329241	-0.122494	0.109228	0.0084447	-0.0365193	8.02824	179.833	3.68219e-36	1.26674e-34	FBgn0039359	RpL27
RS006456	-0.631177	0.00729016	0.207032	0.102644	0.0593875	0.038107	6.94555	179.68	3.96861e-36	1.36226e-34	FBgn0019968	Khc-73
RS012753	1.10018	0.232565	-0.468099	-0.417822	-0.265067	-0.3509	7.38495	178.906	5.79404e-36	1.98449e-34	NA	NA
RS005416	-1.07924	-0.126099	-0.393625	-0.560465	-0.702993	0.0996463	6.2183	178.65	6.56597e-36	2.24395e-34	FBgn0037684	CG8129
RS013242	0.550428	-0.0427542	0.0899876	0.299124	0.477325	0.0496031	6.30999	178.377	7.50156e-36	2.55808e-34	FBgn0029778	RhoGAP5A
RS012687	-1.21472	0.0950553	-0.255223	-0.723454	-0.80063	0.115653	14.9932	178.129	8.46926e-36	2.88177e-34	FBgn0003372	Sgs1
RS007595	-0.840336	-0.0342378	-0.194183	-0.427491	0.0575817	0.0746422	7.26328	178.023	8.92064e-36	3.02874e-34	FBgn0040001	CG17374
RS013327	2.6722	0.422539	-1.48793	-1.09201	-0.704257	-0.886069	2.32108	177.804	9.92725e-36	3.36318e-34	FBgn0035539	slow
RS006957	-2.06207	-0.181478	-0.361465	0.14985	0.0947304	0.907684	8.26471	177.38	1.22175e-35	4.13011e-34	FBgn0053196	dp
RS011572	-2.10871	-0.756495	0.930041	0.469849	0.784427	1.06797	4.94856	177.302	1.26938e-35	4.28183e-34	FBgn0051439	Muc96D
RS014950	-1.09161	0.0585405	0.555233	0.42145	0.571617	0.178374	12.4063	177.207	1.32937e-35	4.47448e-34	FBgn0005666	bt
RS007964	1.15132	0.0219102	0.580924	0.65238	0.777684	0.0667466	8.43961	177.166	1.35633e-35	4.55539e-34	FBgn0039801	Npc2h
RS010573	-1.13492	-0.309064	0.495699	0.292068	0.257052	0.426101	5.35591	176.472	1.90376e-35	6.38027e-34	FBgn0015039	Cyp9b2
RS001130	0.632694	0.0829757	-0.0212799	0.162024	0.0789942	-0.0468776	9.16442	176.162	2.21531e-35	7.40846e-34	FBgn0039857	RpL6
RS001463	-0.492165	0.177755	0.168661	0.189502	0.193812	-0.0682728	7.22861	175.667	2.82169e-35	9.4161e-34	FBgn0025726	unc-13
RS014811	-1.75569	-0.347	-0.169908	-0.63602	-0.960766	0.463998	3.20737	175.486	3.08351e-35	1.02678e-33	FBgn0038395	CG10407
RS007395	-1.16592	-0.021506	-0.374127	-0.439702	0.146734	-0.0896732	7.73195	175.194	3.55561e-35	1.18146e-33	FBgn0260004	Snmp1
RS007835	2.61158	0.493852	-1.13904	-1.56472	-0.130854	-0.353643	5.9434	174.774	4.36532e-35	1.44743e-33	FBgn0028424	JhI-26
RS006609	0.926137	-0.0912538	0.179811	0.123339	-0.0632566	0.14116	8.88049	174.725	4.47175e-35	1.47957e-33	FBgn0038535	alt
RS003374	-1.08617	-0.0623621	0.428214	0.17823	0.0848956	-0.0683613	5.28163	174.495	5.00499e-35	1.65249e-33	FBgn0032713	CG17323
RS012120	0.937629	0.0812389	-0.0334882	0.0894079	0.0841088	-0.128083	6.33543	174.124	5.99956e-35	1.97668e-33	FBgn0032050	CG13096
RS003917	1.46581	-0.0529246	0.170674	0.0244035	0.0464367	-0.0536927	6.27791	173.887	6.73457e-35	2.21417e-33	FBgn0041607	asparagine-synthetase
RS006262	-0.807264	-0.105028	-0.213152	0.107432	-0.127923	0.0617903	6.5546	173.11	9.84328e-35	3.22943e-33	FBgn0034145	CG5065
RS004129	-0.81957	0.124939	-0.0980598	-0.122209	-0.180245	0.101	8.30126	172.97	1.05438e-34	3.45197e-33	FBgn0029690	CG6414
RS007162	0.86858	-0.187185	0.263784	0.13742	0.0880314	0.109035	6.49968	172.714	1.19471e-34	3.90321e-33	FBgn0031149	CG1518
RS004235	0.886039	0.110685	0.140372	0.0991451	0.0328544	0.0127669	5.36821	172.619	1.25174e-34	4.081e-33	FBgn0038234	mRpL11
RS004116	-1.23281	-0.33042	-0.50022	-0.494466	-0.600277	0.557517	8.29075	172.448	1.36025e-34	4.42551e-33	FBgn0027560	Tps1
RS005837	-2.09038	-0.232845	-0.213489	-0.349346	-0.398697	0.14013	4.846	172.278	1.4786e-34	4.80051e-33	FBgn0033058	CCHa2r
RS006807	0.644907	-0.176796	-0.489469	-0.474733	-0.711132	0.208307	7.5462	172.052	1.6512e-34	5.34973e-33	FBgn0033518	Prx2540-2
RS000363	-1.36371	0.115632	-0.670333	-1.1047	-1.37215	-0.0627107	3.51625	172.011	1.68424e-34	5.44547e-33	FBgn0054038	CG34038
RS014890	-3.18453	0.254148	0.24172	0.221846	0.129035	0.190296	1.78587	171.916	1.76455e-34	5.69331e-33	FBgn0033932	Dh44-R1
RS007594	-0.732403	-0.0021905	-0.0109585	-0.399048	0.10384	0.0207876	9.86226	171.724	1.93738e-34	6.23804e-33	FBgn0040001	CG17374
RS015299	6.99553	0.0295693	5.88143	5.51569	5.44527	-2.23025	0.451852	171.582	2.07651e-34	6.67224e-33	FBgn0264089	sli
RS007498	8.80332	2.87901	7.94949	7.47109	6.78032	-4.79755	1.90679	171.375	2.2983e-34	7.36968e-33	FBgn0035360	CG1246
RS009616	-1.36839	-0.265893	0.120033	-0.180562	0.24251	0.31807	4.34129	171.282	2.40458e-34	7.69466e-33	NA	NA
RS002430	-0.528006	-0.031677	-0.282245	-0.236976	-0.319001	0.0641132	8.2761	171.066	2.67278e-34	8.53537e-33	FBgn0040064	yip2
RS014605	-1.30599	-0.0907618	0.0529588	-0.0798241	0.0551222	-0.129055	3.92313	171.02	2.7332e-34	8.71046e-33	FBgn0032856	CG16798
RS007516	-0.978322	0.0955695	-0.232598	-0.145578	-0.128857	0.0517607	13.4269	170.958	2.81766e-34	8.96131e-33	FBgn0000046	Act87E
RS013481	12.1197	0.626767	11.3149	10.6319	9.50988	-2.75497	6.23678	170.793	3.05288e-34	9.68963e-33	FBgn0028920	CG8997
RS001900	0.766207	0.0259548	-0.197013	-0.109523	0.0139351	-0.0458071	6.91932	170.138	4.2043e-34	1.3317e-32	FBgn0003261	Rm62
RS014220	-1.2654	-0.149983	0.696583	-0.191267	-0.342086	0.105551	10.0688	169.97	4.56342e-34	1.44252e-32	FBgn0028985	Spn4
RS003833	11.6209	0.0257885	10.6994	10.4778	8.75587	-2.16171	4.36337	169.861	4.81422e-34	1.51872e-32	NA	NA
RS007709	0.585855	-0.0258141	0.098936	0.108833	0.133101	-0.000971183	7.72486	169.857	4.82396e-34	1.51872e-32	FBgn0042696	NfI
RS004136	-1.8185	0.139558	-0.549967	-1.09959	-1.10901	0.236372	11.1719	169.388	6.06447e-34	1.90542e-32	FBgn0036659	CG9701
RS009640	1.43524	0.14845	-0.13086	-0.299033	-0.0647293	-0.500872	4.67234	169.116	6.92482e-34	2.17135e-32	FBgn0004556	Dbp73D
RS011703	-1.08432	-0.00565624	0.738373	0.759579	0.765177	0.0388461	5.39752	169.045	7.17192e-34	2.24432e-32	FBgn0026059	Mhcl
RS009372	-1.03116	0.025132	-0.121177	-0.122209	-0.196846	0.165094	5.3518	168.778	8.16963e-34	2.55141e-32	FBgn0086367	t
RS002147	-0.992499	-0.086754	-0.0178836	-0.365435	0.092299	0.0549819	6.194	168.415	9.75217e-34	3.03956e-32	FBgn0027508	tankyrase
RS011850	-0.899664	-0.0113712	-0.154892	-0.111279	-0.205554	0.162538	7.3402	168.148	1.11115e-33	3.45633e-32	FBgn0030745	CG4239
RS010814	9.12784	0.0781069	8.41932	7.62208	7.09243	-1.79936	2.16553	167.513	1.51484e-33	4.70265e-32	FBgn0010425	epsilonTry
RS014698	-1.17716	-0.120783	-0.602358	-0.287285	-0.779201	0.183131	10.2261	167.351	1.63943e-33	5.07929e-32	FBgn0034539	CG11159
RS009820	0.714923	0.0342214	-0.108485	-0.0467626	-0.0627262	-0.069475	9.60722	167.329	1.65767e-33	5.12564e-32	FBgn0020910	RpL3
RS012107	-1.29848	-0.0772429	-0.774349	-0.521775	-0.783141	0.435315	4.81968	167.051	1.8979e-33	5.85679e-32	FBgn0039061	Ir
RS010812	11.6081	0.0511224	8.79137	8.32916	7.7243	-1.66887	7.61512	166.789	2.15722e-33	6.64391e-32	FBgn0003863	alphaTry
RS010165	1.31092	-0.186896	0.391976	0.269953	0.238758	0.683974	7.71255	166.647	2.31165e-33	7.10548e-32	FBgn0025454	Cyp6g1
RS002849	0.633956	0.00826131	-0.0274215	0.0229706	-0.00539362	-0.0543483	6.57341	166.641	2.31825e-33	7.11175e-32	FBgn0032138	CG4364
RS011062	2.60493	-0.197442	0.0483697	-0.194105	0.231655	0.297445	2.12206	166.573	2.39663e-33	7.33773e-32	NA	NA
RS006819	-1.26104	-0.18828	0.467805	0.832663	0.692962	0.378449	6.52245	166.549	2.4258e-33	7.41249e-32	FBgn0031975	Tg
RS015477	-1.07455	0.126294	0.232113	0.150143	0.21613	-0.0197596	7.54666	166.424	2.57807e-33	7.86237e-32	FBgn0027580	CG1516
RS009537	1.34804	0.180776	0.389642	0.372338	0.309912	0.0369833	6.52008	166.188	2.89235e-33	8.8036e-32	FBgn0000032	Acph-1
RS000475	-0.807228	-0.228184	0.208118	0.0428742	0.0816595	0.161231	6.11769	165.902	3.32604e-33	1.01039e-31	FBgn0040319	Gclc
RS005437	-1.16101	0.224158	0.290648	0.523981	0.658818	-0.0683923	6.20452	165.835	3.43599e-33	1.04176e-31	FBgn0031700	CG14022
RS011216	-0.552906	-0.0689045	0.0083439	0.0146418	-0.0370961	0.145299	7.92091	165.767	3.55216e-33	1.07489e-31	FBgn0033484	CG2269
RS002298	0.856964	-0.0947616	0.0253284	-0.0126872	-0.0671732	-0.0343809	5.59304	165.423	4.2018e-33	1.26901e-31	FBgn0036756	cln3
RS003150	-1.1597	-0.12628	-0.352545	-0.204388	-0.156765	0.109375	5.92996	165.359	4.33609e-33	1.30703e-31	FBgn0033302	Cyp6a14
RS005710	5.95536	0.773118	8.18064	7.23645	7.23911	-2.84588	2.11741	165.258	4.55544e-33	1.3705e-31	FBgn0032810	CG13077
RS012059	1.06085	0.0627105	-0.168419	0.261287	0.144997	0.469821	7.25734	164.879	5.47985e-33	1.64543e-31	FBgn0029823	CG3011
RS001613	-1.58068	-0.0513282	0.636996	0.0201206	0.0375624	0.0802631	4.31109	164.779	5.75384e-33	1.72438e-31	FBgn0030156	CG15247
RS015391	-0.844732	0.171147	0.122253	-0.126525	-0.126542	-0.186909	5.92084	164.108	7.98349e-33	2.388e-31	FBgn0027601	pdgy
RS010766	5.05111	1.73823	-1.33117	-1.71342	-0.611892	-2.06702	1.84832	164.02	8.33268e-33	2.48767e-31	NA	NA
RS010494	-0.619917	-0.00525306	0.316095	-0.329305	-0.503582	0.0737161	9.32242	163.672	9.87525e-33	2.94256e-31	FBgn0010225	Gel
RS011966	-0.807216	0.0657842	0.514913	0.381229	0.115806	-0.00721805	5.53823	163.307	1.1801e-32	3.50967e-31	FBgn0033633	CG7759
RS014447	2.39901	-0.121314	0.595056	-0.0847104	0.110403	-0.607892	3.76025	163.187	1.25093e-32	3.71324e-31	FBgn0039109	CG10365
RS013335	10.9416	-0.176319	11.462	11.4456	11.0995	-1.86319	5.65133	162.821	1.49595e-32	4.43211e-31	FBgn0035781	CG8560
RS009652	-0.421558	0.0349459	0.221463	0.28595	0.326532	0.0834126	8.09734	162.368	1.86572e-32	5.51714e-31	FBgn0031869	CG18304
RS007457	-0.949951	-0.0992083	0.244383	0.0297675	-0.0893325	0.285015	9.74786	162.009	2.22326e-32	6.56199e-31	NA	NA
RS013048	0.564332	-0.00271706	-0.021023	0.00125286	0.00514652	-0.149258	7.93841	161.482	2.8742e-32	8.4672e-31	FBgn0005674	Aats-glupro
RS006397	2.324	-0.148668	-1.25211	-1.65466	-0.610078	-0.67283	2.19321	161.266	3.19357e-32	9.39029e-31	FBgn0001112	Gld
RS000255	-0.61433	0.074451	-0.0725783	0.112114	0.0520816	-0.305494	5.7273	161.156	3.36978e-32	9.88976e-31	FBgn0035189	CG9119
RS004450	1.30687	-0.248632	0.679294	0.764603	0.116174	0.567208	6.49021	160.903	3.81212e-32	1.11669e-30	FBgn0015032	Cyp4c3
RS005110	1.56831	-0.290285	-0.294174	-0.216641	-0.331194	-0.0473605	3.65112	160.603	4.41326e-32	1.29036e-30	FBgn0002733	HLHmbeta
RS003322	5.46462	-1.28986	7.52099	7.29404	6.62814	-0.340534	1.6041	160.386	4.90653e-32	1.4319e-30	FBgn0034558	CG9236
RS014063	-1.53175	-0.0850059	-0.126956	-0.600972	-0.717734	-0.0121577	4.4796	160.131	5.55643e-32	1.61853e-30	FBgn0020765	Acp65Aa
RS009614	-1.0611	-0.0673788	0.208675	-0.0174477	-0.0720239	0.15283	7.8414	160.063	5.74176e-32	1.66939e-30	NA	NA
RS013417	-0.613855	-0.10096	0.193376	0.088366	0.216717	0.074819	7.20853	159.944	6.08504e-32	1.76591e-30	FBgn0085443	spri
RS008163	9.37883	0.0303466	6.09564	5.76939	5.07727	-1.51422	2.48369	159.918	6.16215e-32	1.78496e-30	FBgn0038098	CG7381
RS001804	-0.707682	0.0096066	0.119674	0.116279	0.0227084	0.0207224	6.21424	159.571	7.29893e-32	2.11032e-30	FBgn0027073	CG4302
RS004449	-1.68355	-0.0648538	0.221043	0.239834	-0.142339	0.295804	8.00538	159.298	8.33855e-32	2.40644e-30	FBgn0015032	Cyp4c3
RS000611	7.80216	0.0967142	0.424413	-0.727415	-1.08161	-0.0059659	1.63772	159.289	8.3767e-32	2.41299e-30	NA	NA
RS004851	11.7831	1.32599	9.38977	9.43554	8.42784	-2.86895	6.61232	158.985	9.71312e-32	2.79279e-30	NA	NA
RS009935	-1.42617	-0.0679807	0.508357	0.41412	0.410089	0.284432	6.68334	158.515	1.22165e-31	3.50612e-30	FBgn0035917	Zasp66
RS013469	-1.1111	0.277764	-0.706823	0.989641	1.73827	0.0657265	4.75529	157.935	1.62102e-31	4.64376e-30	FBgn0034487	Efhc1.2
RS003551	0.664981	-0.0855815	0.347194	0.333613	0.223301	0.169867	6.03296	157.418	2.08557e-31	5.96358e-30	FBgn0038349	CG6045
RS007374	-0.70196	0.0621187	-0.00433332	0.00910181	-0.0932043	0.0406874	12.1911	157.347	2.15897e-31	6.16215e-30	FBgn0004169	up
RS010353	-1.60609	-0.027903	-0.386629	0.157139	0.0321473	0.369645	4.14557	157.252	2.26119e-31	6.44212e-30	FBgn0085476	CG34447
RS006274	4.30274	-1.73178	7.58668	7.08017	6.75159	-0.0064864	1.66957	157.243	2.27091e-31	6.45801e-30	FBgn0031146	CG15449
RS006654	0.744322	0.000344479	-0.169339	-0.0211229	0.0282921	0.0266911	6.14793	157.197	2.32196e-31	6.59115e-30	FBgn0011638	La
RS002048	-0.898995	0.00740704	-0.156889	-0.168055	-0.346275	0.301136	8.60258	156.367	3.48017e-31	9.8609e-30	FBgn0033250	CG14762
RS002201	-1.12853	-0.160642	0.0827885	0.126827	-0.0156299	0.274142	7.00661	156.338	3.52937e-31	9.98217e-30	FBgn0031449	CG31689
RS001185	-1.81283	-0.045505	1.41077	0.310576	0.679748	0.207364	2.34662	156.324	3.55357e-31	1.00324e-29	FBgn0034145	CG5065
RS003207	-1.43951	0.0978543	0.138208	0.1117	-0.133834	0.210208	6.00686	156.268	3.65254e-31	1.02932e-29	FBgn0015032	Cyp4c3
RS014433	-1.29884	-0.172847	-0.111295	-0.240314	0.0550175	0.0598125	5.30949	155.559	5.15964e-31	1.45141e-29	FBgn0033603	Cpr47Ef
RS014240	-1.06815	0.250312	-0.408702	-0.435714	-0.582653	-0.115109	4.87661	155.545	5.19555e-31	1.45887e-29	NA	NA
RS002821	3.91899	-1.50696	3.27417	4.16225	3.15839	0.398217	0.688968	155.528	5.2398e-31	1.46865e-29	FBgn0013770	Cp1
RS012490	-0.837049	0.0134348	0.130634	0.242219	0.127193	0.0327283	7.10866	155.339	5.74523e-31	1.60743e-29	FBgn0037891	CG5214
RS013509	0.437448	0.0114016	-0.0999473	-0.0606656	-0.0736121	-0.0327244	11.8643	154.607	8.20739e-31	2.29219e-29	FBgn0000557	Ef1alpha100E
RS014221	-1.26096	-0.195362	0.629617	0.727294	0.338277	0.523497	6.4763	154.429	8.94785e-31	2.49451e-29	FBgn0028983	Spn6
RS007511	-0.816173	-0.230528	-0.0658647	0.00927734	-0.0879426	0.321396	9.09271	154.121	1.03979e-30	2.8936e-29	FBgn0026415	Idgf4
RS003595	-1.10963	0.109276	0.0325499	-0.00120868	-0.315931	-0.0767014	4.3742	154.046	1.07836e-30	2.99556e-29	NA	NA
RS008698	1.9161	-0.0877005	-0.383183	-0.681988	-0.524224	-0.0906237	3.986	153.914	1.15026e-30	3.18962e-29	NA	NA
RS007182	-1.04545	0.056763	0.255647	0.0936229	0.0102707	-0.0556703	4.52924	153.77	1.23391e-30	3.41551e-29	FBgn0032673	CG7180
RS004493	0.592128	-0.0519239	-0.0697548	0.102425	0.0309542	0.0923921	6.48367	153.743	1.25006e-30	3.45407e-29	FBgn0004926	eIF-2beta
RS003299	0.601335	-0.0053132	-0.0402718	0.0840566	0.0650124	0.0410609	8.55401	153.656	1.30426e-30	3.59745e-29	FBgn0011272	RpL13
RS006477	-1.05795	-0.361627	0.458565	0.13242	0.036025	0.515459	6.67977	153.453	1.43983e-30	3.96437e-29	FBgn0041713	yellow-c
RS007725	-1.18674	-0.111053	0.232729	-0.407076	-0.557216	0.0640285	7.24501	153.361	1.50607e-30	4.13944e-29	NA	NA
RS006289	1.17899	0.121416	-0.310942	-0.14111	0.00587898	-0.113766	5.90448	153.299	1.55192e-30	4.25794e-29	FBgn0029133	REG
RS005758	10.1065	-0.818579	7.36335	7.19967	6.7568	-1.39713	7.10811	152.514	2.27425e-30	6.2288e-29	FBgn0052656	Muc11A
RS001246	-1.11376	-0.211403	0.0708556	0.0058704	-0.283652	0.125165	5.2005	152.492	2.2992e-30	6.28608e-29	FBgn0050106	CCHa1r
RS007935	-1.61993	-0.123893	0.350875	0.345101	0.0690831	0.528696	6.21955	152.39	2.41575e-30	6.58809e-29	FBgn0261053	Cad86C
RS010472	-0.715118	0.0292848	-0.204759	-0.246308	-0.469995	0.207972	8.21499	152.388	2.41811e-30	6.58809e-29	FBgn0035911	CG6638
RS014081	-0.692283	-0.114165	0.381155	0.206994	0.110876	-0.0735598	6.89204	152.079	2.81147e-30	7.6464e-29	FBgn0261283	HLH106
RS006221	6.74911	0.180028	6.17281	4.11667	4.55006	-2.37524	0.182424	151.552	3.63461e-30	9.86791e-29	FBgn0036940	obst-J
RS011592	-1.49924	-0.0922521	0.144125	-0.0481297	0.0471612	0.0871188	3.62151	151.453	3.81399e-30	1.03369e-28	NA	NA
RS011797	0.642583	-0.0371991	-0.00154823	-0.0240125	0.0410732	0.0150927	6.50047	151.293	4.12286e-30	1.11546e-28	FBgn0027080	Aats-tyr
RS012092	-1.2277	-0.366988	-0.0379715	-0.461368	-0.380307	0.611257	5.73831	150.844	5.12913e-30	1.38531e-28	FBgn0041712	yellow-d
RS003832	2.19823	0.435853	0.859605	0.268178	0.276419	-0.405695	3.31984	150.822	5.18615e-30	1.39829e-28	FBgn0039311	CG10513
RS004906	0.740718	-0.0228182	0.377971	0.189326	0.285659	0.247869	6.61101	150.718	5.45591e-30	1.46848e-28	FBgn0261862	whd
RS008571	0.726767	-0.0175158	-0.0104608	0.0100797	0.0140669	0.0162752	7.07967	150.632	5.68805e-30	1.52832e-28	FBgn0034967	eIF-5A
RS008591	-1.0681	0.0563339	0.249948	0.166066	0.10758	0.197031	6.20935	150.378	6.43645e-30	1.72643e-28	FBgn0259678	sqa
RS009058	4.55482	-0.808203	4.57516	3.10639	4.32467	-0.772833	0.539957	150.273	6.77305e-30	1.81359e-28	FBgn0039728	CG7896
RS009347	10.3882	-2.11114	8.51	8.19539	7.65267	0.709951	5.69952	150.158	7.164e-30	1.91499e-28	FBgn0032144	CG17633
RS005739	10.5195	-2.12323	8.67928	8.48101	7.68434	0.378335	5.65564	149.845	8.34415e-30	2.22663e-28	FBgn0261803	CG42749
RS012664	-1.01189	0.0323797	1.54027	1.16538	1.01309	-0.274068	3.3207	149.776	8.62752e-30	2.29831e-28	FBgn0029994	CG2254
RS011537	0.57149	0.00603643	-0.170964	-0.152638	-0.110381	-0.0724126	7.64616	149.34	1.06689e-29	2.83728e-28	FBgn0027329	Tcp-1zeta
RS010158	0.900252	-0.845883	-0.82312	-2.30962	-2.99658	1.66844	3.11777	149.292	1.09187e-29	2.89875e-28	FBgn0040827	CG13315
RS008769	0.736386	-0.130271	-0.244279	-0.161458	-0.0875688	0.111978	5.33273	148.575	1.54804e-29	4.10282e-28	FBgn0023167	SmD3
RS006222	9.12466	-2.06193	9.69114	9.01862	8.68616	0.595785	5.93764	148.523	1.58787e-29	4.20125e-28	FBgn0036203	Muc68D
RS004292	0.572376	-0.0642969	-0.0661552	-0.0264065	-0.00900852	0.00804182	8.30222	148.484	1.6186e-29	4.2753e-28	FBgn0010621	Cct5
RS014036	-0.435507	0.0256833	-0.120657	-0.181173	-0.0974499	0.0302888	8.44828	148.442	1.65179e-29	4.35558e-28	FBgn0023479	Tequila
RS009396	6.24595	1.02849	4.47076	3.77588	3.94818	-4.42348	2.17582	148.191	1.86597e-29	4.91204e-28	FBgn0250815	Jon65Aiv
RS001009	-1.27897	-0.148131	0.16626	0.432145	0.398181	0.137195	4.75445	147.726	2.34091e-29	6.1519e-28	FBgn0002570	Mal-A1
RS014839	-0.434729	-0.0254363	0.0320737	0.132935	0.150374	0.0640683	7.47758	147.713	2.35476e-29	6.17787e-28	FBgn0259099	DCX-EMAP
RS004231	-1.0124	0.0281147	0.119331	0.120501	0.0619684	0.166151	8.8949	147.33	2.83742e-29	7.43166e-28	FBgn0020439	fau
RS009629	-0.363583	0.0319626	-0.248464	-0.309528	-0.439481	0.0246285	8.20114	147.183	3.04778e-29	7.96924e-28	FBgn0039358	CG5028
RS005022	-1.33106	-0.000189443	0.215116	0.0591641	0.117491	0.308361	4.43961	147.113	3.15328e-29	8.23127e-28	FBgn0031973	Spn28D
RS007344	-0.690224	0.0488334	-0.0158411	0.0577367	-0.0406724	0.0554717	10.89	146.729	3.80236e-29	9.90902e-28	FBgn0004117	Tm2
RS006150	-0.511829	-0.0175248	0.190174	0.108905	0.134307	-0.025831	7.25067	146.376	4.51415e-29	1.17443e-27	FBgn0027621	Pfrx
RS008612	-1.36037	-0.0186454	-0.177801	-0.0938949	-0.37594	0.147636	4.10715	146.025	5.35414e-29	1.39065e-27	FBgn0030816	CG16700
RS003603	-1.05611	0.0456171	0.0148424	0.155738	0.284423	-0.207204	4.94411	145.861	5.80023e-29	1.50401e-27	NA	NA
RS010082	0.785367	0.0868058	-0.117557	-0.0621484	-0.0376381	-0.193595	7.79804	145.809	5.94711e-29	1.53953e-27	FBgn0000150	awd
RS012318	-0.875652	-0.034487	0.205024	0.0748225	0.117838	0.17693	8.03989	145.657	6.40446e-29	1.65518e-27	FBgn0028494	CG6424
RS012907	-1.20135	0.1037	0.840269	0.60362	0.729634	0.214923	4.50011	145.62	6.52092e-29	1.68248e-27	FBgn0026061	Mipp1
RS007163	-1.36449	-0.102968	1.0444	0.506716	1.0628	-0.0399631	7.58018	145.159	8.16185e-29	2.10238e-27	FBgn0037661	Ada
RS002011	5.69668	1.81429	2.42192	0.698628	2.36775	-2.95696	0.994591	144.959	8.99225e-29	2.31246e-27	FBgn0243486	rdo
RS008102	1.26785	0.0742396	-0.437916	-0.376087	-0.20155	-0.309807	4.51487	144.416	1.17148e-28	3.00764e-27	FBgn0031717	Oscillin
RS009028	-0.481505	0.0519551	0.0616913	0.054191	0.0660024	-0.0816043	7.60932	144.367	1.19923e-28	3.07382e-27	FBgn0020240	Mcr
RS010619	7.3146	-0.359859	7.05115	6.66679	6.58139	-1.31627	3.28742	144.276	1.25366e-28	3.20806e-27	NA	NA
RS010776	0.852537	0.0321259	0.104128	0.0816236	-0.0143107	0.239123	5.67205	144.269	1.25821e-28	3.21441e-27	FBgn0025625	Sik2
RS002169	0.280318	0.303967	-0.677101	0.650372	-0.662317	-0.520505	4.4091	144.23	1.28196e-28	3.26487e-27	FBgn0004893	bowl
RS011729	1.32018	-0.0358339	0.477538	0.604575	0.294878	0.121024	5.01651	144.23	1.28215e-28	3.26487e-27	NA	NA
RS012283	-0.49467	-0.129005	0.121549	0.0428424	0.0705138	0.176231	9.42292	144.194	1.30458e-28	3.31658e-27	FBgn0035544	CG15021
RS003669	-1.23074	-0.00580374	0.0102004	-0.153314	-0.236836	0.0352792	4.36923	144.093	1.37072e-28	3.47904e-27	FBgn0033204	CG2065
RS013230	8.73698	0.0183503	7.88029	7.69001	6.66827	-1.6708	1.84423	144.041	1.40576e-28	3.56218e-27	FBgn0003410	sina
RS010767	4.12715	0.963513	-1.22547	-1.3591	0.344177	-1.12887	5.07644	143.924	1.48779e-28	3.76391e-27	FBgn0051728	CG31728
RS004717	-0.897821	-0.152272	0.871858	0.331266	0.470639	0.357187	6.68222	143.71	1.65131e-28	4.17084e-27	FBgn0029948	CheA7a
RS001360	-0.581784	0.0141807	0.276356	0.300856	0.173093	0.0117723	7.57657	143.455	1.86929e-28	4.71375e-27	FBgn0261788	Ank2
RS009335	-1.12429	-0.0198418	-0.275025	0.0247575	-0.15622	0.102896	6.97668	142.891	2.45894e-28	6.19065e-27	FBgn0260746	Ect3
RS015541	0.473968	0.655292	2.03979	4.48491	3.56499	-0.355272	1.62941	142.685	2.71804e-28	6.83192e-27	NA	NA
RS014109	-1.76882	0.0246674	0.05646	-0.16705	-0.470693	0.357288	11.6928	142.451	3.04547e-28	7.6426e-27	NA	NA
RS010600	-1.09737	-0.115871	0.340219	0.225665	0.124743	0.241765	5.90021	142.277	3.3135e-28	8.30187e-27	FBgn0038037	Cyp9f2
RS011967	-1.38941	-0.0232092	-0.570593	-0.536818	-0.520545	0.0708901	6.65212	141.947	3.89055e-28	9.73198e-27	FBgn0034943	Fmo-1
RS014862	-0.567113	0.0376375	0.333109	0.218707	0.189726	0.042551	10.9974	141.888	4.00451e-28	1.0001e-26	FBgn0000667	Actn
RS008791	0.724796	-0.138744	0.101601	-0.00997292	-0.0399011	0.0915694	7.08724	141.568	4.6775e-28	1.16631e-26	FBgn0014868	Ost48
RS011607	6.26531	-1.71086	7.21854	6.48165	6.53848	0.0771901	1.32952	141.263	5.42483e-28	1.35049e-26	FBgn0028833	Dak1
RS009572	-0.357796	-0.529588	4.50877	0.873591	1.78972	0.99564	0.819005	141.048	6.02119e-28	1.49656e-26	FBgn0039228	CG6980
RS012613	0.93887	-0.00460107	-0.0579149	-0.0915541	-0.0800745	-0.0453753	10.2654	140.997	6.17444e-28	1.5322e-26	FBgn0026721	fat-spondin
RS014753	-0.55792	0.193224	0.412447	0.244562	0.385662	-0.160166	7.2067	140.727	7.03836e-28	1.74381e-26	NA	NA
RS014241	-0.463626	0.104387	-0.268649	-0.378103	-0.408875	-0.159312	7.20766	140.685	7.18458e-28	1.77721e-26	FBgn0027594	drpr
RS015208	-0.659215	0.00522478	-0.177169	-0.132322	-0.173298	-0.0523457	6.92167	140.498	7.86622e-28	1.94274e-26	FBgn0032075	Tsp29Fb
RS011333	9.89772	-0.00856948	6.66599	6.72052	6.11844	-0.877409	3.15504	140.488	7.90505e-28	1.94925e-26	NA	NA
RS000042	1.22152	-0.271688	0.593093	0.396614	0.458878	0.522103	3.27243	140.327	8.54878e-28	2.10465e-26	NA	NA
RS014906	0.500937	-0.06274	-0.0339931	0.0230177	0.033861	-0.0131845	7.14604	140.018	9.9339e-28	2.4418e-26	FBgn0036258	CG5642
RS000057	1.20961	0.0551604	-0.0460648	-0.171837	0.0792656	-0.000891875	6.5928	139.852	1.07674e-27	2.6425e-26	FBgn0037137	Nopp140
RS001764	-0.745277	-0.136074	-0.830262	-0.472208	-0.565348	-0.289336	6.87408	139.646	1.19022e-27	2.91642e-26	FBgn0263830	CG40486
RS005023	-0.562073	0.121593	0.0223803	-0.0170942	-0.184302	0.0018416	9.18349	139.603	1.21571e-27	2.9742e-26	FBgn0263289	scrib
RS009186	11.2496	-0.0180547	10.1331	10.3117	9.25265	-1.74314	4.15959	139.499	1.27872e-27	3.12345e-26	FBgn0031976	CG7367
RS000986	-1.06062	-0.123744	-0.110668	-0.119537	-0.0588141	0.137366	6.48912	139.482	1.28933e-27	3.14444e-26	FBgn0001992	Cyp303a1
RS008593	0.562881	-0.0410688	-0.132926	-0.125386	-0.0991883	0.0671233	8.10977	139.431	1.32139e-27	3.21759e-26	FBgn0030086	CG7033
RS010874	-1.13464	0.103088	-0.214912	-0.335704	-0.0920617	-0.233414	5.05817	139.138	1.52368e-27	3.70438e-26	FBgn0027547	CG1927
RS012275	-0.625002	0.114637	-0.266004	-0.158402	-0.239226	-0.106155	6.11936	138.955	1.66549e-27	4.04283e-26	FBgn0261244	inaE
RS010842	-1.36344	-0.250002	0.542084	1.47214	1.41124	0.400736	2.86008	138.893	1.71605e-27	4.15909e-26	FBgn0038294	Mf
RS002520	1.6586	-0.128008	-0.458295	-0.0737024	-0.237825	0.293999	2.99325	138.802	1.7937e-27	4.34053e-26	NA	NA
RS012132	-1.14704	0.0652052	0.342223	0.282597	0.224277	-0.087252	4.94635	138.714	1.87171e-27	4.52228e-26	FBgn0010497	dmGlut
RS002655	-0.622587	0.0159174	-0.461231	-0.55871	-0.484206	-0.235877	7.40449	138.576	2.00154e-27	4.82848e-26	FBgn0052372	ltl
RS006266	9.52942	0.0560185	8.79953	8.23447	7.39307	-1.68999	2.55907	138.571	2.00647e-27	4.83289e-26	FBgn0011554	etaTry
RS009913	0.774916	0.117357	-0.156225	-0.0449974	-0.136172	-0.14193	7.34383	138.441	2.13733e-27	5.14014e-26	FBgn0027088	Aats-gly
RS002910	-1.13984	-0.202587	0.392306	0.34331	0.340027	0.417029	5.55063	138.333	2.25302e-27	5.41002e-26	FBgn0038037	Cyp9f2
RS014893	-1.31628	-0.135299	0.251334	-0.188324	-0.161141	0.398854	7.65718	137.741	3.00338e-27	7.20072e-26	FBgn0011279	Pbprp1
RS001521	-0.887142	-0.20391	0.18384	0.119691	0.00325887	0.306661	5.38947	137.688	3.08181e-27	7.3774e-26	FBgn0037720	CG8312
RS002439	0.693901	-0.0424792	-0.119095	0.033819	0.0855656	0.00639082	5.9329	137.586	3.23784e-27	7.73903e-26	FBgn0035147	Gale
RS006066	-2.18823	0.0415648	0.545105	0.121995	0.409456	-0.39984	3.40735	137.242	3.82691e-27	9.13302e-26	FBgn0022359	Sodh-2
RS008709	0.66663	-0.0326731	-0.0413065	-0.0661891	-0.266008	0.428068	9.07151	136.987	4.33049e-27	1.0319e-25	FBgn0037801	CG3999
RS003666	-0.38821	0.134143	0.0683698	0.0507518	0.136448	-0.0208385	8.54778	136.589	5.25562e-27	1.25044e-25	FBgn0261041	stj
RS000044	1.52707	0.332738	0.383118	0.304188	0.544856	-0.211448	3.64719	136.481	5.53868e-27	1.31577e-25	NA	NA
RS006967	-0.994525	-0.492148	0.657913	1.69407	1.0671	0.861551	5.88119	136.456	5.6041e-27	1.32929e-25	FBgn0032285	CG17108
RS006837	9.59652	1.58322	8.85866	8.41031	7.34552	-3.21965	2.57651	135.844	7.54551e-27	1.78707e-25	FBgn0034717	CG5819
RS001936	0.667698	-0.00227433	-0.162396	-0.133131	-0.0793274	-0.0367322	7.47565	135.71	8.05052e-27	1.90378e-25	FBgn0015019	Cctgamma
RS009436	7.48941	0.0647555	6.60024	5.87589	5.81941	-1.97551	0.84995	135.694	8.11275e-27	1.91559e-25	FBgn0024997	CG2681
RS014856	0.58848	-0.0871402	-0.0677193	0.0487329	-0.0492136	-0.0166607	6.60463	135.269	9.97488e-27	2.35172e-25	FBgn0027084	Aats-lys
RS010843	-1.11928	-0.00944879	0.334672	0.381839	0.352445	0.12832	9.19521	135.261	1.00116e-26	2.3568e-25	FBgn0038294	Mf
RS001184	-1.97732	0.0876862	0.327108	0.202308	0.363251	0.162104	2.5001	135.199	1.03183e-26	2.42535e-25	FBgn0034145	CG5065
RS003235	0.77139	-0.0908125	-0.123417	-0.0785336	0.0138667	-0.0232426	6.01983	135.15	1.05689e-26	2.4805e-25	FBgn0033557	CG12325
RS011298	-0.709611	0.0285576	0.209647	0.319196	0.252271	0.0112784	8.05376	135.067	1.0999e-26	2.57756e-25	FBgn0038774	CG5023
RS010611	-1.06995	-0.0596809	-0.149842	-0.0205261	-0.150735	0.355005	6.51859	134.844	1.22566e-26	2.86797e-25	FBgn0038037	Cyp9f2
RS009442	-2.04915	-0.382798	0.0695632	0.329618	0.141767	0.573237	3.06247	134.603	1.37798e-26	3.21956e-25	FBgn0003410	sina
RS000612	4.77263	-1.63408	0.912838	-0.272863	-0.990159	2.03679	0.701467	134.553	1.41187e-26	3.29381e-25	NA	NA
RS006214	0.543722	-0.00333192	-0.143402	-0.0884683	-0.117622	0.0207158	7.42659	134.307	1.59067e-26	3.70539e-25	NA	NA
RS013068	-1.33061	-0.328714	-0.139183	-0.383746	-0.151601	0.393096	5.26343	134.223	1.65745e-26	3.85518e-25	FBgn0000533	ea
RS013389	-0.678346	0.160865	-0.131752	-0.030874	-0.0084819	-0.122518	6.17122	134.186	1.68733e-26	3.91882e-25	FBgn0039877	CG2118
RS011955	0.464261	-0.102092	-0.122146	-0.0787183	-0.175107	0.043249	7.62392	133.903	1.93549e-26	4.4885e-25	FBgn0024183	vig
RS008938	0.381865	-0.0167426	0.0662095	0.171987	0.0724442	0.0573155	9.00035	133.754	2.0811e-26	4.81899e-25	FBgn0001220	Hsc70-5
RS014328	0.426913	-0.01429	-0.0424514	0.0358929	-0.0250762	-0.00197348	8.54199	133.619	2.22179e-26	5.13715e-25	FBgn0026372	RpL23A
RS006134	-2.13741	-0.15993	-0.598295	-0.306108	0.490341	0.151948	3.22005	133.468	2.39057e-26	5.51921e-25	FBgn0000078	Amy-d
RS005292	0.467849	-0.0843886	-0.0321303	-0.0871477	-0.0227302	0.0560698	8.5108	133.425	2.44136e-26	5.62812e-25	FBgn0023143	Uba1
RS014004	4.86612	-0.612294	5.64581	5.35671	5.06709	-0.933941	1.70188	133.265	2.63761e-26	6.07157e-25	FBgn0011556	zetaTry
RS011547	0.65981	0.0265842	-0.140886	-0.111763	-0.131503	0.306905	8.2183	133.185	2.74241e-26	6.3035e-25	FBgn0036030	CG6767
RS004248	-1.33096	0.0241282	-0.155808	-0.637347	-0.661687	0.0893473	3.48346	132.981	3.02695e-26	6.94728e-25	FBgn0050035	Tret1-1
RS003658	0.494374	-0.00481644	-0.0897657	-0.0307982	-0.0688492	0.0229158	8.41299	132.837	3.2469e-26	7.44113e-25	FBgn0052626	CG32626
RS013688	8.51958	-2.18667	7.0575	6.9666	5.35356	0.0141368	5.9055	132.489	3.84461e-26	8.798e-25	FBgn0036232	CG14125
RS001418	0.740015	0.227441	3.81365	1.14166	1.38496	-0.746602	1.35069	132.279	4.25514e-26	9.72317e-25	FBgn0031703	CG12512
RS014540	8.07968	0.0592701	5.45836	4.81603	4.5106	-2.23986	1.25282	132.019	4.8288e-26	1.10179e-24	NA	NA
RS007042	0.824699	-0.0148581	0.0352609	0.0162354	0.0157167	-0.0087968	6.48724	131.978	4.92624e-26	1.12238e-24	FBgn0023529	CG2918
RS002448	1.82075	-0.0256917	0.992114	0.573084	0.142597	0.726567	4.5953	131.882	5.15969e-26	1.17385e-24	FBgn0039620	CG1443
RS006395	9.14283	0.00988718	8.18601	8.06402	7.24748	-1.70048	2.21059	131.822	5.31129e-26	1.20658e-24	FBgn0053966	CG33966
RS011205	1.07214	-0.0758919	-0.922973	-0.393258	-0.422457	0.0813619	15.6021	131.526	6.1327e-26	1.39115e-24	FBgn0002565	Lsp2
RS014654	-2.28769	0.430299	-1.34339	-0.397874	-1.02663	-0.407004	3.5635	131.476	6.28146e-26	1.42282e-24	FBgn0051646	CG31646
RS010339	0.657485	0.0403809	0.214647	-0.170214	0.415901	-0.00911747	5.68285	131.328	6.75002e-26	1.52674e-24	FBgn0038248	CG7886
RS003514	10.6238	1.43881	7.13758	7.87852	6.73335	-3.63875	3.57089	131.217	7.12261e-26	1.60868e-24	FBgn0029826	CG6041
RS011121	0.631008	0.00358358	0.170568	0.0507557	0.0635942	0.0271724	6.85072	131.115	7.48565e-26	1.68823e-24	FBgn0050291	CG30291
RS010928	0.721554	0.0939717	-0.0439581	0.127242	0.0814451	-0.0660614	8.60219	130.973	8.01974e-26	1.80606e-24	FBgn0036825	RpL26
RS011828	1.02328	-0.169299	0.0563637	0.11616	0.262889	0.0228198	5.10018	130.674	9.26972e-26	2.08455e-24	NA	NA
RS010135	1.41485	0.0534625	-0.281771	-0.00605624	-0.0132074	-0.027269	8.70456	130.449	1.03398e-25	2.32184e-24	FBgn0001208	Hn
RS012599	-0.654086	-0.0554005	0.0204933	0.189218	0.229174	0.255682	7.85538	130.332	1.09397e-25	2.45301e-24	FBgn0013988	Strn-Mlck
RS005888	0.906101	0.0823003	-0.268157	-0.0917051	-0.0568648	-0.0814791	5.81558	130.305	1.10868e-25	2.48243e-24	FBgn0259937	Nop60B
RS001860	7.29749	0.669537	6.42807	6.05017	5.09967	-3.09729	3.26403	130.02	1.27284e-25	2.8459e-24	FBgn0053985	CG33985
RS015561	0.762617	-0.327055	-0.118362	-0.0218994	-0.0457416	0.429555	6.48692	129.935	1.32653e-25	2.96169e-24	FBgn0037057	CG10512
RS009306	0.705341	-0.0844485	-0.127828	-0.0349263	-0.0153729	0.0210303	7.72234	129.735	1.46141e-25	3.25816e-24	FBgn0033342	CG8258
RS004504	0.707166	0.0385111	-0.132012	-0.122087	-0.0953104	-0.101507	8.0308	129.635	1.53452e-25	3.41629e-24	FBgn0003676	T-cp1
RS001966	-0.986002	-0.105457	0.203827	0.4338	0.211146	-0.0294745	5.22829	129.487	1.64791e-25	3.66349e-24	FBgn0039084	CG10175
RS013318	-0.0808425	0.058449	-0.0486924	-0.276611	-0.360287	-0.159415	8.10579	129.448	1.68009e-25	3.7297e-24	FBgn0034410	Topors
RS008874	-0.806873	0.00842608	-0.0409507	-0.0659057	-0.157302	0.0393334	11.5568	129.12	1.96916e-25	4.36521e-24	FBgn0002773	Mlc2
RS009348	8.21274	-0.991772	7.771	8.00931	7.29843	-1.16251	3.61453	129.113	1.9761e-25	4.37437e-24	FBgn0032144	CG17633
RS013233	7.20172	0.017891	4.66712	4.44517	4.0354	-1.37007	0.683991	129.054	2.03308e-25	4.49412e-24	FBgn0024997	CG2681
RS009773	-1.82906	0.0297205	-0.12656	0.431791	0.139804	0.459147	2.89323	128.724	2.38566e-25	5.26602e-24	FBgn0037057	CG10512
RS005869	-1.3918	-0.296872	0.174492	-0.0293023	-0.0422366	0.682332	4.09925	128.659	2.46233e-25	5.42757e-24	NA	NA
RS008956	0.795315	0.0252397	-0.0390564	0.0956222	0.0947416	-0.0971616	8.1143	128.597	2.53684e-25	5.58393e-24	FBgn0028697	RpL15
RS000466	-1.37235	-0.239533	0.381593	0.408653	0.315089	0.385079	3.70778	128.566	2.57563e-25	5.6613e-24	FBgn0015032	Cyp4c3
RS008456	-0.907617	-0.321066	0.215532	0.0590435	-0.0763899	0.381482	6.76315	128.548	2.5989e-25	5.70441e-24	NA	NA
RS015505	-0.573137	-0.0598104	-0.262892	-0.3395	-0.451836	0.0281434	7.39735	128.532	2.61837e-25	5.73905e-24	FBgn0023537	CG17896
RS007283	-0.743901	0.031314	-0.170682	-0.108846	-0.268413	-0.199863	8.63848	128.528	2.62421e-25	5.74377e-24	FBgn0026403	Ndg
RS002511	-0.543857	0.00358974	0.103474	0.165857	0.132912	0.00733623	6.81477	128.449	2.72549e-25	5.95709e-24	FBgn0038293	CG6904
RS011903	1.30426	0.0797614	-0.153259	-0.189646	-0.0563748	-0.0895532	6.32799	128.285	2.95101e-25	6.44098e-24	FBgn0003189	r
RS006405	-1.08634	-0.187427	0.441652	0.424805	0.57989	0.024969	3.83411	128.151	3.14958e-25	6.86477e-24	FBgn0034517	Cpr57A
RS008889	9.50123	2.73645	8.61288	8.69238	7.31868	-4.28009	2.49266	128.111	3.21183e-25	6.99065e-24	FBgn0036316	CG10960
RS003745	-0.76948	-0.336006	0.0135815	-0.071828	0.0299276	0.242756	6.61198	128.046	3.31364e-25	7.20219e-24	FBgn0000721	for
RS008907	-1.03712	0.232139	0.635081	0.52109	0.365877	0.0433426	4.27397	128.03	3.34019e-25	7.24979e-24	FBgn0050361	mtt
RS001358	10.6099	0.0539975	9.87055	9.26129	8.86606	-1.47082	3.66141	128.018	3.35994e-25	7.28252e-24	FBgn0030509	CG11162
RS013591	6.53835	0.126071	5.88884	4.15587	5.41061	-1.55534	0.15545	127.981	3.42016e-25	7.40274e-24	FBgn0003410	sina
RS003831	1.95462	-0.86681	1.32339	-0.779495	-0.726918	0.422288	4.17506	127.974	3.43141e-25	7.41679e-24	FBgn0051098	CG31098
RS000012	1.21641	-0.426287	-0.183165	-0.299978	-0.0817203	0.176871	4.90335	127.957	3.46034e-25	7.46898e-24	FBgn0032726	CG10621
RS003919	-0.606848	0.0171297	0.0850253	0.136142	0.0311566	0.0698724	6.45184	127.838	3.66481e-25	7.89935e-24	FBgn0259171	Pde9
RS007346	-0.630693	0.0729006	0.167641	0.142377	0.0959629	-0.0129437	10.8481	127.819	3.69918e-25	7.96244e-24	FBgn0003721	Tm1
RS000919	0.624574	-0.237302	-0.160159	-0.307211	-0.251148	0.268399	6.66154	127.744	3.83721e-25	8.24814e-24	FBgn0263782	Hmgcr
RS015114	-1.08519	0.0331426	0.195521	0.63248	0.677067	-0.053186	3.72467	127.355	4.63153e-25	9.94183e-24	FBgn0053548	msta
RS007007	0.915234	0.147808	0.393585	0.00595095	0.0298186	0.0760425	7.40508	127.265	4.83897e-25	1.03728e-23	FBgn0027073	CG4302
RS009030	9.17526	-1.79946	10.0299	9.95619	8.5079	-0.0718339	3.82299	127.148	5.12154e-25	1.09635e-23	FBgn0031538	CG3246
RS014649	7.0162	0.0154304	6.16207	5.93887	5.83439	-1.2018	0.586361	127.026	5.43178e-25	1.16116e-23	FBgn0038676	CG6026
RS010652	0.974975	-0.0218922	-0.236415	-0.216235	0.0882277	-0.129264	5.96376	126.885	5.81752e-25	1.24192e-23	FBgn0262707	CTPsyn
RS014541	8.53259	2.43968	7.97956	6.60735	6.91546	-3.882	1.77279	126.852	5.91155e-25	1.26027e-23	FBgn0035888	CG7120
RS004562	4.89517	-1.69079	-0.733767	-2.30065	0.744585	0.899588	0.447108	126.785	6.10544e-25	1.29982e-23	FBgn0250833	CG34461
RS015408	-0.665476	-0.00305316	-0.0479329	-0.0805979	-0.158598	0.0597735	7.55094	126.766	6.16274e-25	1.31023e-23	FBgn0032946	nrv3
RS010590	-0.645811	-0.109493	-0.292053	0.0732992	0.0117705	0.0380697	7.44675	126.054	8.70187e-25	1.84755e-23	FBgn0039184	CG6432
RS006550	-0.375627	-0.0116351	0.436298	0.4119	0.294254	0.0611514	7.56429	125.964	9.08763e-25	1.92682e-23	FBgn0032156	CG13124
RS006886	6.12912	0.576192	4.11051	4.08451	4.13349	-2.50688	1.20987	125.922	9.27412e-25	1.96212e-23	FBgn0003117	pnr
RS006368	0.517368	0.0242465	-0.189998	-0.122654	-0.0739288	-0.138373	7.19897	125.921	9.27928e-25	1.96212e-23	FBgn0025582	Int6
RS007893	2.78637	-1.26908	1.34156	0.356654	1.70584	1.59964	1.0433	125.821	9.74185e-25	2.05714e-23	FBgn0037895	CG6723
RS010237	-0.751191	-0.0688788	0.0685683	0.0743263	0.0470938	0.0880365	6.19486	125.787	9.90005e-25	2.08772e-23	FBgn0016126	CaMKI
RS004657	0.825118	-0.180533	-0.0896182	-0.806754	-0.370961	0.389475	10.8888	125.76	1.00336e-24	2.11301e-23	NA	NA
RS010485	1.39242	-0.0073774	-0.104885	-0.538923	-0.443752	-0.310107	4.3108	125.746	1.00989e-24	2.1239e-23	FBgn0031097	obst-A
RS004256	-0.630334	-0.0947485	0.153862	0.0486017	0.0738542	0.161679	6.75144	125.299	1.25433e-24	2.63443e-23	FBgn0262742	Fas1
RS007529	0.484804	-0.0183019	-0.0806408	-0.173175	-0.203993	-0.0133293	11.4379	125.274	1.26959e-24	2.66289e-23	FBgn0086558	Ubi-p5E
RS000721	0.487515	-0.0802792	0.110155	0.247259	0.0553437	0.0610088	6.53907	125.158	1.34277e-24	2.81259e-23	NA	NA
RS008334	-1.10846	0.0119497	0.181901	0.257088	0.0698388	0.107957	9.73558	125.133	1.35936e-24	2.84352e-23	FBgn0037537	CG2767
RS003188	-0.818293	-0.230119	0.244908	0.419377	0.35354	0.17377	6.10122	125.094	1.38519e-24	2.89368e-23	NA	NA
RS015312	9.33303	1.57059	8.38235	8.17891	7.27892	-3.40681	2.32645	125.014	1.43997e-24	3.00409e-23	FBgn0034083	lbk
RS008652	-1.08964	-0.348868	1.05108	1.01333	0.948011	0.288095	3.97713	124.731	1.65107e-24	3.43988e-23	NA	NA
RS008201	-1.72692	-0.140365	0.118738	0.373407	0.152817	0.606553	10.2179	124.599	1.76037e-24	3.6627e-23	NA	NA
RS003151	-0.705078	0.0807107	-0.530539	-0.634606	-0.809226	-0.475327	6.4334	124.573	1.78244e-24	3.70368e-23	FBgn0033302	Cyp6a14
RS015499	-1.11886	-0.13733	0.291342	0.358564	0.320646	0.357285	7.02234	124.25	2.08442e-24	4.32538e-23	FBgn0263973	jv
RS013213	-0.496731	0.0949842	0.10143	0.0619364	-0.0818587	-0.0297349	7.5117	123.828	2.55621e-24	5.29733e-23	FBgn0039737	CG7920
RS010084	0.473236	-0.291166	0.0715384	-0.0326752	-0.085294	0.157484	10.1868	123.785	2.61053e-24	5.40273e-23	FBgn0001233	Hsp83
RS001421	-1.02118	-0.174677	-0.141252	0.0610585	-0.0265684	0.081521	4.69051	123.56	2.91117e-24	6.01694e-23	FBgn0031703	CG12512
RS003532	0.606707	-0.0512316	-0.161852	-0.110511	-0.126877	0.0117187	5.84745	123.489	3.01211e-24	6.21732e-23	FBgn0027093	Aats-arg
RS008459	-0.86032	0.0815692	0.0808157	0.106898	0.0446582	0.112546	6.06518	123.485	3.01879e-24	6.22286e-23	NA	NA
RS003365	0.792409	-0.0891125	-0.148221	-0.139148	-0.226208	0.0776389	6.62347	123.425	3.10682e-24	6.39586e-23	FBgn0032713	CG17323
RS013198	1.213	-0.129005	-0.104135	-0.125965	-0.262698	0.1594	6.69076	123.417	3.11909e-24	6.41265e-23	FBgn0030485	CG1998
RS006740	-0.735842	0.0961875	0.16884	0.1372	0.149784	0.0523427	6.12237	123.373	3.1865e-24	6.54262e-23	FBgn0024963	GluClalpha
RS012123	4.28599	-0.828935	4.34284	3.36786	3.70381	-0.803024	0.363835	123.333	3.24924e-24	6.65593e-23	NA	NA
RS008204	11.285	2.03131	7.59949	7.04003	6.18862	-3.50359	4.38393	123.33	3.25322e-24	6.65593e-23	FBgn0259230	lectin-22C
RS000531	-0.617104	0.0633469	-0.179617	-0.267379	-0.119811	-0.307395	5.28952	123.329	3.2545e-24	6.65593e-23	FBgn0250869	CG42240
RS001624	1.5395	-1.33202	2.04846	1.65026	-0.317478	1.5861	1.2592	123.288	3.32091e-24	6.78284e-23	NA	NA
RS008817	-1.14835	-0.109236	0.145041	-0.237651	-0.213505	0.465648	8.60641	123.242	3.3955e-24	6.92612e-23	FBgn0031703	CG12512
RS002142	10.1	1.53139	8.95964	9.09745	7.9612	-3.51474	2.99699	123.138	3.57075e-24	7.27406e-23	FBgn0024361	Tsp2A
RS004625	-0.888635	0.312807	1.6565	0.460936	0.13938	0.0818882	4.77486	122.932	3.94501e-24	8.02599e-23	FBgn0034837	RpL22-like
RS000519	-0.461395	-0.123477	0.0903708	0.0669653	-0.0268748	0.154875	8.89341	122.884	4.0384e-24	8.20527e-23	FBgn0000108	Appl
RS000573	-0.970789	-0.109236	0.0357637	0.0342077	-0.114346	0.14405	5.77522	122.648	4.52601e-24	9.18404e-23	FBgn0036713	Mip
RS002756	-0.527083	-0.0250783	0.145475	0.0870529	0.0557266	0.128619	8.46454	122.562	4.71823e-24	9.56162e-23	FBgn0034155	unc-104
RS008605	-1.2384	0.151604	-0.36982	0.0348205	-0.0771982	-0.0359993	8.0037	122.376	5.16167e-24	1.04467e-22	FBgn0034709	Swim
RS006883	-0.931722	0.0958996	-0.567233	-0.505174	-0.650932	-0.523381	4.02197	122.2	5.62288e-24	1.13654e-22	NA	NA
RS004226	0.648598	-0.0130686	-0.105962	-0.084813	-0.0285659	-0.122005	8.32893	122.17	5.70341e-24	1.15132e-22	FBgn0038826	CG17838
RS006994	-1.38826	0.045761	-0.250486	-0.264396	-0.46911	0.346194	5.49047	121.989	6.22724e-24	1.25544e-22	FBgn0034394	CG15096
RS000456	-1.07225	-0.0267527	0.258756	0.115279	0.0291674	-0.0692052	4.39656	121.901	6.49604e-24	1.30794e-22	NA	NA
RS010420	-1.17142	-0.26846	0.182063	-0.240346	-0.233958	0.452949	7.07837	121.785	6.87138e-24	1.38172e-22	NA	NA
RS006625	9.0094	1.66899	7.45602	7.3025	6.50887	-3.86927	3.9825	121.587	7.56124e-24	1.51848e-22	FBgn0001311	kkv
RS001232	-0.868386	0.0432942	-0.108017	-0.137481	-0.192025	-0.175242	7.1506	121.421	8.19355e-24	1.64335e-22	FBgn0040342	CG3706
RS004640	-0.737347	0.108243	-0.0957847	-0.257828	-0.209816	-0.158452	4.86773	121.377	8.37335e-24	1.67725e-22	FBgn0038156	CG14372
RS006060	1.49125	-0.19165	0.98453	0.537057	0.460793	-0.044387	4.01075	121.177	9.22255e-24	1.84498e-22	FBgn0262111	f
RS006511	0.736067	-0.0857661	-0.253323	0.00909677	-0.0118704	-0.103003	5.55789	121.113	9.51435e-24	1.90092e-22	FBgn0036516	CG7656
RS014185	7.92605	1.20723	6.40832	5.78053	5.54726	-2.39709	3.21109	120.926	1.0415e-23	2.0782e-22	FBgn0038098	CG7381
RS005498	-0.83511	0.0495528	-0.123948	0.263234	0.0916901	0.12718	6.48962	120.846	1.08239e-23	2.15704e-22	FBgn0032955	CG2201
RS000170	-0.49171	-0.079068	0.212989	0.211801	0.153079	0.213774	7.11046	120.814	1.09912e-23	2.18757e-22	FBgn0261570	CG42684
RS003638	-0.559816	-0.0379796	-0.176549	-0.173267	-0.398613	-0.111016	7.808	120.709	1.15645e-23	2.29875e-22	FBgn0031515	CG9664
RS004783	0.487422	-0.0649072	0.269399	0.104349	0.0960115	0.23986	8.80291	120.591	1.22431e-23	2.43052e-22	FBgn0259677	CG42346
RS000651	-0.933614	0.106137	0.120394	0.071515	0.0916626	0.0750608	11.8523	120.536	1.25729e-23	2.49282e-22	FBgn0261836	Msp-300
RS008433	0.809832	-0.0612866	-0.357039	-0.449578	-0.452295	-0.121837	6.52212	120.454	1.30802e-23	2.59011e-22	NA	NA
RS008042	0.571149	-0.111407	0.0379956	0.013918	0.00746717	-0.00674546	6.8365	120.425	1.32704e-23	2.62443e-22	FBgn0027081	Aats-thr
RS012024	2.30102	-0.0013077	-0.501381	-0.89376	-0.395536	-0.397399	4.86825	120.415	1.33304e-23	2.63297e-22	FBgn0039155	Kal1
RS004890	-1.59241	-0.305209	-0.213864	0.36156	0.0820219	0.636577	4.16796	120.406	1.33912e-23	2.64162e-22	FBgn0038873	CG5892
RS003685	-0.602518	0.167333	0.330459	0.412364	0.570038	-0.0134447	6.75254	120.291	1.41562e-23	2.78901e-22	FBgn0037726	CG9492
RS007183	-1.27819	-0.0271134	0.279029	0.0654678	0.0458323	0.264473	4.3528	120.215	1.46862e-23	2.88976e-22	FBgn0036203	Muc68D
RS014705	-0.560839	-0.0140079	0.0145683	0.00390327	0.0601654	0.112166	7.26173	120.176	1.49636e-23	2.94063e-22	FBgn0004369	Ptp99A
RS014895	-1.23652	-0.12231	0.764184	0.256662	0.358393	0.242472	7.52379	120.149	1.51656e-23	2.97659e-22	FBgn0011281	Pbprp3
RS002820	6.57057	1.57191	3.87737	3.97392	3.69236	-2.82747	0.311502	120.124	1.5347e-23	3.00839e-22	FBgn0013770	Cp1
RS013771	-1.4158	0.0187494	0.454293	-0.416978	-0.106558	-0.0236182	10.7481	119.926	1.68898e-23	3.30666e-22	FBgn0034067	CG8399
RS000820	1.69889	-0.0118457	-0.613768	-0.719499	-0.160197	-0.29332	4.93285	119.905	1.70649e-23	3.33676e-22	FBgn0052354	CG32354
RS001859	6.92367	-2.12957	7.13268	6.26598	6.2707	0.71224	5.78877	119.646	1.93347e-23	3.77584e-22	NA	NA
RS013466	-0.548175	0.148084	0.143957	0.338385	0.242082	-0.0649299	6.09991	119.547	2.02824e-23	3.95595e-22	FBgn0085386	CG34357
RS015400	-1.63698	-0.247242	0.47034	0.0150748	-0.307705	0.884233	3.15716	119.428	2.14936e-23	4.1831e-22	FBgn0034145	CG5065
RS014379	-0.588118	0.0246878	0.0406303	0.00318656	-0.00116645	0.0145208	7.74477	119.427	2.15007e-23	4.1831e-22	FBgn0031538	CG3246
RS011728	0.660426	-0.0958762	0.555352	0.950445	0.637329	0.132023	4.79129	119.406	2.17166e-23	4.21985e-22	NA	NA
RS004338	1.09824	0.0853412	0.327156	0.060774	0.212457	0.285022	6.2498	119.113	2.50242e-23	4.8565e-22	FBgn0040507	ACXD
RS015298	6.59381	1.70953	3.30994	2.05542	1.92798	-4.21538	0.12104	119.069	2.55659e-23	4.95545e-22	FBgn0037553	CG18249
RS006268	8.83187	-1.61137	7.87671	7.61386	6.32573	-0.575941	3.22718	118.813	2.89275e-23	5.60008e-22	FBgn0029826	CG6041
RS013237	-0.664021	0.00441133	0.408041	0.522054	0.545494	0.0981249	6.20262	118.725	3.01845e-23	5.83617e-22	FBgn0263077	CG43340
RS010060	4.59066	1.64647	-1.43978	-1.58602	0.0686938	-1.80624	2.40986	118.624	3.16931e-23	6.12027e-22	FBgn0036678	CG11905
RS014046	-1.04445	0.0545318	0.17909	-0.0178983	0.122525	0.135609	4.40882	118.562	3.26663e-23	6.30039e-22	FBgn0038412	Zip3
RS008844	6.35396	0.0892775	5.15299	3.59276	5.45433	-2.32223	-0.0421353	118.216	3.86106e-23	7.43768e-22	FBgn0028518	CG18480
RS006355	0.967267	0.12883	-0.153709	-0.189707	-0.0771402	-0.0997342	4.63717	118.073	4.13639e-23	7.95822e-22	FBgn0037898	CG18643
RS004384	-0.63707	-0.0582787	-0.0597425	0.221963	0.366166	0.216816	6.46792	117.986	4.31425e-23	8.29016e-22	FBgn0036979	CG13247
RS012124	4.28052	0.267906	3.57624	2.91734	2.93453	-1.65692	1.48372	117.812	4.69411e-23	9.009e-22	FBgn0035583	CG13704
RS001251	-0.929065	-0.181197	0.0646143	0.332266	-0.144783	-0.176321	4.93735	117.731	4.88111e-23	9.35636e-22	FBgn0033382	Hydr1
RS008117	-0.581311	-0.0211078	0.219855	0.323684	0.0119728	-0.0285897	5.75019	117.71	4.93072e-23	9.43984e-22	FBgn0031360	CG31937
RS004860	0.575314	-0.187979	0.0813734	-0.00539687	0.107921	0.103666	5.78233	117.664	5.04078e-23	9.63871e-22	FBgn0033005	CG3107
RS003513	-1.1462	-0.12781	-0.0586653	0.32438	-0.292971	0.0750237	4.68245	117.495	5.4708e-23	1.04482e-21	FBgn0038610	CG7675
RS007649	0.56592	0.0744629	0.181526	0.224567	0.215428	-0.0116483	7.32243	117.34	5.89701e-23	1.12483e-21	FBgn0023023	CRMP
RS006513	0.683481	0.10797	-0.628258	-0.672797	-0.648291	-0.112796	6.28819	117.252	6.15062e-23	1.17178e-21	NA	NA
RS003052	-0.490948	-0.206919	0.120024	0.366902	1.12225	0.284402	4.33493	116.967	7.06157e-23	1.34368e-21	NA	NA
RS002851	-0.805733	0.098015	0.174302	0.153157	0.0692845	0.0913785	8.09981	116.921	7.21992e-23	1.37214e-21	FBgn0020503	CLIP-190
RS009446	4.72308	-1.61843	5.96762	4.46414	5.40788	0.550151	0.170499	116.822	7.57452e-23	1.43777e-21	FBgn0003410	sina
RS015120	-1.08132	-0.0750266	-0.504851	-0.268061	-0.442691	0.345023	4.38927	116.647	8.23927e-23	1.56205e-21	NA	NA
RS007471	0.615592	0.0038784	0.0751246	-0.0578477	-0.126823	0.0439072	8.24289	116.528	8.72882e-23	1.65286e-21	FBgn0030737	CG9914
RS014290	-0.308898	0.0550832	-0.78022	0.166472	-0.114323	-0.0487988	7.29207	116.471	8.97055e-23	1.69657e-21	FBgn0033753	Cyp301a1
RS009005	-0.485636	0.0238256	0.131711	0.0809878	0.127504	0.151796	7.16901	116.447	9.07865e-23	1.71493e-21	FBgn0063368	Gpb5
RS009615	-0.986499	-0.231654	0.23103	0.0200152	-0.26321	0.372979	8.03325	116.343	9.54316e-23	1.80049e-21	NA	NA
RS013455	0.728373	0.0624507	-0.0842419	0.0274491	0.0586307	0.0413993	7.0764	116.151	1.04746e-22	1.97384e-21	FBgn0030616	RpL37a
RS008158	-1.64591	-0.0715379	0.390906	0.273279	0.340184	0.610144	6.05849	116.14	1.05294e-22	1.98177e-21	FBgn0040259	Ugt86Da
RS008666	0.614894	-0.133494	-0.0136643	-0.142926	0.0798006	0.269722	6.68259	116.127	1.05928e-22	1.99129e-21	FBgn0259938	cwo
RS000206	0.946689	-0.12128	0.0220261	-0.249446	-0.0296323	-0.120367	5.82782	115.986	1.13399e-22	2.12917e-21	FBgn0250871	pot
RS004713	8.73648	-0.0420763	7.79387	7.54396	6.6975	-1.34426	3.46163	115.957	1.15002e-22	2.15666e-21	FBgn0039084	CG10175
RS010001	-0.583783	0.12064	-0.148391	-0.047872	-0.188125	-0.0554622	7.26851	115.921	1.17049e-22	2.19242e-21	NA	NA
RS008166	7.39014	1.63276	6.58629	5.8027	5.64173	-3.46367	0.764015	115.83	1.22278e-22	2.2876e-21	NA	NA
RS003031	7.90113	0.0347207	6.64581	6.50441	5.96691	-1.54076	2.96572	115.597	1.36828e-22	2.55675e-21	NA	NA
RS015369	-1.38516	-0.011217	-1.87498	-0.764436	-1.85276	0.258343	4.14185	115.455	1.46557e-22	2.73526e-21	NA	NA
RS011453	-1.21839	-0.0252945	-0.0243375	-0.185004	-0.202398	0.326061	6.01245	115.209	1.6503e-22	3.07634e-21	FBgn0032021	CG7781
RS011608	7.42008	0.0478627	6.67296	6.1575	5.74462	-1.49819	0.82405	115.198	1.65939e-22	3.08959e-21	FBgn0028833	Dak1
RS010300	-0.496621	-0.0167121	0.150541	0.391721	0.562372	0.0372741	6.06354	115.189	1.667e-22	3.10006e-21	FBgn0263219	Dscam4
RS012752	0.917037	0.113002	-0.374051	-0.452503	-0.252072	-0.236158	7.94534	115.118	1.72489e-22	3.2039e-21	FBgn0035772	Sh3beta
RS009998	1.88453	0.061689	0.268252	0.291405	0.513746	0.0238619	5.44754	114.986	1.8386e-22	3.41104e-21	FBgn0003965	v
RS014107	-1.13241	0.0972676	-0.520442	-0.67241	-0.783805	0.349459	12.145	114.947	1.87362e-22	3.47188e-21	FBgn0024555	flfl
RS002819	6.03161	0.187827	4.63168	3.99086	3.6779	-1.34772	2.75901	114.801	2.0103e-22	3.72072e-21	FBgn0013770	Cp1
RS005934	5.59287	0.549077	4.20175	3.82771	2.50813	-2.67035	3.00253	114.135	2.77286e-22	5.12601e-21	FBgn0025866	CalpB
RS014113	4.68704	-1.60759	5.6363	3.68431	5.37277	-0.133589	0.0430216	114.124	2.7872e-22	5.14642e-21	NA	NA
RS003026	1.06939	0.0987682	-0.139252	-0.0756334	-0.0835989	-0.17297	5.31307	114.046	2.89455e-22	5.3383e-21	FBgn0005612	Sox14
RS005001	-0.354533	-0.0864188	0.757043	0.783823	0.587075	-0.0188253	6.98844	114.041	2.90162e-22	5.34502e-21	FBgn0001986	l(2)35Df
RS006611	0.638041	0.0323491	-0.0442738	0.0296122	0.0851202	-0.0399568	8.46602	113.931	3.05884e-22	5.62799e-21	FBgn0086472	RpS25
RS001122	-0.593236	-0.00928658	0.0567251	-0.100007	-0.157736	0.128588	6.35677	113.925	3.06797e-22	5.63812e-21	FBgn0033302	Cyp6a14
RS014431	1.23857	0.0739053	0.714378	0.59792	0.421148	0.117432	5.41519	113.74	3.3553e-22	6.15889e-21	FBgn0051145	CG31145
RS014869	-1.11079	0.0962689	0.162331	0.111371	-0.0804539	0.252486	9.05685	113.735	3.36281e-22	6.16541e-21	FBgn0051414	CG31414
RS014106	-1.22816	0.216473	-0.271732	-0.802247	-0.950655	0.204801	7.553	113.709	3.40566e-22	6.23664e-21	NA	NA
RS012391	0.341314	-0.0742561	-0.220077	-0.164563	-0.206443	0.107865	7.5823	113.635	3.52911e-22	6.45513e-21	FBgn0029818	CG3033
RS007857	0.461472	0.0620653	-0.315585	-0.269313	-0.380646	0.146271	7.94323	113.586	3.6133e-22	6.60137e-21	FBgn0003308	ry
RS001196	-2.17097	-0.376655	0.345491	0.168584	-0.126928	0.483426	5.71343	113.562	3.65585e-22	6.67128e-21	NA	NA
RS005329	-0.541614	0.0889351	0.497738	0.441163	0.462304	0.0753684	5.63032	113.404	3.94575e-22	7.19189e-21	FBgn0260793	2mit
RS010021	0.554095	0.0430108	0.00292278	-0.141751	-0.0975401	-0.137819	7.34717	113.359	4.03173e-22	7.34e-21	FBgn0030344	CG2025
RS012955	-0.554657	0.0117951	-0.0086206	-0.0111842	-0.103029	-0.0344721	8.38602	113.316	4.11612e-22	7.4849e-21	FBgn0005633	fln
RS008825	-0.746538	0.00960565	0.867165	0.406068	0.262253	0.240936	5.7172	113.251	4.24838e-22	7.7164e-21	FBgn0013988	Strn-Mlck
RS000043	1.24394	0.177613	0.48832	0.44176	0.500558	-0.0637059	4.57113	113.148	4.46521e-22	8.1008e-21	NA	NA
RS002509	0.574573	0.0165781	-0.0707531	-0.0729984	0.0252026	-0.0872631	6.79737	113.107	4.55468e-22	8.2535e-21	FBgn0010247	Parp
RS005235	1.32121	-0.0179261	0.38436	0.054852	0.212874	-0.205129	8.24215	113.078	4.61842e-22	8.35929e-21	FBgn0027341	Gfat1
RS004339	0.686761	-0.0388529	-0.0792978	-0.157723	-0.095091	0.0285571	6.21636	112.791	5.30297e-22	9.58718e-21	FBgn0042178	CG32165
RS005194	-0.78024	0.177776	-0.254051	-0.202688	-0.424838	-0.238655	4.48129	112.755	5.39675e-22	9.74542e-21	FBgn0038460	CG18622
RS008863	0.307953	0.00723942	0.042186	0.079092	0.0679034	-0.0340815	9.19736	112.691	5.56702e-22	1.00413e-20	FBgn0023213	eIF4G
RS014263	3.8074	0.340877	3.93908	3.8984	3.52127	-1.98948	1.67254	112.649	5.68077e-22	1.02346e-20	NA	NA
RS008098	-1.87337	-0.0964002	0.429102	0.124707	-0.0616095	0.070233	4.73965	112.603	5.80812e-22	1.04519e-20	FBgn0051974	CG31974
RS005518	-0.368481	-0.0345799	-0.168129	-0.141794	-0.177281	0.0110057	12.3252	112.553	5.94867e-22	1.06925e-20	FBgn0000559	Ef2b
RS010994	-0.694831	-0.00682393	0.218189	0.0589634	0.0250722	-0.043102	5.47664	112.433	6.30297e-22	1.13163e-20	FBgn0035756	unc-13-4A
RS006696	0.580731	-0.0533004	0.33348	0.458204	0.381902	0.067121	6.26443	112.317	6.6676e-22	1.19572e-20	FBgn0039667	CG2010
RS001373	-3.19526	0.252745	0.676357	0.364387	0.493674	-2.02828	0.76837	112.199	7.0578e-22	1.26424e-20	FBgn0034045	CG8249
RS014324	1.3862	0.23318	-0.0501244	0.0499845	0.049164	-0.293185	3.51686	112.017	7.70381e-22	1.37837e-20	FBgn0000384	cta
RS007451	-0.59356	0.0274201	0.253794	0.266962	0.355421	0.0880035	8.90272	111.862	8.30577e-22	1.48437e-20	FBgn0039897	CG1674
RS013248	-0.0641727	0.0543859	-0.662832	-0.047334	-0.253676	-0.0225288	8.01258	111.724	8.87616e-22	1.58449e-20	FBgn0035575	CG7509
RS008286	1.42519	0.310645	-0.24743	-0.100698	0.0531234	-0.557894	3.63432	111.594	9.45006e-22	1.68501e-20	FBgn0029114	Tollo
RS013365	-0.80208	0.0230638	-0.23804	-0.0961326	-0.118979	-0.0878691	7.44008	111.432	1.02186e-21	1.81996e-20	FBgn0000565	Eip71CD
RS004088	3.91414	0.833987	2.38907	1.58898	1.78807	-2.07726	1.4413	111.384	1.04598e-21	1.8608e-20	FBgn0034094	Tsf3
RS013031	4.72307	-0.723604	5.46545	4.6306	4.4582	-0.53774	1.26427	111.254	1.11333e-21	1.97834e-20	FBgn0031381	Npc2a
RS002259	-0.931294	-0.138045	0.0990547	-0.112851	-0.165116	0.171859	5.78756	111.215	1.13474e-21	2.0141e-20	FBgn0085638	CG41378
RS007194	0.805769	-0.0295004	0.0798003	-0.0712994	-0.0321791	0.153668	7.23427	111.19	1.14829e-21	2.03583e-20	FBgn0001186	Hex-A
RS002911	-1.18078	-0.310625	0.351294	0.350137	0.41869	0.645998	4.48805	111.156	1.16724e-21	2.06707e-20	FBgn0015040	Cyp9c1
RS005259	-0.96613	-0.0294265	0.340106	0.382917	0.178963	-0.0577421	6.95264	111.096	1.2016e-21	2.12551e-20	FBgn0030608	Lsd-2
RS000189	-0.575315	-0.0277656	0.131835	0.0552183	0.0808647	0.191469	7.15513	110.96	1.28295e-21	2.26684e-20	FBgn0264294	Cyt-b5
RS004712	6.23119	0.124805	5.35686	3.21335	5.33803	-1.8448	-0.0956284	110.861	1.34584e-21	2.37526e-20	FBgn0027584	CG4757
RS010034	-0.481925	0.0504638	0.0696626	0.0863606	0.22323	0.0489805	8.95162	110.812	1.37794e-21	2.42916e-20	FBgn0262508	CG43078
RS001148	-0.680926	0.176878	0.143275	0.16929	0.223985	-0.023779	5.64987	110.789	1.39357e-21	2.45394e-20	FBgn0002525	Lam
RS010719	-0.432914	-0.0714249	0.141423	0.219614	0.0818522	0.174447	8.04989	110.136	1.90921e-21	3.35815e-20	FBgn0263289	scrib
RS011783	2.54461	-0.161868	1.42704	1.07037	1.30426	0.274603	3.3978	109.819	2.22431e-21	3.90796e-20	FBgn0039311	CG10513
RS011242	-1.13068	-0.20158	0.163382	-0.0788912	-0.207763	0.39682	5.96146	109.779	2.26727e-21	3.97896e-20	NA	NA
RS007665	-0.383973	-0.0587156	0.228052	0.155285	0.180234	0.111124	8.70729	109.659	2.40283e-21	4.21212e-20	FBgn0259214	PMCA
RS005266	-0.896804	-0.272102	0.109253	-0.208537	-0.000766477	0.263168	5.7093	109.286	2.87531e-21	5.0347e-20	FBgn0033058	CCHa2r
RS006887	-0.961672	-0.111532	0.544069	0.525111	0.459407	0.130402	4.85292	109.217	2.97333e-21	5.20049e-20	FBgn0003507	srp
RS009553	0.629929	-0.154351	0.145046	-0.0234129	-0.0915816	0.202316	7.33941	109.138	3.08932e-21	5.39731e-20	FBgn0036875	CG9449
RS000540	0.73473	0.17556	-0.207197	-0.0566336	-0.023298	-0.20624	5.50405	109.129	3.1015e-21	5.41251e-20	FBgn0034243	ns2
RS010790	-0.446395	-0.0554091	0.0634244	0.0767688	0.00151028	-0.0341439	7.0155	109.109	3.13266e-21	5.46077e-20	FBgn0032192	CG5731
RS013581	0.744766	0.0690138	-0.0491646	0.0721741	-0.133565	-0.0687498	5.30798	109.049	3.22411e-21	5.61391e-20	FBgn0034351	CG5190
RS009866	0.662608	0.0375547	-0.0403629	0.0398107	0.130966	-0.0392519	7.03326	109.029	3.25554e-21	5.66232e-20	FBgn0030504	CG2691
RS010041	-1.36083	-0.0835808	-0.10263	-0.2739	-0.382157	0.288466	5.44011	109.004	3.29397e-21	5.72277e-20	FBgn0030695	PGRP-LE
RS004856	0.760371	-0.0415156	0.122517	0.0847356	0.156536	-0.156271	5.92815	108.916	3.43716e-21	5.96489e-20	FBgn0002069	Aats-asp
RS008024	-0.375275	-0.0571398	0.0896241	0.952975	-0.192406	0.0729761	7.38597	108.891	3.47903e-21	6.03083e-20	NA	NA
RS004289	0.355871	0.0447362	-0.0317676	-0.123212	-0.213156	0.358094	9.09464	108.859	3.5328e-21	6.11723e-20	FBgn0004577	Pxd
RS011787	-0.704894	0.150099	-0.0293801	-0.460835	-0.268593	-0.637075	4.27582	108.598	4.00648e-21	6.92974e-20	FBgn0028878	CG15269
RS006686	-0.381297	0.0417317	-0.297773	-0.339812	-0.102373	-0.0580598	10.5877	108.47	4.26178e-21	7.36314e-20	FBgn0037874	Tctp
RS008244	1.08336	0.130936	0.0844946	0.511262	0.414989	0.167338	5.32515	108.467	4.26754e-21	7.36494e-20	FBgn0030603	CG5541
RS011394	-0.737314	0.105892	-0.233329	-0.476298	-0.258904	-0.333399	4.56694	108.449	4.30516e-21	7.42164e-20	FBgn0028479	Mtpalpha
RS008720	4.28793	-1.36346	5.06809	4.24708	4.17859	0.180898	0.880284	108.445	4.31419e-21	7.42899e-20	FBgn0000615	exu
RS011374	0.54873	0.0434891	-0.165643	-0.0901285	-0.106529	-0.147993	7.98094	108.249	4.74061e-21	8.15427e-20	FBgn0035162	CG13900
RS007561	0.673557	-0.0794872	-0.208137	-0.0873173	-0.287405	-0.00338721	5.98787	108.201	4.85194e-21	8.33657e-20	FBgn0027087	Aats-his
RS013194	-1.62509	0.207751	0.224271	0.0110098	-0.271832	-0.329139	2.26952	108.089	5.12037e-21	8.78809e-20	FBgn0030707	CG8916
RS012194	-0.555481	-0.0230773	0.148753	0.108703	0.0813735	0.0708202	7.77921	107.998	5.349e-21	9.17039e-20	FBgn0014141	cher
RS003124	-0.606352	-0.133253	0.125156	0.0870023	0.091779	0.176443	6.81643	107.89	5.63689e-21	9.65333e-20	FBgn0261673	nemy
RS003233	0.0640355	0.0196761	0.463777	-0.0272479	-0.110128	-0.0176438	6.67957	107.572	6.56967e-21	1.12384e-19	FBgn0026761	Trap1
RS014140	0.659063	0.000907622	-0.247536	-0.433948	-0.255441	-0.165889	5.93412	107.496	6.81269e-21	1.16413e-19	FBgn0034657	LBR
RS002555	-0.589846	0.0561043	0.330317	0.292113	0.27989	0.0664128	9.40338	107.487	6.84236e-21	1.16792e-19	FBgn0261788	Ank2
RS008973	0.7081	-0.0266281	-0.628995	-0.7031	-0.511219	0.040914	6.22512	107.453	6.95584e-21	1.18599e-19	FBgn0000299	Cg25C
RS005165	-0.249072	-0.150302	-1.27124	-1.02262	-0.832995	-0.0221953	5.62699	107.446	6.97937e-21	1.18871e-19	FBgn0000464	Lar
RS000713	4.14537	-0.842169	2.90622	2.52979	2.20468	-0.422755	1.28276	107.22	7.78117e-21	1.32382e-19	FBgn0000406	Cyt-b5-r
RS007944	6.22696	0.125285	5.55019	4.13142	4.48606	-2.01644	-0.0957595	106.996	8.6698e-21	1.47339e-19	FBgn0035575	CG7509
RS008554	0.732089	-0.0307753	-0.122564	-0.0657964	-0.0430057	-0.0444566	6.19252	106.913	9.02437e-21	1.53198e-19	FBgn0039175	CG5706
RS004077	-1.64397	-0.0629621	0.0303953	-0.566479	-0.563125	0.463606	12.3658	106.825	9.41545e-21	1.59663e-19	FBgn0022355	Tsf1
RS001705	-1.30519	-0.360258	0.353396	0.646474	0.32064	0.556156	5.22688	106.78	9.6216e-21	1.62982e-19	FBgn0034709	Swim
RS010122	-0.52553	-0.00407862	0.0515129	-0.0159363	-0.0143421	0.0216641	11.5144	106.666	1.01642e-20	1.71986e-19	FBgn0003360	sesB
RS013853	0.529986	-0.200388	0.162015	0.0909236	0.0103179	0.139614	6.12712	106.644	1.02732e-20	1.73641e-19	FBgn0027095	Manf
RS009485	3.20316	0.888843	-1.7444	-2.47895	-0.787444	-1.44385	1.10535	106.46	1.12204e-20	1.89447e-19	FBgn0034462	CG15905
RS001284	-0.425567	0.00800525	0.0738184	0.0607899	0.0392995	-0.00716027	7.26517	106.442	1.13214e-20	1.90944e-19	FBgn0039213	atl
RS002603	4.8863	-0.0598281	3.41316	2.79397	2.13486	-0.968608	3.3573	106.313	1.20472e-20	2.02966e-19	FBgn0051704	CG31704
RS014340	-1.49636	-0.0787911	0.0813409	-0.0268565	0.0167136	0.1118	5.63606	106.181	1.28372e-20	2.16042e-19	FBgn0030638	CG11655
RS010197	-0.949674	-0.289298	0.331946	0.187716	0.105686	0.527893	9.04661	106.068	1.35541e-20	2.27861e-19	FBgn0041181	TepIII
RS006840	-0.694555	-0.120891	0.0775393	-0.0202652	-0.158901	0.200019	6.75316	106.058	1.36225e-20	2.28763e-19	FBgn0017482	T3dh
RS000364	-1.42727	0.320122	-0.482936	-1.23188	-1.17226	-0.0379282	2.55042	106.034	1.37813e-20	2.31182e-19	NA	NA
RS014509	-1.30447	0.0398243	0.114103	0.435394	0.054885	0.284509	4.8464	105.924	1.45301e-20	2.43481e-19	FBgn0036202	CG6024
RS014892	-1.24616	-0.204755	0.494619	0.0827295	0.108312	0.447638	7.26201	105.888	1.47843e-20	2.47475e-19	FBgn0034470	Obp56d
RS003545	1.57481	0.195665	2.45872	2.77374	2.37254	-1.20899	3.99356	105.864	1.4954e-20	2.50046e-19	FBgn0035575	CG7509
RS006917	0.492383	0.0208782	-0.145095	-0.135177	-0.0413379	-0.102589	7.15326	105.557	1.73345e-20	2.8954e-19	FBgn0263396	sqd
RS000192	1.56783	0.348414	-0.127176	-0.310672	0.0219572	-0.413727	3.29887	105.407	1.86304e-20	3.10853e-19	FBgn0028360	l(1)G0148
RS003406	9.51679	1.85765	7.29422	4.78038	6.32522	-3.66867	2.77281	105.306	1.95568e-20	3.25961e-19	FBgn0034092	CG7798
RS000680	-0.0238349	-0.24457	1.46892	0.301565	0.452691	0.265075	3.53471	105.254	2.00602e-20	3.33995e-19	FBgn0039232	CG13636
RS002400	6.96785	0.201043	6.9176	7.05852	5.27257	-2.48512	3.21112	105.12	2.13912e-20	3.55774e-19	FBgn0034539	CG11159
RS009710	-0.382481	-0.119939	0.0623666	0.436702	0.173336	0.206938	9.01649	105.111	2.14873e-20	3.56992e-19	FBgn0003231	ref(2)P
RS014650	2.43077	0.236539	0.422629	1.11335	1.11513	0.372064	1.3013	105.101	2.15871e-20	3.58267e-19	FBgn0029950	CG9657
RS007350	1.77696	0.265319	-0.55901	-0.302047	-0.111998	-0.219019	5.20936	104.891	2.38832e-20	3.95953e-19	FBgn0261788	Ank2
RS004434	2.9713	0.117062	1.29379	0.489396	1.59645	-1.5555	1.06007	104.889	2.39146e-20	3.96052e-19	FBgn0031010	CG8028
RS010841	0.772615	-0.0419336	-0.360171	-0.390518	-0.29271	-0.149507	5.64574	104.665	2.66371e-20	4.40672e-19	FBgn0003068	per
RS009463	0.380466	-0.101043	-0.105469	-0.168191	-0.189198	0.153917	7.11549	104.599	2.74877e-20	4.54261e-19	FBgn0031217	CG11377
RS008827	1.23585	0.120645	-0.346826	-0.459218	-0.21693	-0.0100311	5.09541	104.528	2.84456e-20	4.69593e-19	FBgn0011704	RnrS
RS005095	0.711623	0.0340124	-0.277491	-0.290252	-0.255961	-0.125678	6.21637	104.353	3.09424e-20	5.10271e-19	FBgn0024983	CG4293
RS001523	1.02988	0.122381	0.241755	0.242841	0.266614	-0.0761933	5.7716	104.338	3.11679e-20	5.13447e-19	FBgn0005638	slbo
RS007695	6.16859	0.196163	5.64919	3.16335	4.17909	-2.22687	-0.19044	104.326	3.13539e-20	5.15965e-19	FBgn0264294	Cyt-b5
RS007945	-1.13907	-0.349156	1.1886	1.68758	0.925539	0.560166	4.4575	104.195	3.33908e-20	5.48905e-19	NA	NA
RS009933	-1.02689	0.116152	0.509715	0.345064	0.311744	-0.0458364	7.16195	104.139	3.43009e-20	5.63272e-19	FBgn0035917	Zasp66
RS011601	0.750337	-0.0814915	0.319811	0.164042	0.186293	0.121676	5.74042	103.89	3.86637e-20	6.34248e-19	FBgn0027945	ppl
RS004427	-0.617839	0.140793	-0.245262	-0.0439901	-0.326984	-0.215456	4.96741	103.865	3.91275e-20	6.4118e-19	FBgn0033763	CG8646
RS011702	-0.477919	0.0320867	0.175453	0.205372	0.232957	-0.0365595	8.03507	103.731	4.17401e-20	6.83274e-19	FBgn0026059	Mhcl
RS010309	-1.6236	-0.356479	0.593454	0.0199114	0.108109	0.6361	7.38282	103.563	4.52465e-20	7.39897e-19	NA	NA
RS000491	0.460222	0.3132	5.07519	5.67744	4.17347	-1.02397	1.34643	103.551	4.5516e-20	7.43524e-19	NA	NA
RS007398	-1.41497	-0.18123	0.542599	0.339719	0.365544	0.475534	5.33105	103.456	4.7649e-20	7.77551e-19	FBgn0260004	Snmp1
RS012472	0.406313	-0.0328432	0.222375	0.264639	0.267722	0.0989136	7.37084	103.304	5.12576e-20	8.35564e-19	FBgn0036892	Lon
RS007870	4.79404	1.49512	5.81703	5.07756	5.56903	-2.76707	0.28503	103.077	5.71733e-20	9.31023e-19	NA	NA
RS013535	-2.55209	-0.619836	0.735016	0.195765	0.600078	1.33381	1.74806	102.987	5.96903e-20	9.70995e-19	FBgn0033869	Cpr50Cb
RS008308	-0.578527	-0.0717416	0.0180395	0.0108741	0.0321238	0.218516	7.60969	102.973	6.01038e-20	9.76702e-19	FBgn0035498	Fit1
RS014920	-0.599353	0.15133	-0.277918	-0.223169	-0.38848	-0.00146346	6.36375	102.81	6.50035e-20	1.05522e-18	FBgn0011693	Pdh
RS000465	-1.29023	-0.0335326	0.257088	0.434645	-0.016659	0.190123	3.62693	102.486	7.59739e-20	1.23203e-18	FBgn0010019	Cyp4g1
RS015023	0.98262	0.0695505	-0.173302	-0.139101	0.00850479	-0.18891	4.55082	102.375	8.01343e-20	1.29814e-18	FBgn0033471	CG12134
RS007960	-0.597121	-0.106231	0.191451	0.139989	0.253259	0.155658	7.71634	102.204	8.69958e-20	1.40783e-18	FBgn0261873	sdt
RS010196	-1.03974	-0.175154	0.756151	0.772748	-0.211649	0.568912	3.48658	102.181	8.79536e-20	1.42186e-18	NA	NA
RS014482	-0.694783	-0.0263772	0.0263467	0.0809915	0.15908	0.0819215	5.53543	102.178	8.80807e-20	1.42243e-18	FBgn0003042	Pc
RS012630	-0.801704	0.23846	1.37726	0.277075	-0.139321	-0.0251204	4.86897	102.031	9.4526e-20	1.52494e-18	NA	NA
RS005476	0.431347	-0.0837416	0.0904492	0.0631011	0.063834	0.169119	8.95316	101.971	9.73307e-20	1.56856e-18	FBgn0013770	Cp1
RS002527	0.805893	0.167707	-0.206628	-0.582543	-0.0643681	-0.148574	5.78061	101.877	1.01833e-19	1.63942e-18	FBgn0030889	CG15373
RS005630	0.811609	0.056037	-0.182039	-0.0333237	-0.107154	-0.194285	5.71214	101.662	1.12894e-19	1.81562e-18	FBgn0033485	RpLP0-like
RS003159	-1.80646	0.0739625	-0.0778962	-0.539602	-0.35144	0.693006	3.19408	101.65	1.13529e-19	1.82395e-18	FBgn0262534	CG43088
RS008524	1.06765	-0.044964	-0.165716	0.187238	-0.0129558	-0.0507363	3.69315	101.435	1.25892e-19	2.0205e-18	FBgn0035827	Srp9
RS002487	-0.790586	-0.194736	-1.10174	-0.555719	-0.974629	0.350772	8.36001	101.429	1.26282e-19	2.02466e-18	FBgn0010385	Def
RS012433	-0.863486	-0.167479	0.25698	0.0171253	-0.101376	0.257401	6.55964	101.372	1.29767e-19	2.07665e-18	FBgn0025686	CG11592
RS004931	-1.19025	0.118307	0.0498596	0.313105	0.246243	-0.00524175	4.89554	101.372	1.2979e-19	2.07665e-18	FBgn0032614	CG13284
RS009664	-1.05977	-0.284457	0.000949623	-0.0249816	-0.159584	0.522499	10.6499	101.073	1.49853e-19	2.39518e-18	FBgn0038011	CG4066
RS008165	9.40627	-0.0114536	8.41981	8.54877	7.01166	-1.71779	2.41795	101.014	1.54181e-19	2.46067e-18	FBgn0038098	CG7381
RS010545	0.891145	0.205071	-0.158066	-0.0239442	0.095852	-0.180633	6.59804	101.012	1.54266e-19	2.46067e-18	FBgn0033507	CG12909
RS006459	9.68941	1.47786	8.55499	8.95982	7.48009	-3.19709	2.6567	100.973	1.57204e-19	2.50498e-18	FBgn0035094	CG9380
RS002136	0.427494	0.0380231	0.00190362	0.110404	0.130209	-0.0414841	8.50838	100.963	1.57942e-19	2.51416e-18	FBgn0028497	CG3530
RS006265	6.84078	1.61966	6.16087	5.81706	5.22804	-2.85285	0.444336	100.961	1.58103e-19	2.51416e-18	FBgn0029827	CG6048
RS006839	0.810515	-0.00588426	0.167026	-0.157235	-0.233227	-0.0894273	7.25112	100.84	1.6761e-19	2.66263e-18	FBgn0013272	Gp150
RS014896	-1.2118	-0.190809	0.563608	0.156837	0.086956	0.174824	4.52025	100.589	1.89059e-19	3.00029e-18	FBgn0011281	Pbprp3
RS003536	5.33877	0.770966	3.99278	4.14365	3.08065	-1.62471	1.47998	100.556	1.92145e-19	3.04617e-18	FBgn0032264	Lip4
RS008428	0.675055	0.0366876	-0.10583	-0.134175	-0.140331	-0.0923313	5.99052	100.513	1.96163e-19	3.10671e-18	FBgn0040623	Spase12
RS015384	-0.438149	0.0349633	0.114103	0.142215	0.0482872	0.0320236	9.92349	100.505	1.96883e-19	3.11495e-18	FBgn0010100	Acon
RS011520	0.999482	0.100222	-0.758613	-0.686479	-0.584921	-0.276789	6.39401	100.435	2.03603e-19	3.218e-18	FBgn0262720	CG43164
RS009674	-0.166586	0.079944	0.531602	0.587077	-0.118317	-0.140012	5.60152	100.336	2.13478e-19	3.37066e-18	FBgn0013812	Dhc93AB
RS008380	-0.928417	-0.154111	-0.54118	-0.554973	-0.546144	0.199247	5.2714	100.316	2.15553e-19	3.39997e-18	FBgn0036203	Muc68D
RS007834	-0.780613	0.154432	-0.118843	0.227007	-0.097869	0.0232906	7.99526	100.124	2.36451e-19	3.72584e-18	FBgn0028424	JhI-26
RS012089	-1.22909	-0.0727887	0.584549	0.518445	0.368417	0.165493	3.94273	100.117	2.37241e-19	3.7345e-18	FBgn0038420	CG10311
RS012644	-0.504272	-0.0158287	0.136245	0.307052	0.156889	0.15699	7.17077	100.101	2.39096e-19	3.75991e-18	FBgn0035228	CG12091
RS005190	-0.500736	0.0975176	0.203133	0.242171	0.267125	-0.0565362	6.66097	100.068	2.42902e-19	3.81592e-18	FBgn0003429	slo
RS008040	0.592129	-0.156536	-0.115519	-0.253819	-0.120282	0.161209	5.83245	100.001	2.50836e-19	3.93658e-18	NA	NA
RS008211	-0.943894	0.220678	-0.171829	0.0857273	0.0296405	-0.218905	5.94296	99.8613	2.68216e-19	4.20512e-18	FBgn0037902	CG5281
RS010163	-1.32391	-0.184814	0.218271	0.124984	0.107401	0.544928	9.84737	99.8344	2.71709e-19	4.25558e-18	FBgn0025454	Cyp6g1
RS015440	-0.870264	-0.167717	0.162862	-0.0336175	-0.0137875	0.21582	5.25811	99.7618	2.81354e-19	4.40222e-18	NA	NA
RS004297	-0.671863	0.0207924	-0.0523434	-0.149349	-0.0768395	0.168116	6.16711	99.7046	2.89188e-19	4.52026e-18	FBgn0033358	CG8216
RS008617	-0.973341	0.19133	0.323003	0.138274	0.267779	-0.151201	4.22364	99.644	2.97737e-19	4.64923e-18	FBgn0036116	CG7888
RS006624	6.76418	1.8443	5.5986	5.54382	4.82474	-3.58635	1.7782	99.6207	3.01078e-19	4.69669e-18	FBgn0038247	Cad88C
RS013513	5.27248	-1.72934	6.60091	5.95303	5.59585	0.820037	0.675486	99.5678	3.08825e-19	4.81273e-18	FBgn0003410	sina
RS007404	0.689363	0.239644	-2.40249	-0.240887	0.240161	-0.571156	2.65814	99.4812	3.21942e-19	5.01213e-18	FBgn0013953	Esp
RS004058	-1.06099	-0.268267	0.369943	0.415635	0.443769	0.359583	4.08552	99.4633	3.24719e-19	5.05032e-18	FBgn0263980	CG43729
RS003521	2.35332	0.336436	1.99897	2.23998	2.70497	-2.38371	0.968798	99.397	3.35234e-19	5.20866e-18	FBgn0039640	CG14516
RS011709	0.598144	-0.034763	-0.233194	0.0264518	-0.145149	-0.0994392	5.87132	99.3321	3.45845e-19	5.36817e-18	FBgn0001341	l(1)1Bi
RS011283	-0.84327	0.0392531	0.332448	0.374083	0.356007	0.122225	6.96625	99.0191	4.01932e-19	6.23255e-18	NA	NA
RS001245	-0.619299	-0.114935	-0.0568479	0.026876	-0.27595	0.131474	7.16557	98.9865	4.08282e-19	6.32472e-18	FBgn0029994	CG2254
RS013820	2.27823	0.25599	-0.656708	-0.683751	-0.0809031	-0.69517	6.42048	98.9467	4.16155e-19	6.44028e-18	FBgn0250907	Cht3
RS012859	1.37137	0.151966	-0.01431	-0.26706	0.0628899	-0.168376	3.40167	98.8332	4.39471e-19	6.79435e-18	FBgn0040765	luna
RS011901	-0.797482	-0.0447138	0.0566811	-0.0459276	0.302445	-0.00783811	4.79321	98.8275	4.40682e-19	6.80633e-18	FBgn0053556	form3
RS014321	0.541461	-0.0395375	-0.145036	-0.194606	-0.167715	0.0955637	8.85248	98.7238	4.63176e-19	7.14667e-18	FBgn0035871	BI-1
RS005182	-1.27272	-0.083631	0.360815	0.333602	0.11472	0.35951	3.77349	98.676	4.73937e-19	7.30547e-18	FBgn0016123	Aph-4
RS000103	-0.529258	0.110644	0.192315	0.224498	0.2367	0.097537	6.31613	98.3869	5.44495e-19	8.3848e-18	FBgn0000163	baz
RS013877	0.507285	0.039663	-0.300117	-0.103572	-0.219497	-0.0040193	7.53113	98.3743	5.47808e-19	8.42748e-18	FBgn0029785	RpL35
RS008245	-1.59432	-0.303397	0.398991	0.67695	0.045653	0.60663	2.78946	98.3565	5.52501e-19	8.4913e-18	FBgn0038803	CG5191
RS014686	0.521827	0.026405	-0.0177127	-0.00423893	0.070028	-0.0211515	7.16929	98.3414	5.56525e-19	8.54472e-18	FBgn0000181	bic
RS007213	0.705879	-0.00852405	-0.109623	-0.0872924	-0.11171	0.137976	5.0204	98.2138	5.91678e-19	9.07433e-18	FBgn0050410	Rpi
RS008326	0.535485	-0.108453	0.00560396	-0.0111844	-0.288081	0.161889	5.83992	98.212	5.92184e-19	9.07433e-18	FBgn0035592	CG10674
RS003180	1.39829	-0.00305658	-0.393384	-0.494065	-0.306307	-0.43932	3.48163	98.1557	6.08406e-19	9.31376e-18	FBgn0003174	pwn
RS005956	3.94416	-0.898599	1.70787	1.8427	1.27035	-0.482633	4.41905	98.1477	6.10757e-19	9.34056e-18	FBgn0259175	ome
RS013798	0.476839	-0.0243291	-0.0842844	-0.0597	-0.0413265	-0.00488489	7.65043	98.1289	6.16287e-19	9.4159e-18	FBgn0027588	CG14476
RS008234	0.708614	-0.09997	-0.136632	-0.0680083	0.0240239	0.0329046	6.14319	98.0866	6.28915e-19	9.59942e-18	FBgn0026252	msk
RS012512	0.610249	0.115393	-0.325822	-0.237133	-0.28301	0.0362918	5.26034	98.0079	6.53129e-19	9.95926e-18	NA	NA
RS014356	0.583539	0.058401	-0.240943	-0.205761	-0.174183	-0.174417	6.30875	97.9889	6.59125e-19	1.00409e-17	FBgn0261119	Prp19
RS011471	5.47696	1.01912	6.07946	6.5455	6.16616	-2.2291	0.787675	97.8649	6.99545e-19	1.06462e-17	FBgn0030318	rho-4
RS013882	0.650722	0.0704474	-0.117891	-0.0298937	0.0538288	-0.170525	7.161	97.7341	7.44868e-19	1.13249e-17	FBgn0033741	CG8545
RS006698	-0.517685	-0.0200614	-0.380489	0.940904	1.62739	0.340517	2.28772	97.5169	8.26708e-19	1.25569e-17	FBgn0259189	Ir7e
RS011424	4.58629	0.101812	3.86418	3.46166	3.28333	-1.34493	4.29149	97.318	9.0953e-19	1.38015e-17	FBgn0025620	CG13360
RS008250	-1.28376	0.045763	-0.731558	-0.507596	-0.438803	-0.275499	5.11231	96.8078	1.1618e-18	1.76123e-17	FBgn0030332	CG9360
RS003069	0.330632	-0.107761	0.190159	0.157727	0.228781	0.213343	6.6258	96.5674	1.3038e-18	1.97458e-17	FBgn0036814	CG14073
RS003016	-1.78767	0.237273	-1.01097	-0.987545	-0.855659	-0.901476	7.03567	96.4978	1.34806e-18	2.03963e-17	FBgn0030598	CG9503
RS014239	-0.985386	-0.0486407	-0.329058	-0.441218	-0.393874	0.187823	4.61901	96.4345	1.38964e-18	2.10051e-17	FBgn0046685	Wsck
RS009188	0.825441	0.00412641	-0.254048	-0.125867	-0.193542	-0.000586937	4.74774	96.3205	1.46773e-18	2.21638e-17	FBgn0039627	CG11837
RS003996	-1.03515	-0.0366808	-0.00943385	0.154222	0.14685	0.305196	5.7328	96.3174	1.46993e-18	2.21756e-17	FBgn0039594	CG9990
RS014830	0.5998	0.125017	0.331832	0.182812	0.237867	0.123319	6.86064	96.2382	1.52683e-18	2.30117e-17	FBgn0024320	Npc1a
RS008570	0.587195	-0.0927471	-0.0154653	0.332218	-0.14551	0.0847395	6.3586	96.2075	1.54946e-18	2.33303e-17	FBgn0010638	Sec61beta
RS002285	0.312371	-0.13935	-0.0417008	-0.241857	-0.252727	0.215362	6.53829	96.1997	1.55531e-18	2.33957e-17	FBgn0000206	boss
RS001772	-0.578385	-0.481418	1.51212	-0.0491212	0.201582	0.151496	2.44561	96.1869	1.56485e-18	2.35165e-17	FBgn0032713	CG17323
RS000278	0.585812	0.02089	-0.306889	-0.184524	-0.138253	-0.155822	7.49519	96.0751	1.65105e-18	2.47881e-17	FBgn0036838	CG3808
RS009150	6.37579	0.00744446	5.42744	5.31017	4.83232	-1.57701	0.0919391	95.9113	1.78598e-18	2.6788e-17	NA	NA
RS004332	0.699425	0.0638089	-0.0228141	-0.0419662	-0.0895384	-0.0661841	5.91133	95.8567	1.83338e-18	2.74725e-17	FBgn0040512	zetaCOP
RS011788	-0.532464	-0.0283679	0.239801	0.180803	0.279496	0.123998	7.66076	95.8519	1.83765e-18	2.751e-17	FBgn0259212	cno
RS012438	-1.80227	-0.114406	0.563679	0.340526	0.131228	-0.129879	1.88545	95.5549	2.11889e-18	3.16898e-17	NA	NA
RS011077	-0.894814	-0.149539	0.0786497	0.0401497	-0.0112962	0.37741	7.23235	95.5287	2.14569e-18	3.20598e-17	FBgn0259143	CG42258
RS000070	0.788503	-0.163136	-0.100076	0.0369825	0.0371927	0.179948	5.53478	95.5035	2.17179e-18	3.24187e-17	FBgn0001330	kz
RS007460	-0.756947	-0.0656655	-0.193043	-0.175279	-0.196723	0.223663	6.51399	95.4605	2.21698e-18	3.30616e-17	FBgn0004648	svr
RS006078	-1.10813	-0.318046	-0.0457882	-0.36153	0.368609	0.522516	3.72076	95.3873	2.29622e-18	3.42106e-17	FBgn0029843	Nep1
RS003878	-0.352831	0.086454	0.280049	0.237046	0.285465	0.0307851	8.94402	95.3445	2.34376e-18	3.48855e-17	FBgn0036203	Muc68D
RS000349	1.48789	-0.174212	0.411505	0.262657	0.0638129	0.814686	6.2341	95.1685	2.55018e-18	3.79217e-17	FBgn0034426	CG10476
RS007850	1.6392	-0.284766	-0.124461	-0.378805	-0.350129	0.364183	2.10044	95.0847	2.6547e-18	3.94384e-17	FBgn0086673	CG13272
RS008618	-0.854673	-0.0357088	0.149187	0.0460302	-0.186982	0.194735	5.08914	95.0653	2.67955e-18	3.97696e-17	FBgn0036116	CG7888
RS001683	-0.701405	0.0755733	0.178925	0.244154	0.324653	0.0673272	4.91625	94.9851	2.78458e-18	4.12892e-17	FBgn0262738	norpA
RS002101	-0.478194	-0.0873703	0.217479	0.0721892	0.0846414	0.0550276	7.18139	94.9245	2.86654e-18	4.24641e-17	FBgn0263120	Acsl
RS000868	-0.580144	-0.0514058	0.126508	0.0648355	0.0141834	0.110336	8.9527	94.8657	2.94859e-18	4.3638e-17	FBgn0002921	Atpalpha
RS001205	0.626658	0.159096	-0.151779	-0.00562925	0.0196354	-0.1459	6.49422	94.8553	2.96332e-18	4.38144e-17	FBgn0028744	CG5033
RS003907	-0.428694	-0.0026986	0.0540767	0.0223617	-0.0422748	0.0594818	8.47839	94.6819	3.22008e-18	4.75657e-17	FBgn0029891	Pink1
RS014152	-1.02568	-0.0719869	0.124882	-0.282948	-0.235158	0.226192	6.22258	94.3762	3.72831e-18	5.50208e-17	FBgn0037690	Task7
RS010057	1.7633	0.433491	-1.71518	-2.28036	-0.838839	-0.459035	1.52187	94.3719	3.73597e-18	5.50669e-17	NA	NA
RS009269	-1.54521	0.20381	0.903034	0.170876	0.995152	-0.233356	1.86575	94.3705	3.7385e-18	5.50669e-17	FBgn0043884	mask
RS005210	-0.929722	-0.358271	0.0108107	-0.206599	-0.178655	0.680259	5.37336	94.3623	3.75321e-18	5.52314e-17	FBgn0004512	Mdr49
RS007588	-1.61514	-0.220213	0.642769	0.866295	0.437305	-0.010613	2.16812	94.3313	3.80928e-18	5.60036e-17	FBgn0039313	CG11892
RS003369	5.42612	-1.8199	7.65135	7.79852	8.26589	1.01142	2.20584	94.307	3.85391e-18	5.66063e-17	FBgn0038420	CG10311
RS010829	0.674239	0.115219	0.129626	0.0412339	-0.08221	-0.164448	5.8716	94.3014	3.86424e-18	5.67046e-17	FBgn0027086	Aats-ile
RS005383	-0.656721	-0.110057	0.220348	0.16364	-0.0375119	0.20713	5.94455	94.1842	4.0875e-18	5.99244e-17	FBgn0038143	CG9813
RS001187	-0.378323	-0.371407	5.00597	5.42235	5.62325	0.498942	1.49343	94.0343	4.39196e-18	6.43273e-17	NA	NA
RS001655	-1.07098	-0.0557931	0.278687	0.222916	0.431269	0.203117	3.84604	93.9045	4.67383e-18	6.83916e-17	FBgn0260487	CG42534
RS009533	-0.547667	0.135455	-0.14466	0.0611496	-0.0175867	-0.0267622	7.2204	93.8531	4.79026e-18	7.00295e-17	FBgn0036492	Best3
RS004610	-0.348461	0.0624055	0.0195176	0.115419	0.108884	-0.022817	8.42359	93.7381	5.06181e-18	7.39299e-17	FBgn0036340	SRm160
RS013030	6.57472	0.275659	4.94102	4.14977	4.37121	-1.39734	5.38552	93.6513	5.27655e-18	7.69941e-17	FBgn0051410	Npc2e
RS002160	0.619566	-0.0167498	0.134214	0.0748366	0.174312	-0.08655	6.22632	93.6329	5.32349e-18	7.76065e-17	FBgn0003391	shg
RS000208	1.56352	0.0932955	0.108652	0.0557365	0.300311	-0.0665945	2.71999	93.5849	5.44728e-18	7.93369e-17	NA	NA
RS010696	-0.581139	-0.0119553	-0.159931	-0.0507736	-0.17682	-0.128141	5.60171	93.4536	5.80075e-18	8.44061e-17	FBgn0016013	Faa
RS002705	2.95161	1.17727	0.358504	0.724237	0.429678	-1.09169	1.57311	93.4023	5.94509e-18	8.64256e-17	NA	NA
RS009490	5.90746	0.182464	5.47085	3.62991	3.11718	-2.18379	-0.311532	93.3279	6.16081e-18	8.94782e-17	NA	NA
RS015550	-0.252951	0.0579095	0.115083	0.167302	0.177952	0.0347571	8.27902	93.2899	6.2742e-18	9.10402e-17	FBgn0032796	CG10188
RS006949	-1.08923	-0.111466	0.269238	0.0868884	0.193545	0.414962	6.32309	93.2514	6.3908e-18	9.26457e-17	NA	NA
RS009613	-1.07781	-0.0628347	0.103335	0.0367051	-0.209385	0.218122	4.22334	93.2066	6.5294e-18	9.45671e-17	NA	NA
RS004491	-0.990446	0.0841307	0.194185	0.0276959	-0.0836293	0.16255	4.57058	93.1721	6.63824e-18	9.60541e-17	FBgn0035542	DOR
RS010957	-0.636004	0.073699	0.311474	-0.00130772	-0.0883223	0.089314	8.33675	93.144	6.72824e-18	9.72661e-17	FBgn0022774	Oat
RS001850	-0.835755	-0.149891	-0.109548	-0.0287936	-0.0608409	0.0615806	4.82189	93.1127	6.82976e-18	9.86423e-17	NA	NA
RS003375	-0.535516	0.068849	0.459385	0.461185	0.421502	-0.0353488	5.95491	93.0656	6.98555e-18	1.00799e-16	FBgn0034788	CG13532
RS001595	0.315246	-0.10374	-0.226942	0.247297	0.0917227	0.0477807	8.11074	93.0605	7.00279e-18	1.00954e-16	FBgn0039755	CG15531
RS011383	-0.671695	-0.202802	0.0336573	0.0478979	-0.120534	0.150611	6.38827	92.9595	7.34995e-18	1.05861e-16	FBgn0034488	CG11208
RS013083	0.768359	-1.48921	0.248599	0.980181	0.534343	2.2411	2.31649	92.8005	7.93144e-18	1.14131e-16	FBgn0032382	Mal-B2
RS010331	0.799641	0.0107566	0.147807	0.00597178	-0.00157012	-0.0787566	6.07127	92.6903	8.36117e-18	1.20203e-16	FBgn0037279	CG1129
RS014695	-1.8737	-0.29917	0.365178	-0.30856	-0.21196	0.708924	2.25223	92.673	8.43083e-18	1.21093e-16	FBgn0033809	CG4630
RS004394	-0.280879	0.100084	0.20414	0.0964005	0.231533	-0.0333086	11.0612	92.5776	8.82504e-18	1.26639e-16	NA	NA
RS015300	6.249	1.63212	3.7277	3.07297	3.71506	-2.74035	0.0761521	92.5629	8.88725e-18	1.27414e-16	FBgn0036494	Toll-6
RS003625	-0.400779	0.0433774	0.133072	0.104862	0.00557136	0.057537	6.95166	92.5573	8.91125e-18	1.27641e-16	FBgn0004242	Syt1
RS013012	-0.81689	0.1485	0.687916	-0.272769	-0.456111	0.313071	3.17879	92.5348	9.00761e-18	1.28902e-16	FBgn0037906	PGRP-LB
RS010599	-1.61479	-0.227326	0.258232	0.0243044	-0.188141	0.576711	2.72887	92.4109	9.55823e-18	1.36656e-16	FBgn0033058	CCHa2r
RS006595	0.214396	0.338576	-1.47248	-1.19491	-1.63024	-0.693464	2.64163	92.4005	9.60604e-18	1.37214e-16	FBgn0023171	rnh1
RS004303	4.14089	0.0876531	2.95686	2.38841	2.0574	-1.69315	1.87247	92.3928	9.64153e-18	1.37595e-16	FBgn0054045	CG34045
RS012986	-0.436309	0.266636	1.36068	0.990633	1.31975	-0.126744	7.85963	92.3453	9.8634e-18	1.40632e-16	FBgn0039590	CG10011
RS005977	-0.297025	0.124415	0.00435428	0.160497	0.157501	-0.0807365	8.46982	92.3356	9.90918e-18	1.41156e-16	FBgn0031883	CG11266
RS014192	0.50839	-0.153324	-0.0824174	0.0226703	-0.155442	0.118966	7.12021	92.319	9.98839e-18	1.42154e-16	FBgn0003514	sqh
RS012781	-0.275604	-0.0664623	-0.772898	-1.11902	-0.638941	-0.361414	4.38497	92.2158	1.04943e-17	1.49218e-16	FBgn0260745	mfas
RS005761	-0.639608	-0.112822	0.279997	-0.198894	-0.282736	0.271017	5.14671	92.198	1.05839e-17	1.50355e-16	FBgn0050197	CG30197
RS013240	-0.684621	-0.143554	-0.182079	-0.156352	-0.26645	0.253977	8.8774	92.117	1.10025e-17	1.56159e-16	FBgn0034583	CG10527
RS005857	0.602883	0.0189409	-0.0451168	-0.0043015	-0.0062186	-0.0687508	7.99437	92.1144	1.10161e-17	1.5621e-16	FBgn0002626	RpL32
RS004767	-0.101496	-0.332279	-1.28277	-1.97212	-1.43773	-0.00888626	7.88446	92.0723	1.12404e-17	1.59246e-16	FBgn0034741	CG4269
RS012253	1.85719	0.608417	-1.27183	-1.24038	-0.549602	-1.42954	2.33096	91.93	1.2033e-17	1.7032e-16	FBgn0030051	spirit
RS002283	-1.639	-0.568801	0.688272	0.738716	0.319172	0.911834	2.58469	91.914	1.21253e-17	1.7147e-16	FBgn0025679	Bteb2
RS011131	0.66005	-0.0203022	-0.251422	-0.182402	-0.18181	-0.00409888	6.61538	91.9052	1.21766e-17	1.7204e-16	FBgn0036334	CG11267
RS011829	0.827937	-0.265851	0.173594	-0.0101271	0.0494665	0.151446	4.97803	91.8853	1.2293e-17	1.73527e-16	FBgn0004449	Ten-m
RS012776	0.576173	0.0406427	-0.0951936	0.0103646	-0.0037735	-0.0972073	7.87117	91.7332	1.32217e-17	1.86467e-16	FBgn0010265	RpS13
RS008140	-0.50301	0.0962632	0.179644	0.223656	0.236093	-0.0117893	7.20473	91.7164	1.33283e-17	1.87802e-16	FBgn0032243	Klp31E
RS002907	-0.218549	0.491014	1.0461	0.768343	-2.14763	-0.135866	1.79055	91.6751	1.35943e-17	1.91376e-16	FBgn0261788	Ank2
RS009934	-1.23444	-0.0491813	0.376094	0.353373	0.208902	0.180556	5.84525	91.5974	1.41093e-17	1.98448e-16	FBgn0035917	Zasp66
RS013859	-0.577401	-0.0358869	0.0990722	0.0758258	-0.0110982	0.186598	7.23358	91.5887	1.41683e-17	1.99097e-16	FBgn0051057	tau
RS001862	-0.890058	-0.341199	0.276114	-0.209347	-0.061359	0.403262	5.53069	91.5852	1.41923e-17	1.99197e-16	FBgn0033058	CCHa2r
RS008832	0.521998	-0.0411378	0.225219	0.143777	0.133929	-0.00454842	7.94267	91.5839	1.4201e-17	1.99197e-16	FBgn0262125	sec23
RS003372	0.266784	0.147916	-1.64464	-0.670616	-1.42809	-0.363185	2.76021	91.5688	1.43041e-17	2.00463e-16	FBgn0032713	CG17323
RS014657	6.96785	-0.0134171	4.9974	5.08799	4.77991	0.143433	0.923412	91.5563	1.43902e-17	2.01488e-16	FBgn0027611	CG6206
RS012085	-0.774985	-0.0111576	0.0355212	0.0836661	-0.0983111	-0.017597	5.82125	91.4092	1.54393e-17	2.15984e-16	FBgn0030968	CG7322
RS002835	1.14097	0.0213877	0.086328	-0.216511	-0.0385689	0.374704	3.10559	91.3858	1.56135e-17	2.18224e-16	FBgn0261953	AP-2
RS001796	-0.964064	-0.190155	0.109997	-0.133669	-0.151282	0.382471	4.97013	91.383	1.56343e-17	2.1832e-16	FBgn0039640	CG14516
RS002010	2.81246	-0.375459	2.25656	1.47405	1.64267	-0.459707	1.09732	91.3677	1.57495e-17	2.19732e-16	FBgn0259677	CG42346
RS001084	0.820976	0.125935	-0.161641	-0.191442	-0.253307	-0.250751	5.15856	91.3282	1.60496e-17	2.23718e-16	FBgn0039302	Nup358
RS000812	-3.08512	-0.0699544	0.498884	0.358957	0.23885	1.25205	1.23026	91.3221	1.60969e-17	2.24176e-16	FBgn0033978	Cyp6a23
RS006231	-0.47698	0.0224756	0.0746374	-0.16339	0.770481	0.110771	5.21469	91.3126	1.61697e-17	2.2499e-16	NA	NA
RS001674	-0.609368	-0.19276	-0.118629	-0.33109	-0.393483	0.100212	6.11259	91.3045	1.62328e-17	2.25666e-16	FBgn0031148	Cbs
RS011207	0.755836	0.108148	-0.0822423	-0.27607	-0.122498	0.00711489	4.99295	91.2781	1.64394e-17	2.28335e-16	FBgn0036545	GXIVsPLA2
RS004341	1.32077	-0.397908	-0.226438	0.12423	0.285241	0.265826	2.69451	91.2456	1.66966e-17	2.31701e-16	FBgn0014143	croc
RS005408	-0.980266	-0.257373	0.438082	0.397353	0.131174	0.700839	4.8064	91.1472	1.75018e-17	2.42659e-16	FBgn0011236	ken
RS000884	-0.65614	-0.0421988	0.0826617	0.191634	0.149879	0.0775366	8.56261	91.1402	1.75605e-17	2.43256e-16	FBgn0261788	Ank2
RS013858	-0.733779	0.0527064	-0.0384533	0.0512283	-0.0583851	0.0679565	10.3815	91.084	1.80396e-17	2.4967e-16	FBgn0002772	Mlc1
RS010666	0.951486	0.159909	-0.629965	-0.612784	-0.314525	-0.44046	4.45121	91.0669	1.81875e-17	2.51494e-16	FBgn0030955	CG6891
RS009346	5.60145	-1.14882	4.10048	4.29483	4.15593	-0.229622	3.56036	91.0554	1.82879e-17	2.52659e-16	FBgn0032144	CG17633
RS010475	-0.370084	-0.0046708	0.252595	0.262192	0.211982	0.039525	7.63711	91.0114	1.8677e-17	2.57806e-16	FBgn0031374	CG7337
RS011674	-0.593403	-0.188459	0.184374	-0.304206	-0.163618	0.0802047	5.52648	90.798	2.06851e-17	2.85272e-16	FBgn0036040	CG6749
RS000681	-1.83199	-0.270721	0.131311	0.407057	-0.171888	0.665279	3.66527	90.7252	2.14184e-17	2.95124e-16	FBgn0051522	CG31522
RS000843	-1.72237	0.0257264	0.526837	0.0903708	0.54846	0.176247	2.17771	90.658	2.21176e-17	3.04488e-16	FBgn0015032	Cyp4c3
RS011932	0.497995	0.00649013	0.129319	0.0562242	0.0650958	-0.0563751	7.03028	90.6137	2.2592e-17	3.10525e-16	FBgn0026150	ApepP
RS000302	-0.583248	-0.12468	-0.0393927	0.00874034	-0.116951	-0.00388698	6.97403	90.6133	2.2596e-17	3.10525e-16	FBgn0263258	chas
RS012910	4.0659	0.137883	2.78255	2.63913	2.33635	-1.51749	5.12584	90.539	2.34136e-17	3.21479e-16	FBgn0051004	CG31004
RS010333	-0.846636	-0.14596	-0.118245	-0.122433	-0.346101	0.282146	5.89499	90.5235	2.35875e-17	3.23581e-16	FBgn0035501	CG1299
RS004692	-0.815743	-0.238748	0.238077	0.236641	0.25536	0.253208	6.31457	90.5186	2.36438e-17	3.24067e-16	FBgn0041210	HDAC4
RS010270	0.679427	-0.151196	0.110446	0.133664	0.0250725	0.191482	6.62286	90.469	2.42113e-17	3.31555e-16	FBgn0034371	SP2637
RS014761	0.652817	-0.0709741	0.0154287	-0.0164078	0.0377692	0.0355872	5.60462	90.3917	2.51225e-17	3.43731e-16	FBgn0016041	Tom40
RS010013	0.486678	-0.00106631	-0.190192	-0.0970406	-0.121716	-0.080175	6.82836	90.3661	2.54329e-17	3.47673e-16	FBgn0040227	eIF-3p66
RS003877	-0.514812	-0.110426	0.698902	0.686446	0.881661	0.278385	5.33416	90.162	2.80402e-17	3.82978e-16	FBgn0036282	Smyd4
RS010062	3.54494	0.625506	-1.1448	-1.25534	0.179323	-0.875185	2.36108	90.1594	2.80751e-17	3.83119e-16	FBgn0036678	CG11905
RS006290	-1.18372	-0.203541	0.155106	0.175344	0.322057	0.36908	3.81712	90.1102	2.8744e-17	3.91577e-16	FBgn0259179	CG42284
RS008254	-1.38985	-0.240094	0.077211	0.599952	0.0467467	0.671407	3.31927	90.1101	2.87452e-17	3.91577e-16	FBgn0051100	CG31100
RS011299	-0.836652	-0.030988	0.00306786	-0.0843721	-0.270368	-0.0345639	4.58695	89.9431	3.11364e-17	4.23781e-16	FBgn0261053	Cad86C
RS006211	3.57054	0.33377	4.29198	3.46627	3.42518	-1.09022	1.27537	89.7644	3.39133e-17	4.61174e-16	NA	NA
RS008469	2.46525	0.119591	0.275065	0.311679	-0.148771	-0.122745	2.73557	89.7	3.49741e-17	4.75184e-16	FBgn0000964	tj
RS010825	-0.42746	0.0967573	0.0341486	0.12468	-0.118368	-0.104953	6.84829	89.6625	3.56066e-17	4.83357e-16	FBgn0032820	fbp
RS010180	0.531085	0.0996492	-0.326486	-0.203568	-0.183081	-0.159056	8.71445	89.6034	3.66282e-17	4.96792e-16	FBgn0003274	RpLP2
RS015520	-0.757332	0.0117497	0.101454	0.0442682	0.00900389	-0.101754	6.02753	89.5142	3.8224e-17	5.17985e-16	FBgn0036967	CG6597
RS004137	-0.901775	-0.342213	-0.053275	-0.179387	-0.356393	0.440267	5.67865	89.3835	4.06894e-17	5.50916e-16	FBgn0036659	CG9701
RS015189	-0.651468	0.151913	0.113513	0.399934	0.228082	-0.0742857	4.77267	89.2909	4.25301e-17	5.75338e-16	FBgn0023416	Ac3
RS003477	0.439104	0.0231009	-0.518998	-0.526166	-0.346421	-0.130569	5.74981	89.2525	4.33183e-17	5.85491e-16	FBgn0031484	CG3165
RS002012	3.92871	-0.13392	2.96608	2.03533	2.74589	-0.920766	0.632355	89.1751	4.4952e-17	6.07047e-16	FBgn0052055	CG32055
RS006672	0.698602	0.00846333	0.027205	0.165754	0.0265923	-0.0388852	5.53184	89.0751	4.71524e-17	6.36211e-16	FBgn0032873	CG2614
RS012785	0.502489	-0.281384	0.490164	0.628308	0.243216	0.373347	8.74384	88.9774	4.9408e-17	6.66068e-16	FBgn0038507	CG5863
RS014100	-0.675371	0.121144	-0.460665	-0.721709	-0.920299	0.0816928	6.73823	88.9318	5.04957e-17	6.80143e-16	NA	NA
RS008046	0.769809	0.108418	0.0496076	0.198477	0.0216606	-0.126334	5.81844	88.7629	5.47405e-17	7.3668e-16	NA	NA
RS015346	0.496166	0.0451848	0.0617071	0.0658051	0.042484	-0.037024	7.31813	88.7503	5.50725e-17	7.40509e-16	FBgn0000566	Eip55E
RS004609	-0.749885	0.0130256	0.480842	0.1677	0.31659	0.165515	6.68675	88.6718	5.71793e-17	7.68174e-16	FBgn0036203	Muc68D
RS010352	-1.41895	-0.0731311	-0.416537	-0.331071	0.120995	-0.0165905	3.31002	88.6202	5.86058e-17	7.86661e-16	NA	NA
RS013197	-0.479644	-0.0324465	-0.148164	-0.246772	-0.3175	0.177259	7.63386	88.4792	6.2691e-17	8.40389e-16	FBgn0030485	CG1998
RS011653	5.49528	0.437088	4.18291	3.94779	3.91722	-1.78756	3.71261	88.4784	6.27164e-17	8.40389e-16	FBgn0020503	CLIP-190
RS009301	1.75337	-0.791494	3.16155	2.66739	1.25383	0.76065	0.729761	88.4425	6.38e-17	8.54175e-16	FBgn0032497	CG6043
RS008706	0.544244	-0.0637652	0.245527	0.213899	0.29127	-0.015304	6.79116	88.4302	6.41761e-17	8.58473e-16	FBgn0031069	Pmp70
RS004422	-1.07675	0.297511	0.161234	0.302273	0.296126	-0.257698	2.9486	88.4014	6.50652e-17	8.6962e-16	FBgn0015032	Cyp4c3
RS008452	0.466563	-0.0856698	-0.12003	0.00519547	-0.00601748	0.0131774	6.63282	88.3773	6.5819e-17	8.78941e-16	FBgn0026380	Prosbeta3
RS006684	0.606587	-0.219508	0.152032	-0.0305913	-0.0744081	0.0697031	6.18922	88.3319	6.72622e-17	8.97443e-16	NA	NA
RS004166	-1.85389	-0.112942	0.324482	0.26086	0.0687152	0.880976	4.65792	88.319	6.76793e-17	9.02236e-16	FBgn0259247	laccase2
RS006174	-0.633125	-0.0233717	0.259576	0.152583	0.252391	0.0148247	5.58429	88.3052	6.81253e-17	9.07406e-16	FBgn0259166	CG42271
RS013729	-1.4708	0.122843	0.639505	0.739225	0.681023	0.083632	2.40552	88.2923	6.85476e-17	9.12251e-16	FBgn0035807	CG7492
RS015059	-0.69354	-0.273681	0.154872	0.252431	-0.0657086	0.310831	6.24905	88.0662	7.63687e-17	1.01547e-15	FBgn0032151	nAcRalpha-30D
RS005608	-0.601748	0.0970666	-0.106257	-0.213813	-0.343547	0.0562986	5.99512	88.0367	7.74544e-17	1.02903e-15	FBgn0039165	CG6204
RS011297	-0.331946	0.152352	-0.0420957	-0.17541	-0.307679	-0.0726027	7.56988	87.9748	7.97794e-17	1.05901e-15	FBgn0002789	Mp20
RS000896	-0.176767	-0.110528	-0.32168	-0.340814	-0.437545	0.0691232	9.25914	87.9093	8.23146e-17	1.09174e-15	FBgn0030731	Mfe2
RS010474	0.534363	-0.0221425	0.077793	0.12023	0.22505	0.0570885	6.73009	87.8473	8.47893e-17	1.1236e-15	FBgn0033661	CG13185
RS000025	0.559135	-0.12373	0.0882416	0.0412911	0.0648593	0.0283798	5.61706	87.7359	8.94221e-17	1.18399e-15	FBgn0031256	CG4164
RS003413	0.610837	-0.114377	-0.0599718	-0.0778158	-0.156051	0.0387531	7.12669	87.5493	9.77585e-17	1.29327e-15	FBgn0086443	Aats-asn
RS013759	0.535155	0.0966685	-0.125431	0.000357855	-0.0690213	-0.0889718	7.52183	87.4342	1.03286e-16	1.36523e-15	FBgn0086710	RpL30
RS003356	0.562506	0.000470091	0.0301619	0.0708087	0.0149073	-0.0561727	6.47067	87.4312	1.03434e-16	1.36603e-15	FBgn0024509	sec13
RS002516	3.37927	-0.531496	2.78879	2.17167	2.24863	-0.342091	1.52168	87.3351	1.08293e-16	1.42899e-15	FBgn0260753	Pdfr
RS013422	-1.16929	-0.156469	0.486955	0.107786	0.161059	0.254206	7.16113	87.3235	1.08895e-16	1.43572e-15	FBgn0031109	Obp19a
RS007096	0.142599	0.0256508	-0.699832	-0.417006	-0.661204	-0.00238932	5.87916	87.2629	1.12093e-16	1.47663e-15	FBgn0039650	Mesh1
RS008661	-0.551538	0.0192048	-0.176951	-0.177874	-0.382482	-0.118445	7.7691	87.0776	1.22464e-16	1.61189e-15	NA	NA
RS004004	1.45471	0.192754	-0.815923	-0.933055	-0.437585	-0.42336	4.2049	86.9335	1.31188e-16	1.72526e-15	FBgn0001321	knk
RS008641	-0.512205	0.0268083	0.142258	0.0999282	0.128624	-0.0238462	7.84386	86.8838	1.34336e-16	1.76517e-15	FBgn0000247	ca
RS002190	-0.928928	0.124352	0.404085	0.337974	0.385389	0.142893	4.13721	86.8716	1.35122e-16	1.774e-15	FBgn0050502	fa2h
RS003027	5.99301	-1.10286	4.2884	4.16238	3.83131	0.149179	4.48019	86.8683	1.35336e-16	1.77531e-15	NA	NA
RS009693	-1.05092	0.147331	-0.0928661	-0.276072	-0.251675	0.154407	9.68744	86.8606	1.35833e-16	1.78034e-15	FBgn0031781	Arc-p20
RS015032	0.421484	0.00733382	-0.0439189	-0.00997549	-0.0202993	-0.026274	6.79604	86.8587	1.35959e-16	1.78049e-15	FBgn0032596	CG17331
RS012269	0.599138	-0.0456182	-0.0255313	-0.0404028	0.00272784	0.0571714	7.93844	86.7655	1.42142e-16	1.8599e-15	FBgn0010412	RpS19a
RS010891	-0.711825	0.0171601	0.00376793	-0.0782229	-0.30865	0.194791	9.43782	86.7446	1.43567e-16	1.87697e-15	FBgn0027843	CAH2
RS014378	-0.727777	0.181562	-0.115123	0.0699478	0.0102486	-0.234927	4.69078	86.7059	1.46248e-16	1.91041e-15	NA	NA
RS003762	0.595821	0.0429242	-0.0150776	-0.0693595	-0.137397	-0.0289902	7.17935	86.6582	1.49617e-16	1.95279e-15	FBgn0032398	CG6766
RS007302	1.90414	0.417179	-0.771046	-0.177086	0.225551	-0.649569	3.65586	86.5954	1.54171e-16	2.01055e-15	FBgn0039069	CG6763
RS003462	0.977233	0.155445	0.0563976	0.0243586	0.022077	-0.229261	5.06735	86.5289	1.59146e-16	2.07368e-15	FBgn0027091	Aats-cys
RS014467	1.571	-0.143102	-0.922132	-1.44105	-0.864708	-0.611182	2.44303	86.5217	1.5969e-16	2.07903e-15	FBgn0038492	Mur89F
RS008851	1.85163	0.240286	0.12048	-0.202042	-0.364112	-0.300567	3.05582	86.4577	1.64646e-16	2.14177e-15	FBgn0025454	Cyp6g1
RS009612	-1.56369	0.0828934	0.218188	0.432045	-0.446943	0.193974	2.55458	86.4463	1.65544e-16	2.15166e-15	NA	NA
RS002512	-2.08565	-0.363624	0.467735	0.129837	0.015688	1.06113	2.04482	86.4111	1.68348e-16	2.18628e-15	FBgn0036939	CG7365
RS015197	1.46701	0.154379	0.063187	-0.0307331	-0.18446	-0.0322971	7.19857	86.3891	1.70128e-16	2.20755e-15	FBgn0031913	CG5958
RS009326	-1.18546	0.14973	0.287973	0.240412	-0.0234379	-0.216757	6.52038	86.3854	1.70432e-16	2.20966e-15	NA	NA
RS007003	1.19343	0.0927804	0.137583	0.498024	0.726855	0.116619	6.52419	86.2647	1.80533e-16	2.33767e-15	FBgn0040259	Ugt86Da
RS012934	-0.560925	0.0897149	0.0468701	0.177274	0.0632526	-0.076559	6.18669	86.2623	1.80741e-16	2.33767e-15	FBgn0021979	l(2)k09913
RS005557	0.412478	0.0337327	0.126506	0.0805501	0.040264	-0.0670333	6.96488	86.2622	1.80755e-16	2.33767e-15	FBgn0032846	CG10721
RS009057	1.87601	0.104988	4.21772	2.5806	3.32105	-1.4337	0.706186	86.227	1.83812e-16	2.37523e-15	FBgn0036494	Toll-6
RS015306	0.724988	-0.117553	-0.488835	-0.416239	-0.184114	0.00559869	4.48984	86.1957	1.86582e-16	2.40903e-15	FBgn0031961	CG7102
RS015414	0.211541	-0.0396408	-0.323239	-0.235668	-0.319077	0.136348	7.63165	86.1777	1.88189e-16	2.42777e-15	FBgn0034753	CG2852
RS010159	-0.654406	-0.0240552	-0.178618	-0.376232	-0.611196	0.234933	6.31157	86.1451	1.91141e-16	2.46303e-15	FBgn0037146	CG7470
RS007349	-0.547386	0.0622525	0.163929	0.258315	0.144597	0.127427	7.11102	86.144	1.91239e-16	2.46303e-15	NA	NA
RS008167	2.47523	-0.312522	2.16533	1.6076	1.4507	-0.739486	0.871997	86.0791	1.97264e-16	2.53853e-15	FBgn0038098	CG7381
RS008943	3.98249	-3.10789	6.9543	6.05006	5.51494	2.35738	0.739011	85.9882	2.0601e-16	2.6489e-15	FBgn0032436	CG5418
RS005507	5.70924	-3.44602	3.89755	2.82068	2.43189	1.92048	2.52425	85.9281	2.12006e-16	2.72375e-15	FBgn0035888	CG7120
RS008750	6.64178	0.228648	1.96979	1.4304	1.075	-1.5208	7.47353	85.9034	2.14516e-16	2.75372e-15	FBgn0034128	CG4409
RS001928	0.569588	0.0226037	0.0730611	0.0416851	-0.0569436	-0.0076011	8.03456	85.8957	2.15301e-16	2.76153e-15	FBgn0028327	l(1)G0320
RS011506	1.10657	0.0257017	0.153246	-0.1245	0.119518	0.0562172	4.55747	85.8553	2.19502e-16	2.81309e-15	FBgn0031191	Cp110
RS007435	-0.94863	-0.0590665	-0.0267999	-0.330295	-0.104774	0.0977833	4.13966	85.8386	2.21259e-16	2.83327e-15	FBgn0029791	CG4096
RS011090	0.909681	0.159561	-0.15538	0.0134222	-0.0453941	-0.292893	4.59473	85.691	2.37401e-16	3.03749e-15	FBgn0010339	128up
RS005693	0.954593	-0.0213526	-0.34928	-0.401636	-0.463834	0.376249	7.38337	85.6629	2.40604e-16	3.07595e-15	FBgn0034909	CG4797
RS014459	0.992383	-0.0360252	0.021717	-0.0563353	0.0211363	-0.170809	5.37782	85.3903	2.74032e-16	3.50042e-15	FBgn0016076	vri
RS007225	-1.15351	0.0200576	0.448876	0.533105	0.584229	0.314884	4.72607	85.3237	2.82881e-16	3.61049e-15	NA	NA
RS011032	-0.62451	0.0541791	-0.0792522	0.0167307	-0.0489517	0.0150783	6.01984	85.2775	2.89177e-16	3.68783e-15	FBgn0033543	CG12338
RS010858	3.5217	0.30234	2.6426	1.40029	0.833981	-1.42052	0.324875	85.2731	2.89781e-16	3.69252e-15	NA	NA
RS015310	-1.10163	-0.0223666	-0.0639722	0.0746959	0.0101254	0.256934	4.67477	85.2453	2.93655e-16	3.73882e-15	FBgn0052091	CG32091
RS012838	0.401038	-0.0844777	-0.0153219	0.0266057	-0.024538	0.0292753	6.84491	85.2001	3.00065e-16	3.81732e-15	FBgn0020443	Elf
RS002669	0.550147	0.10725	-0.286159	-0.198581	-0.0853813	-0.185167	7.42448	85.1828	3.02549e-16	3.84578e-15	FBgn0015907	bl
RS002836	1.46156	-0.0469037	0.334921	0.0841302	0.0186174	0.282622	2.31511	85.1714	3.04198e-16	3.86359e-15	NA	NA
RS012909	-0.629935	-0.165323	0.187874	0.00244711	0.183249	0.0572172	5.82638	85.1572	3.06265e-16	3.88667e-15	FBgn0031016	kek5
RS001822	0.613897	0.00394714	-0.135096	-0.200711	-0.126061	-0.14081	6.23868	85.1469	3.07774e-16	3.90264e-15	FBgn0022213	Cas
RS006398	-0.866905	-0.0575739	0.177489	-0.087842	-0.0111283	0.247025	5.75601	85.0993	3.1484e-16	3.989e-15	FBgn0034474	Obp56g
RS010477	1.31256	-0.425629	1.21651	0.785311	0.631356	0.930821	7.17564	85.0689	3.19437e-16	4.04395e-15	FBgn0039203	CG13618
RS008536	0.5354	-0.0557432	-0.114281	-0.0128374	-0.0197968	-0.0288036	5.98676	85.0327	3.24999e-16	4.11102e-15	FBgn0264492	CkIIalpha
RS013604	-0.941678	-0.0108097	0.0175804	-0.27346	-0.0340736	0.0308273	4.16961	85.0175	3.2737e-16	4.13765e-15	NA	NA
RS014190	-0.45031	0.0308395	-0.218997	-0.197136	-0.200682	0.0146047	8.59254	84.9314	3.41088e-16	4.30755e-15	FBgn0035438	PHGPx
RS003149	-1.08766	0.224175	-0.490916	-0.745775	-0.598616	0.0208267	3.58546	84.8392	3.56433e-16	4.4977e-15	FBgn0000473	Cyp6a2
RS004652	-0.743208	0.0360886	0.0778433	0.156184	0.104585	-0.0541808	4.5534	84.685	3.83627e-16	4.83693e-15	NA	NA
RS001420	-0.79263	0.0626922	-1.038	-1.55338	-1.40266	0.0230131	5.83432	84.4007	4.39333e-16	5.53481e-15	FBgn0031703	CG12512
RS011988	-0.685715	0.0371712	-0.0458617	-0.189731	-0.200563	0.00645783	5.90331	84.3803	4.43638e-16	5.58453e-15	FBgn0033807	AQP
RS014995	0.421937	-0.160099	-0.385549	-0.456799	-0.41912	0.0697884	5.45579	84.364	4.47089e-16	5.62343e-15	FBgn0027594	drpr
RS013881	-0.328513	-0.0394014	0.193917	0.251054	0.159357	0.11871	8.19103	84.2204	4.78783e-16	6.01723e-15	FBgn0031118	RhoGAP19D
RS003373	1.22979	0.224877	-1.25176	-1.10175	-0.577206	-0.454929	5.70286	84.2023	4.82941e-16	6.06459e-15	FBgn0032713	CG17323
RS012523	1.23916	0.383566	-0.586453	-0.273612	-0.101566	-0.500861	3.62754	84.1829	4.87408e-16	6.11575e-15	NA	NA
RS009068	-0.878056	-0.0252729	0.173167	-0.168496	-0.345404	0.0500152	4.59876	84.1218	5.01838e-16	6.29175e-15	FBgn0011747	Ank
RS012565	0.777785	0.0322269	-0.0955738	-0.172099	-0.0460145	-0.122378	5.40896	84.0924	5.08904e-16	6.3752e-15	FBgn0029999	CG1575
RS002419	-1.22746	-0.376557	-0.336712	-0.572846	-0.399493	0.548076	4.03886	84.0843	5.10879e-16	6.39481e-15	FBgn0259682	CG42351
RS000250	0.574558	0.0796218	-0.15934	-0.181338	-0.0637342	-0.105203	6.65103	83.9007	5.57612e-16	6.97417e-15	FBgn0024807	DIP1
RS005351	-0.405413	0.0251988	0.0956066	0.0134294	-0.00864612	-0.02687	6.94877	83.8937	5.59471e-16	6.99182e-15	FBgn0264574	Glut1
RS000895	0.748291	-0.093433	-0.0329187	0.0371326	-0.0477854	0.0472876	7.43943	83.7902	5.87772e-16	7.33961e-15	FBgn0011016	SsRbeta
RS014704	3.58913	0.516116	2.83385	2.72271	2.64228	-1.24206	2.41442	83.7874	5.8856e-16	7.34357e-15	FBgn0040342	CG3706
RS013330	2.52298	0.0610734	3.04141	1.67166	2.16016	-1.66511	0.563213	83.7497	5.9923e-16	7.47072e-15	FBgn0031412	CG16995
RS000906	0.906525	-0.143488	-0.774122	-0.633702	-0.45321	-0.221413	4.76994	83.6556	6.26726e-16	7.80728e-15	FBgn0034391	CG15080
RS006436	-1.20571	-0.0497578	0.45806	0.46136	0.602344	0.486297	4.6937	83.5898	6.46697e-16	8.04962e-15	FBgn0031213	galectin
RS009073	-0.975239	-0.00391675	0.152297	-0.19739	-0.0915815	0.190673	3.81804	83.4625	6.87131e-16	8.54608e-15	FBgn0030576	CG15890
RS003881	-0.344845	-0.0388229	-0.166191	-0.123303	-0.150942	0.107128	9.31126	83.4297	6.97969e-16	8.67396e-15	FBgn0022959	yps
RS000152	-0.574882	0.0182667	-0.0352534	0.164987	0.0415393	0.087779	6.14819	83.3479	7.25706e-16	9.01148e-15	FBgn0029896	CG3168
RS003869	0.373933	-0.0659051	-0.0317652	-0.0731893	-0.117574	0.0570718	7.29833	83.1988	7.79144e-16	9.66734e-15	FBgn0037728	CG16817
RS011397	-0.874086	0.0946007	0.0567365	0.181939	0.201473	0.139855	4.61934	82.9531	8.75952e-16	1.08598e-14	FBgn0011829	Ret
RS009828	0.406576	-0.0243451	-0.10379	-0.082176	-0.0126076	-0.0170699	6.99044	82.8194	9.3356e-16	1.15649e-14	FBgn0261243	Psa
RS014393	-0.640844	-0.12188	0.0736257	0.0789578	0.0511513	0.261295	5.8898	82.795	9.44467e-16	1.16907e-14	FBgn0034022	CG12964
RS006018	2.09878	-0.16052	1.58774	0.838871	0.96897	-0.735193	1.34844	82.6804	9.97485e-16	1.23371e-14	FBgn0033786	CG3884
RS012077	-0.906935	-0.304351	0.317445	0.228501	0.297865	0.513994	7.88235	82.6085	1.03224e-15	1.27568e-14	FBgn0035328	yellow-g2
RS004468	2.90952	-1.06365	0.25622	-0.181479	0.00801344	0.859649	0.841739	82.5979	1.03743e-15	1.28109e-14	NA	NA
RS011525	-0.539919	-0.0219376	0.0380455	-0.206276	-0.19406	0.171949	7.18836	82.5107	1.08143e-15	1.33436e-14	FBgn0015777	nrv2
RS013730	-0.860093	0.00494137	0.0697341	0.135621	-0.0368061	0.0970719	4.29989	82.5088	1.08242e-15	1.33453e-14	FBgn0085356	CG34327
RS013806	0.547816	0.0269335	-0.0122391	0.0424296	-0.0375616	0.0109368	5.71912	82.4952	1.08946e-15	1.34215e-14	FBgn0263133	ico
RS000784	0.581417	-0.0675129	-0.403116	-0.139492	-0.188032	-0.0427249	6.14038	82.4434	1.11668e-15	1.37459e-14	FBgn0038046	CG5641
RS003758	0.740517	-0.0777912	-0.00763288	-0.265336	-0.297011	-0.21691	4.89153	82.3871	1.14705e-15	1.41087e-14	FBgn0052499	Cda4
RS012338	-0.328163	0.0453381	0.0107304	0.0554448	0.0190634	-0.0269192	7.85437	82.3346	1.1761e-15	1.44545e-14	FBgn0003071	Pfk
RS000508	-0.538646	-0.136805	-0.0162805	-0.130305	-0.0894262	0.151194	7.13252	82.1742	1.26945e-15	1.55895e-14	NA	NA
RS015150	0.504288	0.0757825	-0.0375517	-0.0463323	0.00595384	-0.0745894	8.97216	82.1189	1.3033e-15	1.59926e-14	FBgn0010411	RpS18
RS014008	5.56774	0.615967	6.43464	6.124	5.94143	-1.94892	0.73718	81.9769	1.39451e-15	1.70983e-14	NA	NA
RS014238	-0.896461	-0.219513	0.0373347	-0.123294	-0.00534899	0.240031	5.42553	81.9746	1.39606e-15	1.71039e-14	FBgn0038126	CG8483
RS005202	0.768829	0.0781199	-0.585513	-0.0495262	-0.349248	-0.108146	4.77968	81.7528	1.55157e-15	1.89942e-14	FBgn0031777	CG9154
RS010869	0.65655	-0.0928636	0.201131	0.068119	0.047464	0.107293	7.31746	81.6765	1.6089e-15	1.96806e-14	FBgn0010470	Fkbp13
RS003997	-0.547586	-0.346995	0.348612	-0.0102076	-0.0319742	0.326986	6.444	81.6646	1.61805e-15	1.9777e-14	FBgn0053970	CG33970
RS005864	0.384592	-0.180802	0.128507	0.14514	0.0870127	0.217401	7.03196	81.6626	1.61963e-15	1.97808e-14	FBgn0002528	LanB2
RS011097	0.455573	-0.0801473	-0.141496	-0.0504814	-0.0594198	0.00763694	6.83806	81.6338	1.64198e-15	2.00381e-14	FBgn0004066	Pros28.1
RS001965	-0.76719	-0.141124	-0.061134	-0.0152519	-0.274086	0.0129344	4.77571	81.4282	1.81084e-15	2.20815e-14	FBgn0039084	CG10175
RS014028	-0.117816	0.034384	0.162366	-0.6532	0.292531	-0.00557049	6.09118	81.4117	1.82507e-15	2.22377e-14	FBgn0004406	tam
RS004936	-0.509772	-0.13944	-0.0204764	-0.113811	-0.152832	0.222072	6.96049	81.3399	1.88853e-15	2.29929e-14	FBgn0038149	CG9796
RS003393	0.693605	-0.0261988	-0.0303598	-0.109861	-0.127501	-0.0546428	7.58142	81.3081	1.91741e-15	2.33262e-14	FBgn0032721	CG10602
RS010297	-0.440986	-0.63329	-0.179345	-0.343576	-0.303435	0.413466	5.79501	81.1801	2.03784e-15	2.4772e-14	FBgn0032213	CG5390
RS011902	0.577054	0.0275735	-0.0986904	-0.00822445	0.111106	-0.0297383	6.53186	81.1722	2.04548e-15	2.48454e-14	FBgn0003275	RpII18
RS013424	-1.24284	-0.334607	0.0370985	-0.266663	-0.363044	0.492936	4.91828	81.1098	2.10714e-15	2.55745e-14	FBgn0031109	Obp19a
RS001361	5.88763	-0.226665	2.71011	2.4568	1.93102	-2.4766	5.5755	81.0353	2.18326e-15	2.64777e-14	FBgn0250815	Jon65Aiv
RS004070	5.77172	0.127179	5.46597	3.91027	4.64676	-0.933555	-0.22649	81.0318	2.18682e-15	2.65003e-14	FBgn0038420	CG10311
RS002116	0.7291	-0.012043	-0.329968	-0.313038	-0.233382	-0.0818005	6.32343	80.9645	2.25806e-15	2.73424e-14	FBgn0027537	CG11092
RS012618	1.23125	0.105395	-0.15723	-0.163633	0.141921	-0.396993	4.00743	80.9488	2.27499e-15	2.7526e-14	FBgn0011817	nmo
RS010644	0.356222	0.0122907	-0.176837	-0.127747	-0.107147	-0.0149816	8.02026	80.8738	2.35763e-15	2.85037e-14	FBgn0042134	Capr
RS003682	0.494076	0.0048481	0.0725525	0.141764	0.0692842	-0.0424808	6.08304	80.8408	2.39491e-15	2.8932e-14	FBgn0031078	CG11943
RS000285	-0.708627	0.0470133	-0.062959	0.0105561	-0.101021	0.0552257	5.03649	80.7239	2.53194e-15	3.05637e-14	FBgn0033644	Tret1-2
RS010621	-0.529849	-0.0331968	-0.20902	-0.11936	-0.240084	0.056904	6.9176	80.6976	2.56377e-15	3.0924e-14	FBgn0035811	CG12262
RS006695	-0.813548	-0.104785	0.220944	0.296626	-0.0194452	0.0784236	4.27955	80.6584	2.61206e-15	3.14821e-14	FBgn0259229	CG42329
RS012911	-0.778261	0.00284137	0.0411045	-0.053137	-0.127703	-0.0840079	6.48678	80.6562	2.61477e-15	3.14904e-14	FBgn0027601	pdgy
RS000624	-0.473718	0.142288	0.119964	0.147143	0.172664	-0.0180274	5.94725	80.6395	2.63573e-15	3.17183e-14	FBgn0263218	Dscam2
RS011768	-0.503513	-0.0401716	0.182761	0.229115	0.258364	0.00836774	6.76977	80.5676	2.72736e-15	3.27956e-14	NA	NA
RS014108	-1.05666	0.0335932	-0.247189	-0.690809	-0.501746	0.503924	10.1755	80.4718	2.85457e-15	3.42989e-14	NA	NA
RS009749	-0.477554	0.173186	-0.156097	-0.13954	-0.136899	0.0188272	6.5258	80.4583	2.87302e-15	3.4494e-14	FBgn0035936	Tsp66E
RS013507	0.600352	0.153679	-0.154905	-0.154044	-0.0954779	-0.128814	8.82294	80.385	2.97491e-15	3.56898e-14	FBgn0002593	RpLP1
RS000858	0.217397	-0.00326035	0.0937353	0.294955	0.395737	-0.0368683	8.26476	80.3787	2.98386e-15	3.57695e-14	FBgn0011284	RpS4
RS009435	5.80109	0.105926	5.38303	4.17934	4.48673	-1.09825	-0.227992	80.3679	2.9993e-15	3.5927e-14	FBgn0003410	sina
RS007032	-0.894375	-0.0797644	0.126001	0.147745	-0.0414155	0.133236	5.11074	80.2949	3.10525e-15	3.71676e-14	FBgn0028699	Rh50
RS005308	-1.24745	0.12737	0.0858746	0.322818	0.0223043	-0.0637546	2.71804	80.1873	3.2683e-15	3.90892e-14	FBgn0040370	CG13375
RS001512	-0.384129	0.0452313	0.0573963	-0.0138668	0.0249436	0.000399168	8.92832	80.173	3.2907e-15	3.93269e-14	FBgn0028371	jbug
RS009874	0.859189	0.0274185	-0.0892916	-0.175462	-0.0724495	-0.111696	4.93715	80.108	3.39395e-15	4.05298e-14	FBgn0037723	SpdS
RS012984	-0.290996	0.142442	0.269609	0.1043	0.081195	-0.0377637	8.13662	80.0964	3.41273e-15	4.07228e-14	NA	NA
RS011010	-0.699054	-0.134331	0.35565	0.247289	0.219503	0.197329	6.12661	80.0224	3.53496e-15	4.21491e-14	FBgn0013718	nuf
RS004283	-0.50968	0.0720592	0.781441	0.503622	0.390327	-0.235953	6.78727	80.0063	3.56215e-15	4.2426e-14	FBgn0053978	CG33978
RS005748	0.683341	-0.0677073	-0.0333192	0.0302177	0.132222	0.0471097	5.04874	80.0054	3.56363e-15	4.2426e-14	FBgn0037899	RpL24-like
RS003825	-0.0719715	-0.048786	-0.396072	-0.437093	-0.499364	0.0585121	8.45696	79.9557	3.64887e-15	4.34076e-14	FBgn0033755	ClC-b
RS010707	1.80965	0.280722	0.630732	0.750046	1.21482	-0.399761	2.04281	79.932	3.69039e-15	4.38681e-14	NA	NA
RS002548	-0.958312	-0.392026	0.428226	0.406614	0.258884	0.236257	4.46233	79.8826	3.77812e-15	4.48767e-14	FBgn0010435	emp
RS010413	-2.05379	-0.161802	1.71872	1.68079	1.06701	0.670428	1.28129	79.7574	4.00981e-15	4.75925e-14	NA	NA
RS009844	-0.673321	0.130559	0.140294	-0.0528613	-0.0198245	-0.0369291	4.63518	79.6968	4.12698e-15	4.89459e-14	FBgn0040232	cmet
RS006968	-1.0014	-0.207921	-0.728456	-0.0312592	-0.354665	0.283283	3.60541	79.6913	4.13785e-15	4.90234e-14	NA	NA
RS005979	0.506807	-0.0110515	-0.132925	-0.0264153	-0.215086	0.0374461	8.33386	79.6903	4.13981e-15	4.90234e-14	FBgn0014455	Ahcy13
RS001248	-1.07383	-0.161325	0.521304	0.518992	0.358112	0.207007	4.76462	79.6587	4.20245e-15	4.97274e-14	FBgn0032405	CG14946
RS001110	0.729265	0.00152246	-0.028483	0.0650669	-0.0487574	-0.172416	5.88069	79.6082	4.30474e-15	5.08992e-14	NA	NA
RS012321	-0.534102	-0.0559731	0.049471	-0.093777	-0.175893	0.0509165	7.20254	79.4482	4.64493e-15	5.48799e-14	FBgn0027508	tankyrase
RS007499	4.67527	0.736979	3.81824	3.67371	3.26024	-2.31429	1.86123	79.3989	4.75509e-15	5.61389e-14	FBgn0037065	CG12974
RS003706	-0.372978	0.033388	-0.255803	-0.341736	-0.27201	-0.0400218	7.30352	79.3433	4.88237e-15	5.7598e-14	FBgn0027111	miple
RS010061	4.79721	2.37965	-0.475789	-1.72573	0.597717	-3.00796	0.509101	79.2484	5.10775e-15	6.02111e-14	FBgn0036678	CG11905
RS013850	-0.633124	-0.115047	0.0129729	-0.107521	-0.254803	0.250226	9.36635	79.2461	5.11329e-15	6.02309e-14	FBgn0052702	CG32702
RS002521	0.805474	-0.0249381	-0.16147	-0.3966	-0.407201	0.213174	9.05875	79.2339	5.14314e-15	6.05368e-14	FBgn0263830	CG40486
RS002637	-0.616541	-0.221973	-0.214157	-0.206877	-0.180543	0.349821	7.15535	79.204	5.21682e-15	6.13576e-14	FBgn0063923	Kaz1-ORFB
RS002966	1.96434	0.232194	0.268494	0.220402	-0.0037692	-0.24385	1.94025	79.1936	5.24249e-15	6.16131e-14	FBgn0038511	CG5873
RS010954	-0.471975	0.042693	0.0491538	-0.00947716	0.00803524	0.103644	7.89375	79.0798	5.53408e-15	6.4991e-14	FBgn0027608	CG2082
RS012376	-0.424191	0.00716628	-0.0950814	-0.0314475	-0.0668516	0.0269851	10.001	79.0614	5.58269e-15	6.55125e-14	FBgn0034497	CG9090
RS013762	-1.13743	-0.457152	0.582328	-0.73958	-0.293361	0.609515	4.38171	78.9966	5.75735e-15	6.75103e-14	FBgn0039298	to
RS008606	-1.38872	0.0391221	-0.185463	-0.00598216	-0.127755	0.0697742	4.24635	78.995	5.7616e-15	6.75103e-14	NA	NA
RS001077	1.54612	0.0969217	0.404749	0.0461166	0.241373	-0.344496	3.80769	78.9799	5.80304e-15	6.79448e-14	NA	NA
RS004791	-0.397497	0.0108432	0.34343	0.282562	0.260555	-0.128439	8.40162	78.9254	5.9553e-15	6.96752e-14	FBgn0034089	CG8446
RS003333	0.664473	-0.0740175	-0.207666	-0.0498227	-0.133463	0.0414388	5.55368	78.8624	6.13643e-15	7.17405e-14	FBgn0037439	CG10286
RS001704	-1.1874	-0.320561	0.488536	0.651928	0.36383	0.594534	3.47108	78.8446	6.18867e-15	7.2297e-14	NA	NA
RS001230	1.11667	0.127411	-0.297973	0.137949	0.229009	0.0406036	3.54733	78.827	6.24047e-15	7.28476e-14	FBgn0031040	CG14210
RS006594	0.186824	0.27662	-1.42453	-1.20329	-1.39222	-0.421867	2.70547	78.7056	6.6111e-15	7.71163e-14	FBgn0039939	CG11231
RS013238	-1.50649	0.236911	0.51842	0.704141	0.405114	0.772182	2.54841	78.5035	7.27775e-15	8.4829e-14	NA	NA
RS005077	-0.883651	0.0769436	0.140131	-0.0735045	-0.0619958	0.0768606	4.52987	78.4854	7.34036e-15	8.54949e-14	FBgn0037895	CG6723
RS005509	0.552307	-0.010121	-0.526593	-0.211479	-0.176878	-0.122579	5.79347	78.4675	7.4031e-15	8.61613e-14	FBgn0029512	Aos1
RS008312	0.392753	-0.0195301	-0.415596	-0.29742	-0.102889	-0.0564988	5.87118	78.4638	7.41622e-15	8.62496e-14	FBgn0032620	CG12288
RS007399	-1.07139	0.0884175	0.327364	0.0437113	0.256912	0.0372551	3.22497	78.3997	7.64571e-15	8.88521e-14	FBgn0039478	Nep5
RS013210	-0.294562	0.177466	0.139972	-0.0115692	0.168447	-0.0408214	7.19577	78.3868	7.69262e-15	8.93306e-14	NA	NA
RS013334	-0.741387	0.160372	0.112732	-0.0440776	-0.0472585	-0.0798289	4.53731	78.2784	8.09904e-15	9.39802e-14	FBgn0259935	CG42458
RS006851	-0.608134	-0.187865	0.110956	0.0826032	-0.0267227	0.268282	7.80897	78.254	8.19343e-15	9.50048e-14	FBgn0010575	sbb
RS012751	-0.349071	0.0339748	-0.0325559	-0.0518631	-0.102125	-0.176643	6.62652	78.2275	8.29748e-15	9.61398e-14	FBgn0000273	Pka-C1
RS015221	-0.904006	-0.152121	0.375618	0.20575	0.249742	0.441421	6.74435	78.1198	8.73291e-15	1.0111e-13	FBgn0033978	Cyp6a23
RS008484	0.585473	-0.16	0.085706	-0.0554995	-0.0111206	0.0100338	5.7342	78.0881	8.8653e-15	1.02566e-13	FBgn0262743	Fs(2)Ket
RS013684	-0.444803	0.0959692	0.421169	0.442684	0.503516	-0.051828	5.25896	78.0297	9.11475e-15	1.05374e-13	FBgn0028509	cenG1A
RS007549	-0.347567	0.287944	-0.361117	0.117694	0.251624	-0.232906	5.71687	77.9985	9.25111e-15	1.06871e-13	FBgn0052225	CG32225
RS012524	1.08035	0.27825	-0.660712	-0.417026	-0.307388	-0.470921	5.06164	77.9821	9.32312e-15	1.07623e-13	FBgn0052066	CG32066
RS000485	0.704455	-0.162974	0.0625989	0.0578377	-0.226304	0.150614	9.30892	77.9412	9.50618e-15	1.09655e-13	FBgn0023477	Tal
RS012755	0.00710175	-0.0168951	-0.315463	-0.398593	-0.409747	0.0197441	8.85504	77.9289	9.56208e-15	1.10218e-13	FBgn0029093	cathD
RS003504	0.425708	0.00546892	-0.373994	-0.286014	-0.289813	-0.0157039	10.5362	77.8468	9.94192e-15	1.14512e-13	FBgn0003887	betaTub56D
RS013172	0.576366	-0.155831	0.178599	0.114875	0.235496	0.0524879	5.33546	77.8331	1.00069e-14	1.15176e-13	FBgn0038321	CG6218
RS005246	0.676991	-0.0464127	0.242006	0.623762	0.327068	0.210836	4.59093	77.7837	1.02445e-14	1.17823e-13	FBgn0038641	CG7708
RS001265	0.41683	-0.207131	-0.480633	-0.189113	-0.0170376	0.143233	6.21881	77.709	1.06147e-14	1.21991e-13	FBgn0038986	CG5278
RS001006	-0.775881	-0.178485	0.592204	0.540435	0.255583	0.44511	5.52971	77.6916	1.07025e-14	1.2291e-13	FBgn0029762	NAAT1
RS001179	0.564804	-0.0948351	0.168455	0.1711	0.0973742	0.132863	5.65672	77.5531	1.14305e-14	1.31173e-13	FBgn0039868	CG11563
RS011906	0.499699	-0.155236	-0.0478125	-0.25413	-0.142674	0.0759907	5.29765	77.4394	1.20646e-14	1.38348e-13	FBgn0030309	CG1572
RS000846	2.0263	-0.0313258	-1.9809	-1.62361	-2.06453	0.127847	13.9228	77.4319	1.21076e-14	1.38738e-13	FBgn0002565	Lsp2
RS015207	-0.655822	0.0488004	-0.212726	-0.0401022	-0.162015	0.0447883	5.65645	77.3451	1.26167e-14	1.44466e-13	NA	NA
RS010208	3.22274	0.113098	0.755069	-0.216221	-0.136221	-0.852735	0.737443	77.3088	1.2836e-14	1.46869e-13	FBgn0086687	desat1
RS002175	-0.387739	0.0248231	-0.84569	-1.08438	-0.992568	-0.0638373	3.71804	77.2989	1.28965e-14	1.47454e-13	NA	NA
RS001766	6.75591	2.16791	3.31524	3.46714	2.12388	-4.08378	1.71476	77.2959	1.29151e-14	1.47558e-13	FBgn0261788	Ank2
RS014281	-0.990714	-0.184672	-0.0188685	-0.364743	-0.315833	0.0178004	6.73188	77.2769	1.30323e-14	1.48788e-13	FBgn0039805	Cpr100A
RS013225	0.524325	0.059259	-0.196296	-0.0794637	-0.0882136	-0.0388599	8.29828	77.2192	1.33943e-14	1.52808e-13	FBgn0261593	RpS10b
RS011770	-0.548663	-0.0760387	0.207816	0.12903	0.0688965	0.136352	6.47144	77.1181	1.40525e-14	1.60201e-13	FBgn0050147	Hil
RS005209	-0.772242	-0.163595	0.0393468	-0.117919	-0.0784085	0.30062	6.46979	77.0611	1.44378e-14	1.64472e-13	FBgn0010241	Mdr50
RS010993	1.10923	-0.108563	-0.43861	-0.356231	-0.254883	-0.139119	5.19581	77.0542	1.44855e-14	1.64896e-13	FBgn0262029	d
RS007419	-0.35816	0.0357976	-0.217446	-0.175373	-0.217789	0.0363353	7.56311	76.9929	1.49133e-14	1.69641e-13	FBgn0027291	l(1)G0156
RS006164	0.103907	0.243883	-2.82917	-1.20785	-1.9835	-0.546648	1.23398	76.8573	1.59046e-14	1.80704e-13	NA	NA
RS011340	-0.371971	-0.18379	-0.603127	-0.148922	-1.26288	-0.199862	4.17198	76.8545	1.5926e-14	1.80704e-13	FBgn0086347	Myo31DF
RS012446	-0.664369	0.164175	-0.119001	0.0324785	-0.202827	0.0423486	5.22368	76.8536	1.59322e-14	1.80704e-13	FBgn0038788	Sirt2
RS002551	0.735496	-0.00987533	0.136113	-0.0177716	0.0487205	0.0823961	5.05409	76.8536	1.59322e-14	1.80704e-13	FBgn0000250	cact
RS006922	-0.851751	-0.149577	-0.0810908	-0.50372	-0.255912	-0.0245168	3.75365	76.8165	1.62153e-14	1.83781e-13	FBgn0023095	caps
RS010343	-1.23133	-0.0606719	-0.0373332	0.0224785	-0.0199232	0.248683	3.16596	76.7849	1.64604e-14	1.86423e-13	FBgn0037323	CG2663
RS003314	0.702511	0.0756928	-0.0250922	0.0524892	-0.0440048	-0.093298	6.38719	76.7488	1.67455e-14	1.89515e-13	FBgn0016726	RpL29
RS000135	-0.821816	-0.312871	0.230643	0.720679	0.324076	0.497225	4.59708	76.7373	1.68369e-14	1.90411e-13	FBgn0038309	CG6499
RS002000	-1.06912	-0.230799	0.0912589	-0.0573546	-0.35547	0.492075	7.84794	76.7174	1.69964e-14	1.92075e-13	FBgn0035077	CG9083
RS011169	0.808034	0.172151	-0.137689	-0.161529	-0.223898	-0.302134	5.51116	76.6048	1.79292e-14	2.0247e-13	FBgn0262735	Imp
RS007590	-0.685515	0.0759079	-0.447259	-0.71645	-0.820265	0.227443	11.0847	76.5716	1.82138e-14	2.05535e-13	FBgn0038126	CG8483
RS005775	-0.616073	0.00683124	0.133022	0.0636678	0.244251	0.131662	5.7269	76.5427	1.84654e-14	2.08223e-13	NA	NA
RS000609	-0.405543	0.133452	0.0535344	0.115884	0.163882	-0.0849922	7.62226	76.4576	1.92271e-14	2.16656e-13	FBgn0001991	Ca-alpha1D
RS015229	0.916392	-0.0711528	0.588426	0.39803	0.309042	0.348482	5.36864	76.4171	1.95998e-14	2.20696e-13	FBgn0051145	CG31145
RS011714	4.23236	-0.278064	2.87927	2.59622	2.69464	-0.665379	2.41267	76.3403	2.03268e-14	2.28716e-13	FBgn0001112	Gld
RS006499	-0.997898	0.216944	-0.995931	-0.927183	-1.07437	0.0259401	2.49681	76.3256	2.04698e-14	2.3016e-13	FBgn0036414	nan
RS000945	-0.955244	-0.119328	0.450098	0.446293	0.623034	-0.164792	3.15221	76.1599	2.21435e-14	2.48799e-13	FBgn0033216	CG1946
RS001967	2.4618	0.380313	4.24909	2.9775	2.87781	-1.27317	2.40385	76.1089	2.26856e-14	2.54706e-13	FBgn0039084	CG10175
RS003176	0.663117	0.00113219	-0.151537	-0.0466746	-0.0112352	-0.069293	5.237	76.0658	2.3155e-14	2.59789e-13	FBgn0027334	l(1)G0004
RS002074	0.511685	0.0195352	-0.0411249	-0.0716255	-0.045303	-0.0293018	6.50808	76.0256	2.36003e-14	2.64595e-13	FBgn0002031	l(2)37Cc
RS001264	3.03264	1.5502	-0.0831754	0.071063	0.318392	-1.74775	1.58271	76.0074	2.38051e-14	2.66699e-13	FBgn0038986	CG5278
RS013505	0.552538	-0.130475	-0.0332308	-0.0256606	-0.0532852	0.00850622	5.98803	75.9188	2.48264e-14	2.77942e-13	FBgn0010292	bys
RS000644	-1.24024	0.151339	-0.717967	-0.403294	-0.384147	0.148035	3.10575	75.9106	2.49238e-14	2.78832e-13	NA	NA
RS003098	-0.882453	-0.134008	0.349286	-0.229099	-0.14673	-0.0872332	5.47378	75.815	2.60796e-14	2.91552e-13	FBgn0040601	CG13643
RS003506	1.38513	-0.114112	-0.362762	-0.0132546	-0.102029	-0.0251945	6.86603	75.7325	2.71212e-14	3.0298e-13	FBgn0003888	betaTub60D
RS011909	-2.96869	0.181086	-1.27607	-1.26358	-0.83683	0.586061	0.680809	75.7126	2.73774e-14	3.05622e-13	FBgn0051720	CG31720
RS007874	0.585105	0.11402	0.107852	0.0674591	0.0253638	-0.193182	6.89305	75.6741	2.78829e-14	3.11043e-13	FBgn0032198	eEF1delta
RS006871	-0.714368	-0.350267	-0.0510507	0.34185	0.0343909	0.0493849	4.45763	75.6426	2.83024e-14	3.15497e-13	FBgn0086687	desat1
RS005645	-0.571333	0.011358	-0.0217116	-0.0282679	-0.0813343	0.206588	7.84262	75.5778	2.91847e-14	3.251e-13	FBgn0031037	CG14207
RS009578	-0.955536	-0.32667	0.689264	0.383602	0.545359	-0.0385398	3.92806	75.5457	2.96325e-14	3.29852e-13	FBgn0025709	CG8083
RS010419	-0.817942	-0.258543	0.0434581	-0.225594	-0.272562	0.347186	6.40869	75.4898	3.04294e-14	3.38481e-13	NA	NA
RS004054	-0.67919	-0.0818609	0.369403	0.422166	0.296077	0.244192	5.17252	75.4789	3.05862e-14	3.39983e-13	FBgn0039048	CG17111
RS009300	-0.76926	0.0498735	0.0700422	-0.105913	-0.0032593	-0.167921	4.3381	75.4472	3.10496e-14	3.44887e-13	FBgn0063649	CG6006
RS009359	1.10725	0.161786	0.0509077	-0.0503399	0.0277995	-0.389648	4.12905	75.347	3.25601e-14	3.61167e-13	FBgn0036691	beg
RS004117	-0.62356	0.0272626	0.239722	0.435741	0.265483	0.0549823	5.28184	75.3469	3.25616e-14	3.61167e-13	FBgn0029723	Proc-R
RS002884	-0.382747	-0.0421196	0.00126449	0.0186478	0.0301429	0.0284671	7.19412	75.3231	3.29313e-14	3.65008e-13	FBgn0038296	CG6752
RS008358	0.412422	0.00617304	-0.240917	-0.301317	-0.146481	-0.0981072	6.99471	75.2959	3.33599e-14	3.69496e-13	FBgn0029174	FKBP59
RS013851	1.56968	0.348327	0.567556	0.519046	0.78391	-0.48432	2.97447	75.2814	3.359e-14	3.7178e-13	FBgn0031273	CG2839
RS010671	-0.408291	0.0122202	0.196413	0.0608731	0.119076	0.0393702	9.86002	75.2677	3.38082e-14	3.7393e-13	FBgn0053087	LRP1
RS015048	-0.412278	0.0708913	0.303952	0.26327	0.277622	0.0775245	11.6198	75.1466	3.58068e-14	3.95754e-13	FBgn0013733	shot
RS011038	0.705176	-0.34006	-0.164306	-0.185564	-0.298191	0.536348	3.84637	75.0952	3.66898e-14	4.05226e-13	NA	NA
RS001872	1.19909	0.162645	-0.287769	-0.353627	-0.213943	-0.197868	5.10967	75.0729	3.70797e-14	4.09243e-13	FBgn0053817	His2A:CG33817
RS001407	-0.623022	-0.0426889	-0.238919	-0.29747	-0.400209	-0.0719401	6.16155	74.9544	3.92221e-14	4.32581e-13	FBgn0051248	CG31248
RS004439	4.62521	-0.118822	2.22224	1.96365	2.82763	-0.119002	1.03592	74.9213	3.98418e-14	4.39105e-13	NA	NA
RS011826	-0.647946	-0.111942	0.0607707	0.0544574	0.0938046	0.191535	6.85467	74.9001	4.02449e-14	4.43234e-13	FBgn0261261	plx
RS006528	0.654819	-0.26013	0.156557	0.114034	0.17792	0.578842	3.95947	74.8945	4.03522e-14	4.44102e-13	FBgn0028544	CG16884
RS010715	-0.382095	0.0620517	0.0617296	0.00171535	-0.0631249	0.00989176	7.41204	74.8583	4.10495e-14	4.51458e-13	FBgn0051140	CG31140
RS002196	0.571799	-0.104437	-0.0402311	-0.0729515	0.131574	-0.0509372	5.77794	74.8519	4.11756e-14	4.52525e-13	FBgn0025683	CG3164
RS001189	-0.182162	0.097544	0.155082	0.174161	0.263794	-0.0964315	8.66624	74.8257	4.16891e-14	4.57846e-13	NA	NA
RS000744	1.00624	-0.0717354	-0.335704	0.0542151	-0.290479	-0.0654312	3.45058	74.805	4.21004e-14	4.62037e-13	FBgn0030291	CG1738
RS011173	-0.499569	0.0402872	0.0987318	0.109628	-0.00392769	-0.0680979	6.89319	74.8018	4.21631e-14	4.624e-13	FBgn0037973	CG18547
RS013243	-0.388905	0.00205818	0.26091	0.233762	0.167343	0.100726	6.78463	74.7776	4.26506e-14	4.67417e-13	FBgn0053653	Caps
RS001813	-0.603777	-0.0470568	0.114423	0.285075	0.160807	0.151836	5.51231	74.7579	4.30507e-14	4.71384e-13	FBgn0085377	CG34348
RS007445	0.207714	-0.0416026	-0.33598	-0.32496	-0.278312	0.121061	8.07233	74.7568	4.30731e-14	4.71384e-13	FBgn0027611	CG6206
RS011174	-0.2601	0.0482825	0.196233	0.424961	0.151066	-0.0166872	6.90508	74.5952	4.6501e-14	5.08541e-13	FBgn0032032	CG17294
RS014291	-0.669893	0.0718871	-0.22216	-0.026806	-0.434845	0.0267531	8.08352	74.543	4.76657e-14	5.20913e-13	FBgn0033753	Cyp301a1
RS006026	0.396574	-0.030405	-0.0704009	0.0115124	-0.126814	-0.0508741	6.73258	74.4857	4.89777e-14	5.34877e-13	FBgn0035402	CG12082
RS011356	0.893952	0.223127	-0.219332	-0.260178	-0.121181	-0.302353	4.55214	74.4111	5.07412e-14	5.53747e-13	NA	NA
RS003591	-1.15298	-0.0830947	-0.38892	-0.378068	-0.467048	0.343377	3.74584	74.3415	5.24428e-14	5.71916e-13	FBgn0034474	Obp56g
RS015133	0.550841	0.0762513	-0.0794439	-0.0709341	-0.0581479	-0.13168	6.7831	74.3222	5.29247e-14	5.76768e-13	FBgn0263740	eIF-2gamma
RS004599	-1.04292	-0.01432	0.558122	0.227856	0.241675	-0.220263	3.62058	74.3087	5.32626e-14	5.80045e-13	FBgn0036288	CG10660
RS006400	0.921593	0.0231837	-0.215105	-0.120118	0.0668657	-0.257127	4.08476	74.2471	5.484e-14	5.96806e-13	FBgn0039175	CG5706
RS001522	0.534515	-0.155669	0.113997	0.0162012	0.00642589	0.147837	5.51512	74.1476	5.74879e-14	6.25186e-13	FBgn0037718	P58IPK
RS001454	0.795639	-0.031337	0.306228	0.0947979	-0.13461	-0.0236296	4.79077	74.0218	6.10182e-14	6.63115e-13	FBgn0010803	Aats-trp
RS013480	6.35269	-0.23428	0.530466	-0.239809	1.45271	-0.205744	5.57742	73.9945	6.18126e-14	6.71281e-13	FBgn0037288	CG14661
RS004518	-0.581161	-0.0492849	0.0310617	-0.0021538	-0.0206314	-0.0591694	5.83716	73.9118	6.42812e-14	6.97604e-13	FBgn0036165	chrb
RS003712	0.737562	-0.0415327	-0.126011	-0.089541	-0.135171	0.0896609	4.5234	73.9051	6.44859e-14	6.99337e-13	FBgn0029906	CG4542
RS009124	-0.227066	0.171157	-0.575337	-1.07202	-1.09636	0.150344	6.8745	73.9012	6.46066e-14	7.00159e-13	FBgn0038257	smp-30
RS012754	0.393697	-0.125103	-0.52745	-0.477306	-0.462751	0.0659957	7.15189	73.893	6.48553e-14	7.02366e-13	FBgn0029093	cathD
RS003335	0.608445	0.142196	0.313759	0.137736	0.364251	0.125142	9.57586	73.879	6.52877e-14	7.06558e-13	FBgn0032136	CG15828
RS009610	-1.57374	-0.281857	0.344157	-0.38947	-0.352873	0.772942	3.01875	73.8393	6.65289e-14	7.19491e-13	NA	NA
RS009669	3.11943	0.607848	2.71477	2.10588	1.82983	-1.41123	2.08955	73.6745	7.19272e-14	7.77333e-13	NA	NA
RS012047	-0.46231	0.139999	0.363564	0.314202	0.22527	-0.238714	5.52427	73.672	7.20125e-14	7.77715e-13	FBgn0039736	CG7912
RS013791	-0.792759	-0.000739251	0.24462	0.225007	0.251037	0.074542	5.63559	73.6321	7.33864e-14	7.92003e-13	FBgn0020240	Mcr
RS006953	-0.788683	-0.0873598	0.34641	-0.289627	-0.245694	0.210541	9.3595	73.5462	7.64351e-14	8.24336e-13	FBgn0034364	CG5493
RS012254	1.17641	0.0602215	-0.957415	-0.880113	-0.643219	-0.317321	2.90841	73.5076	7.78424e-14	8.38795e-13	FBgn0031619	CG3355
RS007227	0.747957	-0.118428	-0.134715	-0.0495138	-0.231023	-0.0502784	4.57751	73.5065	7.78835e-14	8.38795e-13	FBgn0030066	CG1885
RS013189	-1.29935	-0.141908	-0.0782438	0.290297	-0.063861	0.508703	3.94036	73.4933	7.8372e-14	8.43362e-13	FBgn0036768	CG7402
RS002480	0.475342	-0.031278	-0.226261	-0.250601	-0.208543	0.00528186	5.64808	73.4921	7.84158e-14	8.43362e-13	FBgn0034310	Nup75
RS014710	0.25542	-0.109377	0.0344324	-0.00251327	-0.0308629	0.0958138	7.95266	73.4345	8.05847e-14	8.6609e-13	FBgn0025725	alphaCop
RS010927	1.03548	0.0445329	0.0741979	-0.043431	0.0563015	-0.217017	3.83547	73.4314	8.07031e-14	8.66765e-13	FBgn0031252	CG13690
RS000585	-1.14796	-0.349256	0.312796	0.239713	0.109084	0.580868	5.22851	73.4031	8.17937e-14	8.77874e-13	FBgn0011695	PebIII
RS003153	-1.01344	-0.162301	-0.480084	-0.200488	0.0867692	-0.240963	4.69581	73.3715	8.30263e-14	8.9049e-13	FBgn0013773	Cyp6a22
RS014748	-0.427768	0.0252015	0.104291	0.136656	0.0668512	0.0702801	7.86556	73.3662	8.32327e-14	8.92089e-13	FBgn0039908	Asator
RS009753	-0.955757	-0.0510048	0.443047	-0.0330994	0.0157744	0.209972	5.27412	73.2954	8.60714e-14	9.21881e-13	FBgn0011695	PebIII
RS003858	0.491725	-0.0340082	-0.180633	-0.127233	0.0639347	0.210346	5.04188	73.2117	8.95528e-14	9.5851e-13	FBgn0015777	nrv2
RS001972	-2.19733	-0.297025	-0.69496	-0.669947	-0.93731	0.657863	1.4176	73.1018	9.43339e-14	1.00899e-12	FBgn0039203	CG13618
RS006631	0.452637	0.168332	-0.175634	-0.209286	-0.060328	-0.159004	7.70901	73.0054	9.87371e-14	1.05536e-12	FBgn0014189	Hel25E
RS001433	4.10712	0.123404	2.24416	1.66368	1.23547	-1.56381	4.04216	72.9986	9.90557e-14	1.05804e-12	FBgn0024320	Npc1a
RS012598	-0.562902	0.0650247	0.00414049	0.15063	0.15557	0.152229	8.01725	72.9502	1.01351e-13	1.08182e-12	FBgn0013988	Strn-Mlck
RS013209	0.469281	-0.152854	0.080074	0.099073	0.0818148	0.472658	6.60534	72.926	1.02518e-13	1.09353e-12	FBgn0038652	CG7720
RS007418	0.501497	-0.0638985	0.200454	0.128798	0.035982	0.246995	5.30194	72.7872	1.09479e-13	1.16697e-12	FBgn0085423	CG34394
RS014217	0.563666	0.0678189	-0.205316	-0.364895	-0.333345	-0.0770342	7.53164	72.6674	1.15864e-13	1.23419e-12	FBgn0016687	Nurf-38
RS014517	0.634426	0.0153805	-0.0283342	-0.070055	0.0114918	-0.0863773	5.50551	72.6104	1.19037e-13	1.26712e-12	FBgn0032358	Ppt2
RS014817	0.446033	0.0474658	1.4937	0.748154	1.14877	-0.361833	3.54094	72.5113	1.24748e-13	1.32701e-12	NA	NA
RS008660	-0.536348	-0.00795783	-0.143053	-0.189737	-0.333035	-0.0129612	9.36154	72.4838	1.26381e-13	1.34346e-12	FBgn0034618	CG9485
RS014415	-0.545316	-0.0337365	0.109564	0.180023	0.0832421	-0.0521365	7.00246	72.4727	1.2705e-13	1.34966e-12	FBgn0261788	Ank2
RS008519	0.489881	0.0737678	-0.084728	0.0348141	0.00524794	0.0399496	6.47432	72.4682	1.27319e-13	1.35159e-12	FBgn0003062	Fib
RS006394	4.51575	-0.107665	3.57832	3.04916	3.04503	-1.03541	1.6541	72.3212	1.36493e-13	1.448e-12	FBgn0053966	CG33966
RS002200	1.0028	-0.178361	0.634933	0.523138	0.350096	-0.232903	5.12661	72.3106	1.37178e-13	1.45428e-12	FBgn0032167	CG5853
RS001996	5.77129	1.68849	4.89422	3.24539	4.92832	-3.33769	-0.309988	72.292	1.38391e-13	1.46614e-12	FBgn0036689	CG7730
RS014702	0.349463	-0.0342587	-0.171707	-0.24824	-0.504536	0.00954178	6.80782	72.242	1.41698e-13	1.50015e-12	FBgn0031824	CG9547
RS012032	1.20745	0.143628	-0.120959	-0.605937	-0.194814	-0.251536	3.0658	72.1861	1.45498e-13	1.53934e-12	FBgn0031875	CG3430
RS001884	0.461493	-0.12376	-0.0416849	-0.284173	-0.27388	0.0188547	5.97559	72.1622	1.47153e-13	1.55578e-12	FBgn0025697	santa-maria
RS012760	-0.408099	0.0925987	0.0754268	0.231359	0.186463	-0.253183	5.2155	72.1581	1.4744e-13	1.55777e-12	FBgn0038839	CG10830
RS010551	-0.366644	-0.0207882	0.105388	0.133529	-0.0767121	0.00995663	6.7285	72.1369	1.48925e-13	1.57239e-12	FBgn0031589	CG3714
RS008051	-0.932068	-0.134705	-0.0737409	-0.248313	-0.142909	0.209043	4.92103	72.0172	1.57598e-13	1.66283e-12	FBgn0260005	wtrw
RS010276	-0.419017	-0.112576	0.0956931	0.0840771	0.0630861	0.13398	6.67612	72.008	1.5829e-13	1.66901e-12	FBgn0036318	Wbp2
RS014450	0.288658	-0.0200884	-0.38554	-0.413274	-0.394764	0.00637554	8.03418	71.8995	1.66625e-13	1.7557e-12	FBgn0004587	B52
RS006613	0.514705	-0.0953125	-0.404298	-0.272355	-0.250435	-0.00915418	5.95435	71.8837	1.67869e-13	1.76761e-12	FBgn0037305	CG12173
RS008858	-0.631912	-0.0363574	0.090861	0.140309	-0.0748399	0.107002	5.67303	71.8185	1.73132e-13	1.82181e-12	FBgn0031065	CG14234
RS010298	-0.595961	-0.27201	0.195754	0.37833	0.165264	0.254277	6.99914	71.7827	1.76083e-13	1.85161e-12	FBgn0032213	CG5390
RS002288	0.978748	0.0342816	-0.636746	-0.314249	-0.42954	-0.36579	5.15736	71.7388	1.79775e-13	1.88915e-12	FBgn0016047	nompA
RS008019	0.48169	0.0681349	-0.237214	-0.105572	-0.115682	-0.130061	5.81352	71.6925	1.83755e-13	1.92967e-12	FBgn0026430	Grip84
RS007256	0.687723	0.0279614	-0.110985	-0.0338333	-0.126741	-0.149526	5.32921	71.6779	1.85033e-13	1.94178e-12	FBgn0037061	CG12975
RS012315	0.960959	-0.279575	-0.466168	-0.589529	-0.229243	-0.126925	4.7143	71.611	1.90976e-13	2.00281e-12	FBgn0041629	Hexo2
RS008191	-1.30921	-0.331351	0.584081	0.311398	0.224752	0.510148	3.84947	71.5923	1.92678e-13	2.0193e-12	FBgn0052082	CG32082
RS001630	0.604661	-0.171044	-0.138307	-0.232855	-0.0534596	0.153612	4.55913	71.4671	2.04423e-13	2.14095e-12	FBgn0030678	CG11679
RS000374	-0.742686	-0.16363	-0.00332315	0.0765838	-0.18016	0.177583	5.73396	71.4547	2.05631e-13	2.15215e-12	FBgn0036203	Muc68D
RS009330	1.05456	0.0664683	-0.859227	-0.401155	-0.410027	-0.239624	2.97274	71.4007	2.10948e-13	2.20632e-12	NA	NA
RS004865	0.305321	-0.102679	-0.184638	-0.00986525	-0.0306879	0.0432564	6.90521	71.383	2.12716e-13	2.22331e-12	FBgn0028473	CG8801
RS009336	0.938314	0.107043	-0.3179	-0.393415	-0.0802651	0.118126	3.45182	71.3786	2.13161e-13	2.22648e-12	NA	NA
RS008592	-0.982109	0.226553	0.171593	0.0916048	-0.0939158	0.0477599	3.25047	71.3759	2.13435e-13	2.22784e-12	FBgn0013988	Strn-Mlck
RS004435	-0.884183	-0.259803	0.102065	0.180017	0.0100664	0.463055	6.14303	71.3664	2.1439e-13	2.23631e-12	FBgn0031011	CG8034
RS006854	3.36219	1.89314	-0.555505	-0.992971	0.298037	-2.20237	1.13683	71.3494	2.16123e-13	2.25288e-12	FBgn0039704	neo
RS001977	-0.692033	-0.0783668	0.293079	0.203701	0.175899	0.287823	6.10354	71.2565	2.2583e-13	2.35249e-12	FBgn0035544	CG15021
RS011719	-1.10017	0.175749	0.608974	0.171903	0.800654	-0.582048	1.97859	71.1817	2.33958e-13	2.43554e-12	FBgn0030591	CG9517
RS000205	-1.26433	-0.11886	-0.0051382	0.599288	0.351717	0.13639	2.6145	71.1596	2.36407e-13	2.45939e-12	NA	NA
RS006873	4.87224	1.76974	0.0423661	-1.53558	1.31685	-2.14582	2.60682	71.1408	2.3852e-13	2.47972e-12	FBgn0086687	desat1
RS001234	-0.927961	-0.107564	0.9489	-0.33459	0.119689	-0.139831	3.88813	71.0475	2.49271e-13	2.58976e-12	FBgn0051973	Cda5
RS009114	1.45145	0.134049	-0.716233	-0.741018	-0.398915	-0.0465869	3.95767	71.0131	2.53363e-13	2.63052e-12	FBgn0025815	Mcm6
RS014480	-0.688918	0.256378	-1.30822	-0.213659	-0.345327	0.429094	5.21176	70.966	2.5907e-13	2.6875e-12	NA	NA
RS008369	-1.16396	-0.209547	0.131068	-0.0527307	-0.0387262	0.50287	5.0895	70.9649	2.59197e-13	2.6875e-12	FBgn0032008	CG14277
RS012566	0.686582	0.0851734	-0.138764	0.0167723	0.030016	-0.295062	5.73086	70.9598	2.5983e-13	2.69228e-12	FBgn0010774	Ref1
RS007989	1.68964	-0.243408	-0.58066	-0.228722	-0.596854	-0.498718	3.65427	70.8725	2.70767e-13	2.80375e-12	FBgn0051559	CG31559
RS014898	1.07171	-0.208634	0.691371	0.259257	0.178893	0.10122	3.87978	70.8341	2.75724e-13	2.85317e-12	FBgn0031515	CG9664
RS005313	0.140912	0.109776	2.39228	1.85069	2.40109	-0.499567	3.82904	70.8279	2.76535e-13	2.85967e-12	FBgn0019972	Ice
RS015326	-1.10643	-0.287049	0.595017	0.132685	-0.0980153	0.384972	4.30079	70.817	2.77966e-13	2.87256e-12	FBgn0011280	Pbprp2
RS010366	0.613047	0.156917	-0.141489	-0.0713521	-0.214722	-0.192312	5.72719	70.7947	2.80911e-13	2.90107e-12	FBgn0035334	CG8993
RS001793	-0.474867	0.550148	-1.25799	-1.82888	-2.94902	-0.313206	1.22433	70.7756	2.83448e-13	2.92533e-12	NA	NA
RS000987	-0.701593	-0.215711	-0.0846461	0.0912308	-0.00392513	0.192515	4.84123	70.7002	2.93741e-13	3.02956e-12	FBgn0036910	Cyp305a1
RS004382	0.49508	-0.0875458	-0.165158	-0.105407	-0.0580631	0.0598825	7.11884	70.6379	3.02511e-13	3.11794e-12	FBgn0001247	Ide
RS013123	0.533764	0.130886	0.114236	0.0165902	0.0880775	-0.135927	6.06667	70.6041	3.07382e-13	3.16605e-12	FBgn0033209	CG12107
RS010102	0.886433	0.0535999	-0.0384799	-0.0348376	0.20761	-0.0586385	5.32236	70.5687	3.1257e-13	3.21737e-12	FBgn0005655	mus209
RS004296	0.453413	-0.00663251	-0.169298	-0.139904	-0.0995356	-0.0429976	7.11709	70.5648	3.13136e-13	3.22106e-12	FBgn0000146	aub
RS008982	-1.1265	0.113535	-0.9447	-0.266369	-1.66663	-0.256486	1.81158	70.5324	3.17979e-13	3.26872e-12	NA	NA
RS015566	0.622221	-0.00212176	-0.0337072	-0.119799	-0.0108753	-0.12075	6.00168	70.4999	3.22897e-13	3.31709e-12	FBgn0033039	gp210
RS006338	-0.550408	0.111541	0.110269	0.0105084	-0.0519347	-0.0834614	5.16409	70.3449	3.4743e-13	3.56676e-12	FBgn0051221	CG31221
RS013232	1.96321	-0.139866	2.14454	1.39459	1.38607	-0.673822	1.04019	70.332	3.49548e-13	3.58614e-12	FBgn0259794	sinah
RS008214	-0.485656	-0.0491238	0.335385	0.349089	0.208714	0.0887103	6.86876	70.2891	3.56703e-13	3.65715e-12	FBgn0264255	para
RS014215	0.421369	-0.0499341	-0.241706	-0.206966	-0.277387	0.0806311	6.75543	70.2227	3.68072e-13	3.77123e-12	FBgn0011768	Fdh
RS003976	0.504476	-0.16493	0.370427	0.294914	0.408249	0.115752	4.86447	70.1432	3.82145e-13	3.91284e-12	FBgn0264490	Eip93F
RS010286	0.481002	-0.0520351	-0.155019	-0.0045638	-0.0431317	-0.000326117	8.03028	70.0927	3.91379e-13	4.00476e-12	FBgn0035753	RpL18
RS004480	-0.835391	-0.229161	0.240689	0.0684547	0.0904301	0.119949	4.13169	70.0792	3.93885e-13	4.02776e-12	FBgn0260657	CG42540
RS011323	-0.253389	0.28019	0.791315	0.675754	0.474618	0.0087242	4.95958	69.9992	4.0904e-13	4.17998e-12	NA	NA
RS004144	-0.848146	-0.0338987	0.151968	0.114127	-0.008112	0.259436	6.94699	69.8648	4.35845e-13	4.45099e-12	FBgn0036659	CG9701
RS005966	0.626538	-0.153456	-0.301094	-0.362784	-0.232923	0.00171591	5.7666	69.8341	4.42206e-13	4.51299e-12	FBgn0003292	rt
RS001547	-1.2772	-0.11198	0.416035	0.0185835	0.0917183	0.222577	2.74073	69.8269	4.43719e-13	4.52547e-12	FBgn0034639	CG15673
RS010411	0.797822	-0.0604974	-0.0486328	-0.0918868	0.0675705	0.0361601	6.5757	69.8076	4.47779e-13	4.56389e-12	FBgn0020386	Pdk1
RS013322	-0.676891	0.0727002	0.204138	0.170335	0.108422	-0.0580203	7.70203	69.7728	4.55185e-13	4.63634e-12	FBgn0035802	CG33275
RS002639	-0.760036	-0.777793	-0.211882	-0.532946	-0.198864	0.559717	4.39671	69.7617	4.57584e-13	4.65773e-12	FBgn0063923	Kaz1-ORFB
RS007580	-0.549934	-0.0472107	0.0880388	0.0356869	0.00072588	0.134178	6.2958	69.7574	4.58525e-13	4.66427e-12	FBgn0040752	Prosap
RS004335	-0.72138	0.161968	0.149728	0.0797062	-0.0227128	-0.0747358	4.18567	69.7474	4.60687e-13	4.6832e-12	FBgn0260499	qvr
RS010362	-0.692365	-0.101942	0.131373	0.0547434	-0.0863072	0.228863	5.63229	69.7445	4.61317e-13	4.68651e-12	FBgn0051038	CG31038
RS009676	0.81219	0.133275	-0.157891	-0.23082	-0.00577087	-0.30559	4.63753	69.7431	4.61614e-13	4.68651e-12	FBgn0000426	SmF
RS011996	0.413571	-0.155205	0.056151	0.0196923	0.076307	0.00821147	6.66553	69.4921	5.19684e-13	5.27263e-12	FBgn0034734	CG4554
RS014365	0.763727	-0.0259094	-0.00973148	-0.0219822	0.00515694	-0.0699931	4.39267	69.4422	5.3209e-13	5.39499e-12	FBgn0000318	cl
RS011445	2.84908	0.755458	1.98407	0.303617	1.41788	-2.26836	0.530735	69.4055	5.41368e-13	5.48548e-12	FBgn0000182	BicC
RS011463	0.616553	-0.463501	-0.263639	-0.0429316	-0.220139	0.589607	3.74535	69.3886	5.45712e-13	5.52591e-12	FBgn0031959	spz3
RS014977	-0.325754	0.128648	0.754725	0.422345	0.229412	-0.429712	8.20595	69.3478	5.5633e-13	5.62978e-12	FBgn0030575	CG5321
RS010627	0.479071	0.0105385	0.174525	0.142511	0.14967	0.256673	5.3845	69.3031	5.68198e-13	5.74614e-12	FBgn0030890	CG7536
RS011642	-1.00982	-0.0982272	0.104072	0.223576	-0.203703	0.495295	3.92965	69.2944	5.70528e-13	5.76389e-12	FBgn0033943	CG12869
RS002258	-0.868059	-0.0401667	0.061517	0.0588981	-0.0205171	0.437071	6.38953	69.2938	5.70693e-13	5.76389e-12	FBgn0039039	lmd
RS013655	-0.436466	-0.133057	-0.170949	-0.161708	-0.213593	0.242688	9.32662	69.2094	5.93872e-13	5.99411e-12	FBgn0260745	mfas
RS010439	-0.606853	-0.289054	0.124942	0.0147955	-0.00139305	0.407077	6.50958	69.1935	5.98364e-13	6.03553e-12	FBgn0001083	fw
RS012616	0.30534	-0.249305	0.0513453	0.001391	0.00654822	0.392019	7.91732	69.0575	6.38013e-13	6.4313e-12	FBgn0043364	cbt
RS011668	-0.462874	0.14469	0.109828	0.187352	0.59741	0.0611181	5.13675	69.0495	6.40437e-13	6.45156e-12	NA	NA
RS001416	-0.923789	-0.346174	0.216866	0.44697	0.53046	0.32924	6.47728	69.0445	6.41928e-13	6.4624e-12	FBgn0031703	CG12512
RS014727	0.331987	-0.0644373	-0.282305	-0.323928	-0.370276	0.0484136	6.02442	69.0339	6.45151e-13	6.49066e-12	NA	NA
RS004082	-0.802178	-0.229494	0.0175932	-0.0896273	-0.0109356	0.176128	4.94147	69.024	6.48189e-13	6.51701e-12	NA	NA
RS011800	-0.746744	-0.0248153	0.00837092	0.0573445	-0.189219	-0.177674	5.58148	69.0175	6.50166e-13	6.53268e-12	FBgn0037684	CG8129
RS011853	-0.543362	-0.122075	-0.00759591	-0.0359874	-0.256328	0.229357	6.76865	69.0035	6.54465e-13	6.57164e-12	FBgn0010548	Aldh-III
RS001805	-1.05543	0.0693067	0.162697	-0.00838935	-0.234992	0.258708	3.34449	68.9919	6.58082e-13	6.60371e-12	FBgn0038986	CG5278
RS001903	-0.545251	-0.0614579	0.344164	0.223105	0.211883	0.194045	5.87081	68.9026	6.86403e-13	6.88347e-12	FBgn0263072	CG43347
RS005241	-0.793609	-0.0228514	0.218898	0.285317	0.159257	0.148103	5.45951	68.8807	6.93525e-13	6.95042e-12	FBgn0038641	CG7708
RS005436	0.412194	-0.0606641	-0.0766403	0.00811831	-0.0228557	-0.0275804	6.62843	68.8493	7.03884e-13	7.04969e-12	FBgn0020497	emb
RS013490	-0.413968	0.09796	0.020869	0.021043	0.0830501	0.0670183	7.18026	68.8011	7.20055e-13	7.20702e-12	NA	NA
RS006861	-1.1521	0.0172977	0.212236	0.214456	0.291887	0.470374	3.29772	68.7406	7.409e-13	7.4109e-12	FBgn0051646	CG31646
RS006822	0.128725	0.647329	5.7084	-0.0228418	5.67919	-0.543486	0.0312997	68.7291	7.4495e-13	7.44663e-12	NA	NA
RS005697	-0.596125	-0.0142426	0.232461	0.111314	0.0529839	0.0611194	5.10611	68.7024	7.54385e-13	7.53611e-12	FBgn0260775	DnaJ-60
RS003799	-0.604086	-0.0665833	0.0677508	0.236007	0.149947	0.236192	5.9291	68.6743	7.64442e-13	7.63169e-12	FBgn0032456	MRP
RS006645	-0.790906	-0.13784	0.152717	-0.282321	-0.0395121	0.311044	6.94398	68.6454	7.74948e-13	7.73162e-12	FBgn0000244	by
RS013416	0.376695	-0.103751	-0.0686849	-0.0366147	-0.128299	0.0871191	6.89135	68.5558	8.08394e-13	8.06015e-12	FBgn0028693	Rpn12
RS010381	0.523425	0.19021	-0.0830435	-0.576546	-0.371506	-0.0328151	4.41974	68.5123	8.25153e-13	8.22198e-12	FBgn0027903	CG12018
RS009519	0.604056	-0.146671	-0.0532468	0.0283877	-0.0859663	0.225009	6.50352	68.5027	8.28881e-13	8.25386e-12	FBgn0034142	CG8306
RS001580	-0.630367	-0.0248226	-0.0915889	-0.180106	-0.168488	-0.10373	7.69112	68.455	8.47755e-13	8.43641e-12	FBgn0033629	Tsp47F
RS000869	-0.6837	-0.0817773	0.0594702	-0.0756116	-0.0328327	0.243915	5.91205	68.4519	8.48988e-13	8.44329e-12	FBgn0002921	Atpalpha
RS009161	0.54362	0.127996	0.0688107	0.218997	0.109685	0.0909604	8.43216	68.4323	8.56874e-13	8.51628e-12	FBgn0039156	CG6178
RS009310	0.589255	0.122399	0.120098	-0.00614628	-0.0767819	-0.0891748	5.58953	68.3832	8.76932e-13	8.71008e-12	FBgn0034176	ste24a
RS007489	-0.693152	-0.144917	0.515505	0.24377	0.316612	0.214958	7.5447	68.3757	8.80078e-13	8.73576e-12	FBgn0001149	GstD1
RS003148	0.707236	-0.0912242	-0.0180997	-0.124641	-0.129457	0.0718045	5.95145	68.3545	8.889e-13	8.81771e-12	FBgn0051460	CG31460
RS003210	0.942617	0.114895	0.166053	0.0905717	0.269779	-0.350945	4.64624	68.3381	8.95783e-13	8.88033e-12	FBgn0024365	CG12773
RS011730	-0.443654	-0.0638241	0.360031	0.173008	0.137524	0.166861	6.72686	68.3038	9.10407e-13	9.01957e-12	NA	NA
RS013883	-0.793267	-0.235092	0.0718158	0.329114	0.488064	0.51119	6.558	68.2479	9.34749e-13	9.25484e-12	FBgn0050446	Tdc2
RS013029	-0.768198	0.0406731	-0.126147	0.0258491	-0.358608	-0.0745733	5.11447	68.1964	9.57713e-13	9.47619e-12	FBgn0037782	Npc2d
RS001085	0.572267	0.128631	-0.0689099	-0.10214	-0.0935263	-0.119506	6.19622	68.1713	9.69127e-13	9.58304e-12	FBgn0004003	wbl
RS015184	0.793866	-0.0254453	0.723519	0.486908	0.983904	0.3902	2.82515	68.1249	9.90552e-13	9.78869e-12	FBgn0035711	CG8519
RS008076	0.461336	-0.0920616	0.0799499	0.0249598	-0.0549632	0.0597241	6.74167	68.1073	9.98786e-13	9.86381e-12	FBgn0035909	ergic53
RS008876	0.843007	0.120334	0.0138053	0.0176277	-0.0194861	0.0295041	3.95514	68.0876	1.00811e-12	9.94959e-12	FBgn0017577	Mcm5
RS006393	0.812309	-0.268119	-0.154898	-0.42461	-0.109772	0.278346	4.85835	68.0606	1.02103e-12	1.00707e-11	FBgn0037323	CG2663
RS014417	-0.613874	-0.0718171	0.246986	0.283211	0.326407	-0.0371566	5.09625	68.0135	1.04397e-12	1.02904e-11	FBgn0261788	Ank2
RS015022	-0.350149	0.124676	-0.000702055	0.0801087	0.0472614	-0.0385289	6.78706	67.9003	1.10118e-12	1.08475e-11	FBgn0052486	CG32486
RS010248	-0.694664	0.0284268	0.113223	0.10751	-0.0666915	0.0695102	6.46412	67.7911	1.15933e-12	1.14131e-11	FBgn0036616	CG4893
RS006342	0.580059	0.079796	-0.0698887	-0.126553	-0.050946	-0.152956	6.83894	67.688	1.21711e-12	1.19744e-11	FBgn0030930	GalNAc-T2
RS003425	-0.46761	-0.0318191	0.0899681	0.0213615	0.575557	0.126675	6.27277	67.6753	1.2244e-12	1.20385e-11	NA	NA
RS006333	1.01679	0.13734	-0.238771	-0.360282	0.0537165	-0.252396	4.6997	67.5092	1.3241e-12	1.30105e-11	FBgn0014861	Mcm2
RS007361	-0.379427	-0.048996	0.256654	0.328565	0.207722	0.0816168	7.13318	67.4938	1.33373e-12	1.30969e-11	FBgn0032479	CG16974
RS008033	-0.446433	0.0557229	0.148343	0.204152	0.0407866	0.0416261	7.16936	67.4373	1.36972e-12	1.34419e-11	FBgn0033194	Vps13
RS000169	0.43788	0.00794653	-0.0166149	0.120072	0.118512	-0.091769	6.47985	67.4334	1.37224e-12	1.34581e-11	FBgn0261286	Mat89Ba
RS001976	-0.543863	0.03903	0.117495	0.0878526	-0.0369086	0.0625677	5.78078	67.3787	1.40807e-12	1.37963e-11	FBgn0000256	capu
RS003590	-0.854184	-0.158466	0.505978	0.163168	0.180147	0.357785	4.05984	67.3781	1.40849e-12	1.37963e-11	FBgn0034471	Obp56e
RS009012	0.640395	0.305804	-0.0798359	0.199773	0.53672	-0.15064	5.06611	67.3707	1.4134e-12	1.38357e-11	FBgn0051860	CG31860
RS003483	3.10557	1.32039	2.07836	1.61705	1.56809	-2.31739	1.65053	67.3571	1.42249e-12	1.39106e-11	FBgn0039665	CG2310
RS011073	0.348828	-0.00695185	-0.848452	-0.652351	-0.466465	-0.159701	5.07314	67.3566	1.42283e-12	1.39106e-11	FBgn0051150	CG31150
RS006923	-1.28695	-0.25299	0.18078	-0.345782	0.0441119	0.100777	2.3771	67.317	1.44959e-12	1.41632e-11	FBgn0264089	sli
RS002106	0.573854	-0.321606	-0.366645	-0.153691	-0.392004	0.402511	4.53323	67.2464	1.49866e-12	1.46335e-11	FBgn0264488	CG43896
RS000517	-0.99327	-0.215363	0.568075	0.460005	0.340335	0.147387	3.35591	67.1988	1.53259e-12	1.49555e-11	NA	NA
RS001244	-2.13252	0.17473	-0.0619783	0.0784695	0.458641	0.237976	1.22044	67.1805	1.54592e-12	1.50761e-11	FBgn0029995	CG2256
RS001471	-0.365387	-0.183997	-0.136865	-0.260268	-0.0830671	0.0444028	7.31341	67.1586	1.56189e-12	1.52223e-11	FBgn0003137	Ppn
RS010799	1.10869	0.372183	-0.335872	-0.508963	-0.221128	-0.363082	3.45223	67.1016	1.60447e-12	1.56233e-11	FBgn0020633	Mcm7
RS011914	-1.11865	-0.132162	0.299815	-0.120455	0.265122	0.30315	3.37848	67.1008	1.60503e-12	1.56233e-11	FBgn0031629	Clect27
RS014514	0.251785	0.00965984	0.00717701	-0.018606	-0.0421523	0.0323211	8.55858	67.0655	1.63196e-12	1.58754e-11	FBgn0028479	Mtpalpha
RS014262	2.55449	0.44006	0.79248	1.22286	0.746491	-1.0578	1.26094	67.0557	1.63947e-12	1.59385e-11	NA	NA
RS014838	-0.706287	0.136331	-0.156267	-0.161948	-0.407896	0.135915	4.43093	67.05	1.64392e-12	1.59718e-11	NA	NA
RS014669	0.701392	-0.123804	-1.0136	-0.823757	-0.850146	-0.507878	3.84771	67.0072	1.67742e-12	1.62872e-11	FBgn0001085	fz
RS012153	0.663742	-0.135113	-0.089376	-0.136078	0.0359507	-0.0362114	4.96654	66.9937	1.6881e-12	1.6375e-11	FBgn0050403	CG30403
RS001926	0.453905	0.0266627	-0.180616	-0.118425	-0.0887518	0.0873923	6.49556	66.9931	1.68857e-12	1.6375e-11	FBgn0030136	RpS28b
RS009928	-1.23712	-0.14014	-0.0977636	-0.1952	-0.0678987	0.196062	2.92851	66.9799	1.69906e-12	1.64665e-11	FBgn0034136	DAT
RS009744	0.935247	0.394953	0.781312	1.56853	0.48571	0.395263	1.79817	66.9205	1.74729e-12	1.6923e-11	FBgn0039768	CG15533
RS008235	0.637047	-0.0487115	-0.133071	-0.0106607	0.114836	0.112986	4.98207	66.9193	1.74834e-12	1.6923e-11	FBgn0026252	msk
RS010046	0.890896	0.0773458	0.0868564	0.0567028	0.177741	-0.338641	5.23557	66.8983	1.76566e-12	1.70801e-11	FBgn0036004	Jarid2
RS002082	0.46722	-0.134399	-0.311413	-0.225189	-0.117592	-0.0685349	5.79649	66.8205	1.83157e-12	1.77016e-11	FBgn0262601	SmB
RS013515	3.48225	-0.850155	3.17434	2.23251	3.11376	-1.6065	-0.189338	66.8198	1.83218e-12	1.77016e-11	FBgn0003410	sina
RS002252	1.00265	-0.317795	0.545932	0.421964	0.368752	-0.0462333	6.69107	66.8103	1.84038e-12	1.77698e-11	FBgn0024238	Fim
RS013980	0.798281	0.115712	0.108498	0.0556521	-0.0277365	-0.14594	4.77781	66.6379	1.99609e-12	1.92613e-11	FBgn0036300	CG10688
RS007613	-0.789749	0.135997	-0.113735	-0.0211761	-0.0952267	-0.132737	3.70406	66.6249	2.00831e-12	1.93673e-11	FBgn0002937	ninaB
RS006343	0.491845	-0.236789	-0.0446006	-0.100979	0.00678072	0.258786	5.13213	66.5749	2.05616e-12	1.98164e-11	FBgn0037875	CG6672
RS014363	-0.315526	0.0562945	0.160655	0.0837101	0.133722	-0.0146238	7.94007	66.527	2.10306e-12	2.02559e-11	FBgn0035253	CG7971
RS004808	-0.83928	-0.102933	0.072277	0.14481	0.173671	0.282006	4.99322	66.4928	2.1372e-12	2.0572e-11	NA	NA
RS010441	-5.8579	-0.575241	1.71506	0.854827	0.94026	3.06837	-0.0886887	66.4762	2.15392e-12	2.07202e-11	FBgn0011695	PebIII
RS002213	-0.631342	-0.0544031	-0.0573322	0.151745	0.0436302	0.190852	6.06586	66.4344	2.19679e-12	2.11196e-11	FBgn0259818	CG42399
RS014577	2.5695	-0.0993235	1.96323	0.572399	1.24249	-0.738197	0.564469	66.4066	2.22567e-12	2.1384e-11	FBgn0035113	pyx
RS003668	2.46665	-0.738875	1.51669	1.548	1.34151	-0.0406913	2.44951	66.3044	2.33541e-12	2.24246e-11	FBgn0027588	CG14476
RS000404	0.928197	-0.00610596	-0.517457	-0.523676	-0.267828	-0.155535	9.90836	66.2819	2.36029e-12	2.26494e-11	FBgn0013988	Strn-Mlck
RS010315	-0.212606	0.115391	0.0157407	-0.0510781	0.200775	-0.184555	7.18021	66.255	2.39037e-12	2.2924e-11	FBgn0039165	CG6204
RS003473	1.31125	-0.0322442	-0.497285	-2.58926	-0.698449	-0.532524	1.52513	66.2408	2.40642e-12	2.30638e-11	NA	NA
RS010848	1.0437	-0.24573	-0.669035	-0.45313	-0.355006	-0.155746	2.88292	66.2256	2.4237e-12	2.32151e-11	FBgn0263118	tx
RS004199	-0.9524	-0.187288	0.0372245	0.185423	0.0393179	0.0755415	3.47063	66.1412	2.52184e-12	2.41403e-11	FBgn0036158	CG6149
RS008780	-0.768606	-0.139845	0.304529	0.0704966	-0.000746014	0.408099	5.94542	66.1239	2.54247e-12	2.43228e-11	FBgn0031294	IA-2
RS012545	0.774024	0.0946463	2.68686	1.6432	2.20745	-0.42151	1.83575	66.1118	2.55698e-12	2.44466e-11	FBgn0263256	CG43394
RS015097	0.781352	-0.125917	-0.641338	-0.402642	-0.377082	0.0849592	7.34164	66.0817	2.59345e-12	2.47795e-11	FBgn0003884	alphaTub84B
RS006046	0.30215	-0.0618991	-0.0303811	0.0476094	0.0243331	0.0125972	7.43233	66.0805	2.59498e-12	2.47795e-11	FBgn0026418	Hsc70Cb
RS009668	2.26908	-0.369181	2.93168	2.43997	2.25775	0.0247219	1.14449	66.0665	2.61218e-12	2.49285e-11	FBgn0250815	Jon65Aiv
RS005444	0.573876	0.0404776	-0.161468	-0.12341	-0.207458	-0.133575	6.08515	66.0385	2.64682e-12	2.52436e-11	FBgn0034654	CG10306
RS011727	-0.679938	0.0665208	0.0951482	0.220745	0.0594324	0.0784883	9.13889	66.0054	2.68835e-12	2.5624e-11	NA	NA
RS013582	0.568293	-0.0233285	-0.0101198	0.00525899	0.037694	-0.132432	5.4755	65.9627	2.74286e-12	2.61276e-11	FBgn0032915	CG12050
RS014864	0.141099	0.515665	2.29424	1.29097	1.74171	-0.18436	4.10978	65.9512	2.75771e-12	2.6253e-11	NA	NA
RS014119	-0.564727	-0.171914	0.339471	0.277617	0.0246525	0.228068	5.1601	65.9368	2.77647e-12	2.64155e-11	FBgn0261550	CG42668
RS009214	-0.438308	0.00890449	0.0308148	-0.00875325	-0.0213984	-0.0327616	6.27026	65.9352	2.77856e-12	2.64192e-11	FBgn0004876	cdi
RS012970	1.87964	0.120031	0.833882	0.726004	0.486339	-0.741796	2.73095	65.9276	2.78854e-12	2.6498e-11	FBgn0085259	CG34230
RS004584	-1.0445	0.308133	0.213589	0.503689	0.35189	-0.154511	2.74296	65.8897	2.83869e-12	2.69581e-11	FBgn0035575	CG7509
RS000370	-0.513249	0.14418	0.585514	0.600812	0.459654	-0.213812	4.86771	65.8824	2.84858e-12	2.70355e-11	FBgn0011676	Nos
RS002468	2.68937	0.650282	1.86513	2.06168	1.40336	-1.6913	1.61321	65.8555	2.88482e-12	2.73628e-11	NA	NA
RS013420	-1.12435	-0.13341	0.451896	0.130523	0.0466048	0.413874	6.3793	65.6651	3.15517e-12	2.99089e-11	FBgn0031109	Obp19a
RS003054	-2.62447	0.155421	-1.91526	-1.2743	-1.17008	-1.27219	0.183579	65.5898	3.26898e-12	3.09688e-11	NA	NA
RS003166	0.424155	0.039813	-0.0474625	0.0437174	0.0669139	0.0489353	8.61542	65.4949	3.41821e-12	3.23629e-11	FBgn0010078	RpL23
RS010975	-1.53668	-0.461909	0.553513	0.47208	0.412053	0.816335	5.38755	65.471	3.45686e-12	3.2709e-11	FBgn0015032	Cyp4c3
RS000129	0.493292	0.085917	-0.185194	-0.134653	0.0404966	-0.147972	5.89858	65.4644	3.46761e-12	3.27908e-11	FBgn0040078	pont
RS010747	0.438293	-0.222696	0.171919	-0.119319	0.0437807	0.298381	5.68935	65.4174	3.54511e-12	3.35034e-11	FBgn0034860	CG9812
RS008601	0.335629	0.195444	1.3762	0.895342	1.12133	0.0211195	3.81951	65.4039	3.5677e-12	3.36963e-11	FBgn0053126	NLaz
RS014530	-0.998036	0.0705392	-0.245684	-0.10512	-0.42602	0.353984	3.72809	65.3906	3.59008e-12	3.38872e-11	FBgn0010407	Ror
RS001372	0.862153	-0.130929	-0.285322	-0.546337	-0.274057	0.441729	2.92181	65.3099	3.72901e-12	3.51773e-11	FBgn0037832	Desi
RS010064	2.80466	0.445915	-2.25482	-3.07099	-0.783131	-0.710921	6.63995	65.2928	3.759e-12	3.54387e-11	NA	NA
RS003421	-0.76207	-0.196179	0.199937	-0.0116947	-0.028796	0.313521	6.47329	65.1746	3.97401e-12	3.74418e-11	FBgn0000477	DNaseII
RS014468	0.651262	-0.082743	-1.81803	-2.5126	-2.1563	-0.0441433	0.794227	65.1733	3.97627e-12	3.74418e-11	FBgn0261714	Cpn
RS008816	1.4449	-0.0951798	0.716749	0.0967246	0.463251	0.220428	5.59508	65.1571	4.00671e-12	3.77057e-11	FBgn0036995	CG5195
RS015578	0.337866	-0.0893144	0.447505	-0.222145	-0.0803372	-0.0641992	5.31581	65.0333	4.24692e-12	3.9942e-11	NA	NA
RS008062	1.72082	-0.208361	-1.36066	-1.43296	-0.735679	-0.388291	1.19422	65.0159	4.28185e-12	4.02462e-11	FBgn0039648	CG14515
RS010379	-0.306151	0.0910744	0.0875367	0.0505961	0.157527	0.00467713	8.60956	65.0006	4.31269e-12	4.05118e-11	NA	NA
RS013076	0.390496	-0.0999316	0.0202932	-0.0222435	-0.0465548	0.121309	7.53075	64.9278	4.46282e-12	4.18968e-11	FBgn0050360	Mal-A6
RS006801	0.211471	-0.0176324	-0.339916	-0.11013	-0.348302	0.102262	6.51245	64.8929	4.53673e-12	4.25649e-11	FBgn0011774	Irbp
RS014104	-0.603876	0.263833	-0.360362	-0.375418	-0.993912	0.176499	9.30286	64.8703	4.58525e-12	4.29943e-11	NA	NA
RS007702	0.57922	-0.117422	-0.0165204	0.0437844	0.0556954	0.237987	4.86225	64.8201	4.6948e-12	4.39951e-11	FBgn0032480	Edem2
RS008139	-0.52819	0.119982	0.024212	0.0618828	0.331986	0.0101397	4.81604	64.7877	4.76675e-12	4.46425e-11	NA	NA
RS000010	1.56955	0.49387	-0.0647895	-0.107387	0.345018	-0.459186	3.83189	64.7677	4.81176e-12	4.50369e-11	FBgn0035918	Cdc6
RS015302	5.66016	0.1019	2.94794	1.45687	2.7401	-2.22659	-0.420916	64.7521	4.8472e-12	4.53414e-11	FBgn0085397	Fili
RS010423	-0.29219	-0.502163	-0.868914	-1.49601	-1.23078	0.316102	2.89968	64.7312	4.89494e-12	4.57605e-11	NA	NA
RS007284	-0.357847	-0.0327272	0.0889365	0.105756	0.0948789	0.0648605	7.4335	64.6888	4.99353e-12	4.66542e-11	FBgn0001624	dlg1
RS015135	-1.53336	-0.504338	1.88044	1.34154	1.4192	0.461521	1.32551	64.6198	5.15826e-12	4.81644e-11	NA	NA
RS012462	-0.707865	0.01612	0.0200645	-0.0535608	-0.292725	-0.0912972	3.98766	64.6064	5.1908e-12	4.84392e-11	FBgn0029896	CG3168
RS004068	3.54277	0.791316	3.91812	2.49306	2.80241	-2.36448	-0.041248	64.5746	5.26883e-12	4.91379e-11	NA	NA
RS013670	0.55164	-0.00295504	-0.121626	0.0116446	-0.0208165	-0.0907212	6.19158	64.3341	5.89938e-12	5.49856e-11	FBgn0014879	Set
RS008199	-1.01925	0.0754824	0.157758	-0.148927	-0.329289	0.0759027	3.76468	64.2715	6.0754e-12	5.65924e-11	FBgn0030050	CG12111
RS008279	-0.636555	0.166673	0.301475	0.246725	0.295429	-0.0362238	4.68815	64.2159	6.23614e-12	5.80549e-11	FBgn0003386	Shaw
RS006915	-0.45598	0.157355	0.294563	0.36516	0.311035	-0.171915	5.25487	64.1695	6.37374e-12	5.93005e-11	FBgn0263218	Dscam2
RS004436	-0.673257	-0.0096925	0.134614	0.13007	0.0814063	0.175302	5.85256	64.1373	6.47083e-12	6.01679e-11	FBgn0031011	CG8034
RS003717	0.382105	-0.156147	-0.158287	0.102261	-0.16681	0.121202	5.39443	64.1275	6.50072e-12	6.04098e-11	FBgn0031020	Nat1
RS013376	0.698332	-0.11279	-0.425548	-0.608266	-0.384568	-0.096585	4.05736	64.1096	6.55569e-12	6.08843e-11	FBgn0035607	CG4835
RS014715	0.868464	-0.0644515	0.0516341	-0.139878	0.0586505	-0.329173	5.77194	64.1016	6.58031e-12	6.10765e-11	FBgn0035772	Sh3beta
RS013498	-0.350769	0.161364	0.0881687	0.12841	0.13002	-0.0471718	6.69376	64.0829	6.63822e-12	6.15774e-11	FBgn0053547	Rim
RS008152	5.35738	0.165831	1.65298	1.47125	0.881952	-1.48258	4.84447	64.0329	6.79616e-12	6.30049e-11	FBgn0038098	CG7381
RS005249	-0.537414	0.00395647	-0.179519	-0.197559	-0.294661	0.013851	6.39644	64.0068	6.87999e-12	6.37098e-11	FBgn0053300	Muc30E
RS004060	-0.660032	0.185848	0.616461	0.600116	0.524541	0.0358732	4.0936	64.0067	6.88037e-12	6.37098e-11	FBgn0005536	Mbs
RS006877	0.199531	-0.126682	-1.03051	-1.14301	-1.44965	0.443698	2.72067	63.8734	7.32496e-12	6.77863e-11	FBgn0039754	CG9747
RS003137	-0.290525	-0.0285299	-0.218153	-0.157001	-0.124245	-0.0404874	7.48887	63.8251	7.49301e-12	6.93003e-11	FBgn0010226	GstS1
RS002837	-0.75497	-0.022099	0.523894	0.333333	0.325407	0.131584	3.85941	63.8078	7.554e-12	6.9823e-11	FBgn0031835	CG11319
RS002022	0.793595	0.221639	0.202057	0.0957106	0.123244	-0.162551	4.26611	63.8052	7.5632e-12	6.98665e-11	FBgn0000115	Arf72A
RS009778	0.671264	-0.0345406	-0.163074	-0.177781	-0.1679	-0.13161	6.48513	63.7774	7.66258e-12	7.07426e-11	FBgn0261561	CG42675
RS003219	-0.313912	0.159467	-0.073678	-0.453769	-0.420184	-0.251672	6.22761	63.7338	7.8213e-12	7.21652e-11	FBgn0027572	CG5009
RS005466	0.901643	0.00353256	-0.324997	-0.334075	-0.240013	-0.350436	5.63669	63.7106	7.90699e-12	7.29128e-11	FBgn0029114	Tollo
RS009846	0.369159	-0.251408	0.2124	0.163296	0.369551	0.274795	5.25558	63.6973	7.95649e-12	7.33258e-11	FBgn0034933	CG3735
RS010059	2.99928	0.929477	-1.88902	-1.86998	-0.402918	-1.15154	7.04463	63.6476	8.14432e-12	7.50125e-11	NA	NA
RS006380	-0.84247	-0.300484	0.225568	0.169057	-0.0479495	0.157175	8.93712	63.629	8.21562e-12	7.56063e-11	FBgn0015766	Msr-110
RS005291	-0.519736	-0.0595245	0.0412482	0.0792125	-0.130294	0.129909	6.47372	63.6283	8.21849e-12	7.56063e-11	FBgn0262619	DNA-ligI
RS004407	0.206223	-0.0267718	-0.137587	-0.0691358	-0.121913	0.0114505	8.27957	63.6173	8.26106e-12	7.5953e-11	FBgn0260962	pic
RS003891	-0.737546	-0.201017	0.470027	0.288419	0.28588	0.359835	6.21409	63.4888	8.77468e-12	8.06277e-11	FBgn0036203	Muc68D
RS000909	-0.943564	0.266429	-0.00544797	-0.491299	0.107045	-0.307864	2.69434	63.4474	8.94707e-12	8.21633e-11	FBgn0030872	Ucp4A
RS000962	-1.0848	-0.652241	0.947181	1.69034	1.64884	0.345812	5.42031	63.4451	8.95673e-12	8.22036e-11	FBgn0032264	Lip4
RS010772	-0.425109	-0.0452714	1.18209	0.527284	-0.0696205	0.156252	2.73269	63.3539	9.34856e-12	8.57492e-11	NA	NA
RS008323	-0.589824	0.142778	-0.00999463	0.0685967	-0.0968098	-0.131823	5.24702	63.3455	9.38536e-12	8.60361e-11	FBgn0262518	Rab8
RS003867	-0.642027	-0.170545	0.0637161	0.131919	0.027706	0.267941	5.24538	63.3349	9.43228e-12	8.64154e-11	FBgn0259734	CG42388
RS006736	0.737936	0.155102	-0.110666	0.0519153	0.00595727	-0.177972	4.46553	63.3234	9.48325e-12	8.68313e-11	FBgn0035708	CG8398
RS009429	-0.468966	-0.0941704	-0.121897	-0.116812	-0.228922	0.139122	7.04861	63.3037	9.57126e-12	8.75857e-11	FBgn0035471	Sc2
RS003704	0.0324152	0.0217656	-0.416046	-0.401684	-0.418681	-0.0900227	8.52668	63.2193	9.95811e-12	9.10723e-11	FBgn0259979	CG17337
RS000323	0.460556	-0.0556643	0.107463	0.233387	0.0345112	0.0948562	5.43268	63.1465	1.03042e-11	9.41826e-11	FBgn0028648	mRpL50
RS012831	1.07361	-0.801284	-0.165704	0.146739	0.294367	0.980292	1.84405	63.1324	1.03725e-11	9.47506e-11	FBgn0259878	Fs
RS014544	-0.838038	0.0604267	0.12269	0.254621	0.0014278	0.176605	3.98185	63.1233	1.0417e-11	9.51014e-11	FBgn0031568	CG10019
RS011313	0.776098	-0.297424	-0.246914	-0.1505	-0.493217	0.240251	3.32302	63.0981	1.05407e-11	9.61645e-11	NA	NA
RS012150	-0.916542	0.0914258	0.273087	0.286389	0.25157	-0.0190254	3.46415	63.0971	1.05458e-11	9.61645e-11	NA	NA
RS014652	2.78188	-0.372646	0.715107	1.17828	2.57168	0.443829	1.01439	62.9937	1.10704e-11	1.0089e-10	FBgn0037895	CG6723
RS009094	0.495106	0.00409908	0.0492189	0.220172	0.0163683	0.0630719	5.31355	62.9847	1.11173e-11	1.01257e-10	FBgn0263977	Tim17b
RS013554	-0.74453	0.0201828	-0.0587407	0.112864	0.158398	0.0542599	4.95626	62.936	1.13741e-11	1.03536e-10	FBgn0000152	Axs
RS000975	1.08172	0.199766	1.70933	1.55063	-0.012841	-0.679821	1.97799	62.9309	1.14012e-11	1.03723e-10	NA	NA
RS002198	-0.678481	-0.29501	0.182387	0.0463621	0.0366175	0.243744	5.31685	62.8773	1.16919e-11	1.06305e-10	FBgn0032167	CG5853
RS002809	-0.327689	-0.15586	-0.0901896	-0.395755	-0.349566	0.167802	7.88071	62.8494	1.18457e-11	1.07641e-10	FBgn0029167	Hml
RS006040	-0.690804	-0.277927	-0.794751	0.571331	0.184455	0.309004	2.95442	62.7872	1.21965e-11	1.10764e-10	FBgn0001168	h
RS002664	0.717016	0.0780436	-0.270297	-0.108448	0.0324876	-0.0915656	4.29635	62.7779	1.22499e-11	1.11184e-10	FBgn0013269	FK506-bp1
RS005524	-0.736911	-0.201911	-0.18885	-0.295612	-0.190549	-0.0731713	4.90771	62.7389	1.24758e-11	1.13168e-10	FBgn0025595	GRHR
RS000574	-0.555108	0.0676996	-0.0820296	-0.064343	-0.1491	-0.0144494	5.19992	62.7333	1.25089e-11	1.13402e-10	FBgn0015591	Ast
RS002518	0.415255	0.114515	-0.140146	-0.156464	-0.131587	-0.0470237	9.65697	62.7076	1.26606e-11	1.14697e-10	FBgn0005278	Sam-S
RS015162	0.180099	-0.0287068	-0.228689	0.128895	-0.194267	0.0101013	6.65026	62.7066	1.26664e-11	1.14697e-10	FBgn0005592	btl
RS013423	-0.869472	-0.0687944	0.364062	0.234141	0.326152	0.310486	4.70809	62.6303	1.3128e-11	1.18808e-10	FBgn0031109	Obp19a
RS010892	-0.589453	0.259792	-0.0740864	-0.0280093	-0.199717	-0.0606563	8.06332	62.59	1.33784e-11	1.21003e-10	NA	NA
RS003531	0.248092	-0.0564964	0.453359	0.294809	0.433153	0.111525	8.01764	62.4748	1.41212e-11	1.27647e-10	FBgn0042085	Bap170
RS008579	0.0352114	0.0812473	-0.611531	-0.296995	-0.578243	-0.0901367	6.70701	62.4305	1.4418e-11	1.30255e-10	FBgn0036211	CG5946
RS008584	1.94938	0.673523	-0.577679	-0.828105	-0.327365	-0.583722	2.0306	62.4201	1.44882e-11	1.30813e-10	FBgn0024920	Ts
RS002546	-0.358397	-0.675679	0.526912	-0.0115572	0.0917073	0.775076	6.65419	62.3141	1.52266e-11	1.37401e-10	FBgn0010435	emp
RS004895	-0.781974	-0.0707429	1.65594	0.574375	0.821633	0.0210164	1.91261	62.3036	1.53019e-11	1.38001e-10	FBgn0027843	CAH2
RS009514	0.73604	0.134231	-0.203722	-0.284353	-0.310783	-0.321959	4.783	62.261	1.56103e-11	1.40701e-10	FBgn0033548	CG7637
RS003904	-1.32424	-0.445058	0.489426	0.320043	0.389727	0.61028	3.34548	62.2111	1.59805e-11	1.43954e-10	FBgn0051100	CG31100
RS013696	0.493413	0.0147095	0.0444919	0.144943	0.0307784	-0.04351	5.70559	62.2015	1.60524e-11	1.44518e-10	FBgn0030101	CG12118
RS014023	0.523768	0.0428063	-0.0915272	-0.00642785	0.0178555	-0.131225	5.99449	62.1292	1.66055e-11	1.49411e-10	FBgn0027330	l(1)G0020
RS005908	0.484264	-0.0169	0.0978794	-0.0184009	-0.082069	0.0340467	6.44081	62.0974	1.68553e-11	1.51571e-10	FBgn0036974	eRF1
RS010131	-1.12177	-0.252105	0.297207	-0.00493818	0.0719068	0.292527	4.45681	62.0818	1.69788e-11	1.52593e-10	FBgn0016694	Pdp1
RS004779	-0.388064	0.148932	0.271073	0.229124	0.221861	-0.0800618	7.9728	62.0707	1.70672e-11	1.533e-10	FBgn0004611	Plc21C
RS000727	-0.486128	-0.0406164	-0.00814723	0.272257	-0.0199072	-0.00773618	5.46354	62.065	1.71133e-11	1.53625e-10	FBgn0036271	Pbgs
RS012583	-0.954837	-0.0976932	0.306977	0.331769	0.1996	0.313438	4.56614	61.9784	1.78219e-11	1.59894e-10	NA	NA
RS009342	-0.531265	-0.16664	0.234414	-0.0114644	-0.0615548	0.206903	8.83628	61.9343	1.81948e-11	1.63146e-10	FBgn0035904	CG6776
RS004281	0.358359	-0.16821	-0.07519	-0.0667974	0.0744844	0.120485	5.71448	61.9262	1.82641e-11	1.63673e-10	FBgn0263749	CG43674
RS012330	-0.0624751	-0.170806	-0.842611	-0.587169	-0.553958	0.152202	7.40641	61.8999	1.84899e-11	1.65602e-10	FBgn0016920	nompC
RS000579	0.651296	0.00934021	-0.168019	-0.0790128	-0.0146418	-0.0183942	4.60173	61.8922	1.85575e-11	1.66111e-10	FBgn0029833	CG5941
RS003503	-0.311227	0.0197515	-0.210704	-0.38818	-0.561483	0.140318	6.927	61.8735	1.87201e-11	1.67471e-10	FBgn0038974	CG5377
RS009033	0.775358	-0.38178	0.199599	0.0281279	-0.246724	0.307613	5.92367	61.7501	1.98353e-11	1.77346e-10	FBgn0032287	CG6415
RS003622	-0.351969	0.126567	-0.0258185	0.369688	-0.0148776	-0.0567906	6.06359	61.7259	2.00609e-11	1.7926e-10	FBgn0001313	kl-2
RS009302	3.14419	1.75929	2.8343	1.62554	1.80872	-1.70171	0.448596	61.7095	2.02157e-11	1.8054e-10	FBgn0038405	CG8927
RS004711	3.23627	0.00585103	4.14481	2.38677	2.63996	0.797189	-0.264737	61.6758	2.05377e-11	1.8331e-10	FBgn0039084	CG10175
RS010606	-1.09082	-0.226574	0.160031	0.140664	0.0272418	0.515218	6.32385	61.6405	2.0881e-11	1.8624e-10	FBgn0015039	Cyp9b2
RS000995	-0.574614	-0.164177	-0.165487	-0.0136171	0.0687698	0.13034	5.34903	61.6395	2.08899e-11	1.8624e-10	FBgn0030887	CG6867
RS007733	-0.550895	-0.0612731	0.174202	0.0406928	0.0279864	0.218329	6.53914	61.6143	2.1138e-11	1.88345e-10	FBgn0001291	Jra
RS000663	0.432294	-0.0279469	0.111302	0.102281	0.025132	-0.00206939	6.27025	61.6067	2.12134e-11	1.88909e-10	FBgn0032397	Tom70
RS007335	0.453477	-0.10637	-0.10456	-0.0220165	-0.0122003	0.0641793	6.0308	61.5706	2.15762e-11	1.9203e-10	FBgn0036512	CG16979
RS005409	3.37903	0.686484	-1.94607	-1.98653	0.10575	-0.967592	4.94392	61.5546	2.17382e-11	1.93361e-10	FBgn0053126	NLaz
RS000704	-0.27051	0.0563208	0.172611	0.195572	0.251273	-0.0806384	6.65897	61.5424	2.18632e-11	1.94362e-10	FBgn0261041	stj
RS000400	-0.716701	-0.143052	0.31021	0.291074	0.294339	0.213439	4.85525	61.5391	2.18968e-11	1.94549e-10	FBgn0261244	inaE
RS004500	-0.538373	0.0961835	0.364035	0.0759839	0.378975	-0.00929252	4.78243	61.4598	2.27254e-11	2.01797e-10	FBgn0053512	dpr4
RS006072	-0.4506	-0.0819056	0.272014	0.162173	0.158731	0.125446	6.03351	61.446	2.28733e-11	2.02994e-10	FBgn0031187	CG14619
RS008082	0.422785	-0.040428	-0.0287689	0.129793	0.0319548	0.0110632	6.44983	61.4402	2.29355e-11	2.0343e-10	FBgn0028690	Rpn5
RS008368	-1.05572	-0.219771	0.0796868	-0.387555	-0.388968	0.531188	5.39523	61.4232	2.31181e-11	2.04933e-10	FBgn0032008	CG14277
RS005462	1.53713	-0.195549	0.256295	-0.312482	-0.566778	0.298445	1.74441	61.3999	2.33727e-11	2.07073e-10	FBgn0033809	CG4630
RS014009	5.19919	0.855254	3.55877	3.86368	3.19007	-2.24262	1.56077	61.3785	2.36074e-11	2.09033e-10	NA	NA
RS009623	0.833071	0.203006	0.0440113	0.0178043	0.357398	-0.132988	3.93645	61.3241	2.42176e-11	2.14314e-10	FBgn0032536	Ance-3
RS001374	3.08852	1.40087	4.28802	2.95785	2.95863	-2.44104	0.140416	61.2053	2.56023e-11	2.2644e-10	FBgn0034045	CG8249
RS003271	-0.280086	0.0894115	0.0931437	0.131679	0.149816	0.0444493	8.14149	61.1567	2.61928e-11	2.31531e-10	FBgn0051211	CG31211
RS015374	-0.396907	-0.0570623	0.0208679	-0.0277138	-0.0700305	0.10155	7.25499	61.148	2.62999e-11	2.32346e-10	FBgn0035710	SP1173
RS000842	-1.58224	0.397557	0.249413	0.00371729	0.0215949	0.200373	1.74807	61.0517	2.75121e-11	2.42917e-10	FBgn0011576	Cyp4d2
RS014518	-0.300969	0.112065	0.390771	-0.0628074	0.585781	0.10456	4.84249	61.0449	2.76005e-11	2.4356e-10	FBgn0037633	CG9839
RS010241	0.445128	0.036536	0.253478	0.243769	0.171657	0.124739	9.43778	61.0398	2.76666e-11	2.44005e-10	FBgn0042137	CG18814
RS003529	0.586431	0.0638784	-0.0214579	0.058167	0.0170238	-0.191446	6.54615	60.9632	2.86763e-11	2.52766e-10	FBgn0051133	Slimp
RS003588	0.809061	0.0254264	-0.273682	0.0606562	-0.27962	-0.0231538	3.8351	60.9294	2.91339e-11	2.56655e-10	FBgn0039407	CG14544
RS007014	-0.521542	-0.0444968	0.194427	0.200465	0.150696	0.196105	6.51957	60.9032	2.94941e-11	2.59682e-10	FBgn0052529	Hers
RS011027	-0.539153	-0.0321947	0.276122	0.180843	0.380185	0.16057	7.81636	60.8825	2.97813e-11	2.62062e-10	FBgn0036862	Gbs-76A
RS006771	0.536919	-0.240663	-0.1263	-0.0958429	-0.11884	0.00724124	5.76265	60.8577	3.01293e-11	2.64975e-10	FBgn0020496	CtBP
RS004523	0.898943	-0.0165471	-0.153243	-0.39738	-0.191023	-0.306296	4.27512	60.8356	3.04423e-11	2.67577e-10	FBgn0020622	Pi3K21B
RS003841	0.66025	0.0886904	-0.314042	-0.259368	-0.0889691	-0.318075	5.19905	60.8301	3.05214e-11	2.6812e-10	FBgn0028468	rtet
RS009074	-1.06727	-0.188103	0.228721	0.15596	0.0710162	0.106068	2.96964	60.8218	3.06402e-11	2.69013e-10	FBgn0030576	CG15890
RS003367	4.22026	1.04858	2.71393	2.85093	2.10934	-2.17414	-0.00545614	60.8205	3.06584e-11	2.6902e-10	NA	NA
RS003048	-0.538552	-0.10475	0.0492168	0.160919	0.117742	0.120793	5.35679	60.8047	3.08856e-11	2.70861e-10	FBgn0263219	Dscam4
RS011534	-0.569818	0.112696	-0.356213	-0.304882	-0.286776	-0.212621	5.49066	60.8011	3.09388e-11	2.71175e-10	FBgn0033679	CG8888
RS009946	-0.655366	0.115859	0.0712131	0.139426	0.0265545	0.119736	5.29349	60.7916	3.10758e-11	2.72223e-10	FBgn0033734	CG8520
RS011048	0.0567298	-0.179746	0.223993	0.0204759	-0.457129	0.16301	6.15367	60.7762	3.13014e-11	2.74045e-10	FBgn0011296	l(2)efl
RS004528	0.401318	0.0344419	0.162848	0.0667382	0.0823554	-0.0665906	7.76788	60.7538	3.16302e-11	2.76769e-10	FBgn0032904	Mtp
RS002238	0.0384236	-0.134511	-0.375414	0.420666	0.153484	0.00706056	4.92151	60.7431	3.17893e-11	2.78004e-10	FBgn0029863	CG3823
RS014088	0.347648	-0.121007	-0.255995	-0.362334	-0.564823	0.388865	8.36456	60.6718	3.28685e-11	2.87282e-10	FBgn0020513	ade5
RS005224	0.631652	-0.0209519	-0.225134	-0.211014	-0.106719	-0.0177338	6.53733	60.5931	3.41018e-11	2.97894e-10	FBgn0011823	Pen
RS006296	0.40448	0.0260877	-0.0755951	-0.0694974	-0.0477627	0.0712756	5.92966	60.5548	3.47185e-11	3.03111e-10	FBgn0011509	SrpRbeta
RS011617	-0.478664	-0.0479795	0.272192	0.238139	0.330766	-0.0177337	5.07517	60.5255	3.51984e-11	3.07129e-10	NA	NA
RS010587	-0.7434	-0.0909966	-0.275181	0.122735	-0.0389122	0.00730252	4.37487	60.4944	3.57146e-11	3.11459e-10	FBgn0086711	mol
RS013479	-0.542155	0.0825202	0.449473	0.0276494	0.0580444	-0.0671952	4.8731	60.492	3.57548e-11	3.11635e-10	FBgn0000024	Ace
RS006267	4.88256	-0.103597	1.28409	3.15875	4.27177	-4.53269	-0.753749	60.4266	3.68654e-11	3.21135e-10	FBgn0029827	CG6048
RS003730	0.276349	0.0257942	-0.0686947	0.0218666	0.0180526	-0.0735103	9.9459	60.3588	3.80541e-11	3.31305e-10	FBgn0003279	RpL4
RS003427	-0.374265	0.02921	0.289252	0.236662	0.227702	0.0214019	6.24947	60.3346	3.84881e-11	3.34896e-10	FBgn0263111	cac
RS012480	0.538564	-0.45101	1.34441	-1.3842	0.861568	0.11853	1.1779	60.2928	3.92477e-11	3.41315e-10	FBgn0038610	CG7675
RS008246	-1.03007	-0.24543	-0.689825	-0.00539989	-0.213925	-0.189675	2.65805	60.2589	3.98757e-11	3.46583e-10	FBgn0033717	CG8839
RS014179	0.0382037	-0.0518412	0.315346	0.528863	-0.577082	0.188836	3.86192	60.2243	4.05271e-11	3.52048e-10	FBgn0034527	CG9945
RS001221	-0.288123	-0.0886258	-0.634277	0.0678803	-0.730478	-0.187446	6.15422	60.2172	4.06618e-11	3.53021e-10	FBgn0005536	Mbs
RS007547	0.442994	-0.041597	0.115225	0.0195267	-0.00818764	0.145578	6.49684	60.1932	4.112e-11	3.56801e-10	FBgn0260934	par-1
RS006105	0.659638	0.00111212	0.100149	0.281677	0.112626	-0.028307	6.86855	60.1893	4.11952e-11	3.57254e-10	NA	NA
RS008934	-0.685827	-0.0596265	0.354275	-0.00651404	0.230131	-0.0747659	4.07533	60.1668	4.16311e-11	3.60834e-10	FBgn0031634	Ir25a
RS013023	0.555845	0.184782	-0.0807595	0.0653632	0.00722834	-0.140374	6.05225	60.0904	4.31456e-11	3.73752e-10	FBgn0035524	CG11583
RS003938	-0.49413	0.075132	0.287895	0.198637	0.0301745	-0.0231812	5.32589	60.0361	4.42567e-11	3.83165e-10	FBgn0263131	CG43373
RS002402	-0.364512	0.00932395	-0.0710413	-0.53018	-0.204088	-0.0872549	7.37241	60.0329	4.43237e-11	3.83531e-10	NA	NA
RS008277	-0.373431	0.0650768	0.0596336	0.0751054	0.0500461	0.0186702	6.61789	60.0032	4.49422e-11	3.88668e-10	FBgn0263846	CG43707
RS004822	-0.647024	-0.287798	1.05529	1.32241	1.19275	0.56798	5.37185	59.9548	4.59726e-11	3.97358e-10	FBgn0033451	CG1665
RS009897	0.500744	0.101097	0.069044	0.175777	0.325203	0.0301519	5.99279	59.9062	4.70291e-11	4.06264e-10	FBgn0023540	CG3630
RS010604	-0.945749	-0.0977131	0.10301	-0.0762016	0.0157272	0.236088	3.95326	59.8757	4.77038e-11	4.11865e-10	FBgn0015040	Cyp9c1
RS000144	0.393457	-0.241407	0.0274459	-0.326346	-0.284276	0.0562337	5.94146	59.874	4.77421e-11	4.11967e-10	FBgn0022702	Cht2
RS003618	1.47703	0.298039	-0.00171915	-0.189644	-0.377608	-0.717026	3.28256	59.8636	4.79743e-11	4.13742e-10	FBgn0262717	Skeletor
RS014840	-0.288051	0.0323708	0.214033	0.13968	0.11591	-0.151842	6.58151	59.7998	4.94277e-11	4.26041e-10	FBgn0262738	norpA
RS008645	-0.0821118	-0.102773	-0.533121	-1.04088	-0.728043	0.110221	3.94763	59.7163	5.13965e-11	4.42766e-10	FBgn0025879	Timp
RS007942	1.42836	0.20449	1.72727	1.1627	1.60175	-1.53406	1.44178	59.6965	5.18746e-11	4.46637e-10	FBgn0036494	Toll-6
RS010325	-0.723585	0.129229	0.116711	0.484531	-0.575084	-1.0383	1.98016	59.686	5.21297e-11	4.48586e-10	FBgn0035099	CG6845
RS013848	-0.312646	0.0033437	-0.230677	-0.212993	-0.312014	-0.0841595	7.06912	59.6223	5.37052e-11	4.61888e-10	FBgn0025456	CREG
RS000039	-0.446756	0.113081	0.126447	0.169214	0.15386	-0.0944677	5.5344	59.5132	5.6518e-11	4.85811e-10	FBgn0259225	Pde1c
RS005215	0.485223	-0.0732104	-0.0861454	-0.0380845	0.034138	-0.0630305	5.79003	59.5022	5.68079e-11	4.88035e-10	FBgn0038597	CG8064
RS000193	-0.55051	0.0751471	0.283708	0.397193	0.403789	0.146333	6.29405	59.4755	5.75212e-11	4.93659e-10	FBgn0030574	CG9413
RS008293	-0.456192	0.0160988	0.0848783	0.0776869	0.0424261	0.140601	6.35738	59.4753	5.7526e-11	4.93659e-10	FBgn0031146	CG15449
RS005072	-0.318976	0.0671846	0.446422	0.312879	0.488176	0.052264	5.49089	59.4723	5.76067e-11	4.9408e-10	FBgn0264386	Ca-alpha1T
RS004242	-0.132941	-0.085659	0.535528	0.520629	0.369798	0.0630304	6.45705	59.4683	5.77157e-11	4.94742e-10	FBgn0037897	CG5270
RS004109	-0.665632	-0.00191292	0.447287	0.352028	0.59395	0.166662	4.07736	59.4192	5.90558e-11	5.05951e-10	NA	NA
RS002983	0.532794	-0.0693415	-0.124582	-0.0436468	-0.040281	0.158228	6.0032	59.3959	5.97021e-11	5.11207e-10	FBgn0037744	CG8417
RS001692	-0.52927	-0.0470581	-0.0586621	-0.00791245	-0.0632986	0.154978	5.6096	59.385	6.00087e-11	5.1355e-10	FBgn0039420	CG6154
RS002791	-0.693239	-0.193251	0.194113	-0.0599003	-0.0359095	0.353288	6.35589	59.3617	6.06659e-11	5.1889e-10	FBgn0053300	Muc30E
RS012784	-0.377074	-0.0735157	-0.067757	0.104808	-0.0801502	0.191621	6.87718	59.3026	6.23645e-11	5.33126e-10	FBgn0026438	Eaat2
RS002665	0.756673	0.0653499	-0.46162	-0.153696	-0.120266	-0.193833	5.49661	59.2958	6.25625e-11	5.34525e-10	FBgn0052190	NUCB1
RS011280	0.898072	0.215004	-0.0971685	0.0903808	0.393279	-0.36494	8.18449	59.2558	6.37427e-11	5.4431e-10	FBgn0004885	tok
RS008170	-0.840397	-0.00935901	0.0555586	-0.0166166	0.0167585	0.155997	3.8986	59.2515	6.38706e-11	5.45103e-10	FBgn0030598	CG9503
RS000516	-0.414194	-0.0461966	-0.235723	-0.0957642	-0.26588	0.0730613	6.02902	59.2236	6.47106e-11	5.5197e-10	FBgn0050022	CG30022
RS011690	-0.848554	-0.224181	0.0681523	-0.0839492	0.00594198	0.427727	5.59242	59.2116	6.5075e-11	5.54775e-10	FBgn0037323	CG2663
RS006662	-0.0583466	0.0150524	0.179972	0.269319	0.332026	0.0930197	9.2701	59.2082	6.51774e-11	5.55344e-10	FBgn0013765	cnn
RS013622	3.44685	-0.720872	2.6784	1.64128	1.65024	-0.776265	3.16591	59.1952	6.55736e-11	5.58415e-10	FBgn0034710	CG3292
RS004454	1.25951	0.27913	-0.791198	-0.771291	-0.378891	-0.42368	3.07936	59.1285	6.76498e-11	5.75781e-10	FBgn0037364	Rab23
RS003273	0.54823	-0.109631	0.53691	0.110528	0.00452035	0.0446925	4.07975	59.1105	6.82224e-11	5.80337e-10	FBgn0031312	Tango14
RS012143	-0.58823	-0.111437	0.306352	0.422267	0.292875	-0.0229449	5.29168	59.0487	7.02216e-11	5.97018e-10	FBgn0031170	CG1718
RS006385	-1.1399	-0.284647	0.272517	0.221243	0.288749	0.569712	3.71902	59.0419	7.04431e-11	5.98574e-10	FBgn0037324	Orco
RS002240	-0.714312	0.00823096	-0.165351	-0.16066	-0.205569	0.120828	4.94253	59.0148	7.13428e-11	6.05889e-10	FBgn0028325	l(1)G0334
RS015463	-1.33954	0.441124	0.360439	-0.138068	-0.473545	-0.0693989	1.63202	58.9989	7.18747e-11	6.10074e-10	NA	NA
RS006019	3.3366	-0.372037	2.47329	1.69253	2.18	-0.954692	1.49675	58.9636	7.30681e-11	6.19866e-10	FBgn0036764	CG5535
RS010302	-0.372934	0.0162023	0.124405	0.143874	0.187475	-0.00703476	7.82695	58.941	7.38452e-11	6.26117e-10	FBgn0050296	RIC-3
RS006505	1.91288	-0.24675	-0.440926	0.0959641	0.120677	0.610994	0.965721	58.9199	7.45752e-11	6.31963e-10	NA	NA
RS013163	0.468008	0.10494	-0.301294	-0.176567	-0.103462	-0.127523	5.73344	58.9187	7.4619e-11	6.3199e-10	FBgn0026196	nop5
RS012772	0.375475	-0.159939	-0.342475	-0.607598	-0.492748	-0.0325119	4.61021	58.8403	7.74024e-11	6.55208e-10	FBgn0037956	CG6959
RS005896	-0.708969	-0.0831295	0.15004	0.0743505	0.15275	0.176283	4.74838	58.783	7.95003e-11	6.72602e-10	NA	NA
RS004158	-0.135693	-0.207706	0.45582	-0.405221	0.282745	0.299582	4.75886	58.7763	7.97502e-11	6.7435e-10	FBgn0017430	Nelf-E
RS015215	-1.00315	0.266739	-0.429807	0.266579	0.272163	-0.35084	2.25933	58.7656	8.01518e-11	6.77378e-10	FBgn0015032	Cyp4c3
RS012758	0.48279	-0.0785184	-0.21495	-0.262871	0.0146202	-0.0300178	5.56571	58.7436	8.09801e-11	6.84008e-10	FBgn0038927	CG6015
RS000777	1.87412	-0.61925	2.07342	2.70795	2.22723	0.340194	0.568517	58.7137	8.21176e-11	6.9324e-10	NA	NA
RS005326	0.478019	-0.0583307	-0.0149096	0.0913619	-0.0254031	0.102681	5.03514	58.6251	8.5588e-11	7.22146e-10	FBgn0036486	Msh6
RS000380	0.668926	-0.0574615	-0.10884	-0.21884	-0.067421	0.171256	4.66162	58.6051	8.63916e-11	7.28532e-10	FBgn0086674	Tango13
RS000405	0.424968	-0.13609	-0.202866	-0.162979	-0.180596	0.0481275	6.49112	58.5952	8.67898e-11	7.31494e-10	FBgn0036624	RAF2
RS013250	-0.644899	0.026732	0.364756	-0.365939	-0.135379	0.152252	10.3091	58.527	8.95983e-11	7.54756e-10	FBgn0033696	Cyp6g2
RS011357	0.261725	-0.0376329	-0.26246	-0.259923	-0.159405	-0.0823701	7.31075	58.4827	9.14718e-11	7.70122e-10	FBgn0003742	tra2
RS009794	1.06296	0.220353	0.125199	-0.0304095	0.137557	-0.423195	4.00968	58.4767	9.17291e-11	7.71872e-10	NA	NA
RS005622	0.47856	0.0645372	-0.0586769	-0.136953	-0.106038	-0.208449	6.12839	58.4411	9.32663e-11	7.84383e-10	FBgn0039240	CG3744
RS003368	-1.125	0.184415	0.554884	-0.0400324	0.24511	-0.0842554	2.26747	58.4136	9.44721e-11	7.94096e-10	NA	NA
RS014278	-0.818767	-0.389745	0.924197	0.404225	0.26968	0.0439862	4.46758	58.3437	9.7605e-11	8.19987e-10	FBgn0039481	Cpr97Eb
RS012099	0.554795	-0.0772314	-0.156389	-0.161024	-0.122736	-0.154917	7.64166	58.3401	9.77724e-11	8.20951e-10	FBgn0002121	l(2)gl
RS014952	0.624863	-0.041924	-0.128898	-0.179037	-0.227968	-0.0829711	6.68893	58.3125	9.90384e-11	8.31133e-10	FBgn0042094	Adk3
RS003522	5.26696	-0.0929438	1.47904	0.830305	0.165895	-1.62812	4.63262	58.2478	1.02076e-10	8.56164e-10	FBgn0039640	CG14516
RS009983	-0.169231	-0.147626	-1.09926	-0.566239	-0.184524	0.191231	3.63408	58.2359	1.02644e-10	8.60465e-10	FBgn0259108	futsch
RS001168	0.496125	-0.108177	-0.381764	-0.49354	-0.374757	-0.0255205	8.06851	58.1763	1.05541e-10	8.84278e-10	FBgn0001149	GstD1
RS005014	-0.598589	-0.0587927	0.480543	0.503229	0.382097	0.235616	5.38054	58.1622	1.06237e-10	8.8963e-10	FBgn0037448	CG15186
RS008266	-1.53685	-0.174978	0.36415	0.257042	0.214617	0.302295	1.93256	58.1555	1.06571e-10	8.91946e-10	FBgn0036839	CG18136
RS001582	5.27734	0.113863	4.20603	2.01999	4.44852	-2.17898	-0.615266	58.153	1.06694e-10	8.92493e-10	FBgn0033629	Tsp47F
RS010681	-0.420157	0.00971242	0.161554	0.185424	0.251716	0.120273	7.38077	58.141	1.07291e-10	8.97012e-10	FBgn0022764	Sin3A
RS013663	1.53237	0.528357	0.517741	0.506249	0.689356	-0.363037	5.31588	58.0562	1.11623e-10	9.32728e-10	FBgn0033981	Cyp6a21
RS003275	0.61139	-0.0591799	-0.230715	-0.278851	-0.355945	0.207966	4.15042	58.0494	1.11979e-10	9.34741e-10	FBgn0019985	mGluRA
RS012878	2.75634	-0.690058	4.79868	4.8829	5.22683	-0.292858	-0.0947062	58.0493	1.11984e-10	9.34741e-10	FBgn0027556	CG4928
RS013257	0.69865	0.0457025	-0.310383	-0.239251	-0.219833	-0.330776	6.21223	58.0396	1.12493e-10	9.38485e-10	FBgn0000454	Dip-B
RS010668	-0.363023	0.162329	0.245048	0.293742	0.359882	-0.0140469	5.47189	58.0297	1.13013e-10	9.42319e-10	NA	NA
RS013976	0.657641	0.0291064	0.00380131	0.092743	0.0228317	0.0848367	4.95095	58.0088	1.14121e-10	9.51048e-10	FBgn0033351	CG8235
RS004180	0.487105	-0.0179636	-0.198238	-0.166984	-0.0146883	-0.044456	5.69989	57.9789	1.15727e-10	9.63916e-10	FBgn0032859	Arc-p34
RS001364	5.37064	0.0136456	3.19014	3.01555	2.5798	-0.513529	-0.330426	57.9772	1.1582e-10	9.64178e-10	FBgn0035670	CG10472
RS013812	0.221152	-0.00164264	0.394687	0.282788	0.0286794	0.154743	6.16264	57.8726	1.21614e-10	1.01187e-09	FBgn0042083	CG3267
RS008160	-1.1597	-0.120976	0.555654	0.560954	0.328509	0.572452	3.2555	57.7677	1.27715e-10	1.06206e-09	FBgn0034605	CG15661
RS003126	-0.478053	0.072863	-0.0896585	-0.463987	-0.593728	0.217302	7.33603	57.6136	1.3723e-10	1.14058e-09	FBgn0035325	CG13806
RS002507	1.50709	0.322412	-0.392265	-1.19075	-0.0498696	-0.629824	2.24934	57.5562	1.40955e-10	1.17092e-09	FBgn0033845	mars
RS002591	-0.324229	0.0112684	0.0189419	-0.107417	-0.150206	0.0186591	8.23576	57.5249	1.43029e-10	1.18751e-09	FBgn0261439	SdhA
RS009576	-0.756962	0.282264	0.0358077	0.16616	0.330665	-0.110591	3.95405	57.4205	1.50166e-10	1.24611e-09	FBgn0011746	ana
RS010849	0.221958	0.269228	0.652441	0.574806	0.282743	-0.0618287	8.35833	57.4087	1.50996e-10	1.25233e-09	FBgn0038074	CG6188
RS011455	-0.361329	-0.0572593	-0.113473	-0.0438756	-0.107936	0.069379	7.19631	57.4024	1.51436e-10	1.25531e-09	FBgn0032421	crok
RS002582	-0.622562	0.090717	0.0348206	0.103387	-0.0454699	0.0124905	7.79967	57.3899	1.52325e-10	1.26201e-09	FBgn0038674	CG14285
RS011904	2.8879	0.013374	2.06079	1.22457	1.5185	-1.51991	2.42516	57.3849	1.52678e-10	1.26426e-09	FBgn0015336	CG15865
RS000137	5.38615	3.67895	-0.135881	0.270096	0.542064	-2.78514	0.23238	57.3118	1.57978e-10	1.30745e-09	FBgn0038309	CG6499
RS003639	-0.736013	-0.172852	0.351227	0.411323	0.347989	0.392239	9.61007	57.2927	1.59385e-10	1.31839e-09	FBgn0043841	vir-1
RS000321	-0.650779	-0.155114	-0.403102	-0.267063	-0.18499	0.0521401	6.009	57.225	1.64496e-10	1.35995e-09	FBgn0037788	CG3940
RS005556	0.46226	-0.0475264	0.104295	0.0548875	0.0465108	0.118338	5.54025	57.212	1.65501e-10	1.36754e-09	FBgn0032849	mRpS18B
RS003336	0.496841	0.200793	-0.312631	-0.495185	-0.477172	-0.280416	5.50069	57.2027	1.66222e-10	1.37276e-09	FBgn0003016	osp
RS002091	0.308414	-0.0213712	0.0124076	-0.0604992	-0.0161947	0.055577	7.08004	57.1742	1.68444e-10	1.39037e-09	FBgn0027094	Aats-ala
RS004057	-0.964627	0.340831	1.00369	0.732657	0.657942	-0.0808851	2.53164	57.1576	1.69747e-10	1.40039e-09	NA	NA
RS015053	1.42191	-1.04383	-0.080045	0.174392	0.92871	1.0792	2.68449	57.1273	1.72166e-10	1.4196e-09	FBgn0022700	Cht4
RS008707	0.439753	0.0476829	-0.105332	-0.0259135	0.0221565	-0.105566	6.49456	57.0509	1.78405e-10	1.47026e-09	FBgn0052676	CG32676
RS010271	1.32105	0.0683531	0.362978	0.564215	0.585122	-0.108869	2.18371	57.0078	1.82032e-10	1.49935e-09	NA	NA
RS001057	0.589364	-0.000423386	-0.181914	-0.22778	-0.224349	-0.101486	7.83154	56.9689	1.85359e-10	1.52595e-09	FBgn0004227	nonA
RS010566	-0.0216846	0.00619469	2.3079	2.43348	1.88764	0.273169	2.06082	56.9359	1.88236e-10	1.54882e-09	NA	NA
RS007456	-0.294435	-0.142642	0.316289	0.151184	0.171979	0.167685	9.08777	56.9262	1.89088e-10	1.55501e-09	FBgn0261788	Ank2
RS003083	1.71907	-0.375748	2.63541	1.87622	1.99374	-0.258268	0.730043	56.9221	1.8945e-10	1.55717e-09	FBgn0028888	CG4168
RS005903	0.304907	-0.0724822	0.157238	0.0995658	0.0276999	0.0730948	6.77266	56.916	1.89987e-10	1.56076e-09	FBgn0039296	CG10420
RS014628	-0.750748	0.0824163	0.261097	0.327726	0.207923	0.237738	4.66711	56.889	1.92397e-10	1.57972e-09	FBgn0040056	CG17698
RS005755	-0.569612	-0.0637653	0.759457	0.619104	0.208171	-0.0278948	3.51713	56.8839	1.92848e-10	1.58259e-09	FBgn0004880	scrt
RS002506	0.880057	0.0362757	0.345155	-0.553868	0.278548	-0.295235	2.99477	56.856	1.95379e-10	1.60252e-09	NA	NA
RS000642	-1.71075	-0.485893	0.751112	0.730483	-0.0169711	0.828429	1.61167	56.8164	1.99017e-10	1.6315e-09	NA	NA
RS013823	-0.367207	0.0674036	-0.0812377	-0.0290767	0.141028	0.10014	7.35467	56.7587	2.04436e-10	1.67505e-09	FBgn0030600	hiw
RS008007	-0.622976	0.0978849	0.0987278	0.0401931	0.167339	0.0403505	5.53856	56.7441	2.05837e-10	1.68563e-09	FBgn0038295	Gyc88E
RS004554	2.99309	0.329406	2.47951	2.13746	1.92218	0.32034	0.111535	56.6838	2.11696e-10	1.73271e-09	FBgn0036879	Cpr76Bb
RS004513	0.530309	-0.0810767	-0.036814	0.0773736	0.00867889	0.0705462	5.36603	56.6706	2.13006e-10	1.74252e-09	FBgn0010770	ppan
RS015009	0.764363	0.108922	0.0462245	0.0959525	0.0831621	-0.180399	5.47869	56.6562	2.14438e-10	1.75331e-09	FBgn0263852	l(2)k12914
RS009142	5.331	0.130105	4.54633	2.87339	3.83039	-2.24048	-0.589692	56.6489	2.15174e-10	1.7584e-09	FBgn0036203	Muc68D
RS004529	-0.0641393	0.157175	-0.145386	0.0863869	0.0132604	-0.183776	8.91988	56.624	2.17677e-10	1.77792e-09	FBgn0020309	crol
RS012719	0.510555	-0.213506	0.0202342	-0.399272	-0.14114	0.207208	4.20528	56.537	2.26688e-10	1.85055e-09	FBgn0031473	CG3104
RS003128	-0.675999	-0.0836139	-0.130343	-0.557929	-0.0130107	0.16781	4.19578	56.535	2.26894e-10	1.85127e-09	FBgn0023095	caps
RS004839	2.15391	0.0869548	1.53329	1.4719	1.0221	-1.24199	3.30693	56.4613	2.34818e-10	1.91492e-09	FBgn0052056	scramb1
RS008159	-1.24204	-0.524176	0.549304	0.505303	0.594111	0.506499	2.41647	56.4551	2.355e-10	1.91947e-09	FBgn0040257	Ugt86Dc
RS000838	-0.31734	0.0316926	-0.0232899	-0.0430833	-0.0638125	-0.0358895	6.69672	56.4475	2.3634e-10	1.92487e-09	FBgn0011481	Ssdp
RS004595	0.343371	-0.0971469	-0.094264	-0.00994202	-0.0180588	0.10765	6.84585	56.4468	2.36409e-10	1.92487e-09	FBgn0004584	Rrp1
RS010132	-1.08356	-0.119113	0.233341	-0.0292395	0.0444721	0.334739	3.73848	56.4297	2.38309e-10	1.93933e-09	NA	NA
RS011571	-0.526465	-0.185062	-0.295248	-0.465747	-0.785003	0.307905	9.55432	56.4106	2.40437e-10	1.95562e-09	FBgn0034157	resilin
RS011779	-0.704316	0.145656	0.122073	-0.179559	-0.354493	0.0446139	5.37621	56.4062	2.40926e-10	1.95787e-09	FBgn0034909	CG4797
RS014242	0.487309	-0.0402992	0.0132615	0.122495	-0.0600343	0.213795	4.98805	56.4059	2.40965e-10	1.95787e-09	FBgn0020299	stumps
RS015081	0.513365	-0.106466	0.267535	-0.37706	-0.189991	0.301492	3.87542	56.3612	2.4603e-10	1.99798e-09	NA	NA
RS005188	0.527634	-0.0994461	-0.236256	-0.101176	-0.0282075	0.0326824	5.93258	56.3333	2.4925e-10	2.02308e-09	FBgn0032925	CG9246
RS010822	0.440642	0.0379382	-0.0172471	0.0388736	-0.00408967	0.00977895	8.14285	56.305	2.52556e-10	2.04885e-09	FBgn0034138	RpS15
RS008823	-0.277456	-0.0863257	0.977498	0.997413	0.825443	0.0304373	3.91776	56.2782	2.55726e-10	2.07348e-09	NA	NA
RS009312	0.753265	0.149464	-0.284275	-0.17492	-0.192643	-0.229631	4.14026	56.1596	2.70249e-10	2.1901e-09	NA	NA
RS005274	0.593244	-0.0256533	0.0794198	0.0029092	0.0707541	0.0485394	4.98928	56.15	2.71454e-10	2.19872e-09	FBgn0022288	l(2)09851
RS002028	0.475371	0.0544894	-0.130039	-0.136161	-0.0384463	-0.203641	8.30755	56.1064	2.77024e-10	2.24267e-09	FBgn0010488	NAT1
RS009611	-1.4135	-0.511454	0.343106	-0.264917	-0.669003	0.484948	2.18032	56.1034	2.7741e-10	2.24463e-09	NA	NA
RS002667	0.824217	0.233324	-0.360894	-0.354676	-0.221702	-0.258321	5.22481	56.0776	2.80762e-10	2.27057e-09	FBgn0013269	FK506-bp1
RS007453	0.338933	-0.0667286	-0.0413234	-0.148044	-0.297394	0.104065	5.65033	56.0517	2.84173e-10	2.29696e-09	FBgn0038326	CG5044
RS005962	-0.395213	-0.0121606	0.232535	0.149989	0.160174	0.0606783	7.83286	56.0141	2.89186e-10	2.33628e-09	FBgn0032129	jp
RS002001	-1.39457	-0.0284357	0.409704	0.235376	0.0972782	0.63105	6.9812	55.9964	2.91581e-10	2.35441e-09	NA	NA
RS013874	0.649441	0.0723449	-0.233538	-0.0515846	-0.113045	-0.0652573	5.8566	55.9886	2.92641e-10	2.36174e-09	FBgn0031479	Prx6005
RS001343	-1.12843	-0.0379567	0.348363	0.282835	0.728885	0.0075011	2.28846	55.9689	2.95336e-10	2.38226e-09	FBgn0040030	CG2893
RS006427	0.263493	-0.106025	0.081133	0.0870705	0.0556937	0.0171271	7.78835	55.9485	2.98156e-10	2.40376e-09	FBgn0262126	gho
RS015087	-0.436107	0.203388	0.348454	0.541212	0.337363	0.0415504	4.74042	55.9379	2.99636e-10	2.41444e-09	NA	NA
RS007383	1.34843	0.32491	-0.557515	-0.329759	0.147796	-0.534055	4.25084	55.921	3.01995e-10	2.43219e-09	FBgn0032230	lft
RS006407	0.81887	0.174015	-0.327321	-0.354361	-0.224626	-0.383192	4.03976	55.9104	3.03491e-10	2.44298e-09	NA	NA
RS011587	3.27594	0.763179	-0.628777	-2.21129	0.570634	-1.50888	6.43774	55.8913	3.06203e-10	2.46353e-09	FBgn0000299	Cg25C
RS007095	0.167662	-0.0657922	-0.08471	-0.078581	-0.113317	0.0422504	9.04769	55.8348	3.14365e-10	2.5279e-09	FBgn0014075	Ugt
RS009666	-0.724506	0.0701702	0.422072	0.0153182	0.0979567	-0.140676	4.12369	55.7777	3.22834e-10	2.59466e-09	FBgn0036227	CG17826
RS001567	0.899945	0.0410207	-0.49539	-0.64846	-0.273047	-0.121102	3.13418	55.7413	3.28347e-10	2.63761e-09	FBgn0034417	CG15117
RS015404	0.434843	0.0670301	-0.1322	0.0744024	-0.0747486	0.0543109	6.21829	55.7162	3.3221e-10	2.66727e-09	FBgn0015777	nrv2
RS002770	0.373655	-0.0588621	0.0405287	0.110609	0.0918707	0.142172	9.87841	55.6207	3.47296e-10	2.78695e-09	FBgn0001092	Gapdh2
RS011412	-0.946359	0.131258	0.319181	0.338809	0.310609	0.0304734	3.22358	55.6133	3.48493e-10	2.79512e-09	NA	NA
RS004134	0.628275	0.0915809	-0.0529865	-0.302238	-0.230359	-0.046084	6.14762	55.582	3.53615e-10	2.83474e-09	FBgn0011703	RnrL
RS000549	0.670242	0.0676425	0.03358	-0.0796691	0.107628	-0.200686	5.15545	55.5271	3.62771e-10	2.90664e-09	FBgn0038306	Art3
RS008123	0.956598	0.0728784	-0.10879	-0.107846	-0.420989	-0.207725	4.18882	55.5037	3.66737e-10	2.93691e-09	FBgn0050045	Cpr49Aa
RS008596	0.358541	-0.108604	-0.0513459	0.0372387	-0.00378106	0.0911706	7.27346	55.5013	3.67148e-10	2.93869e-09	FBgn0008635	betaCop
RS011327	0.916288	-0.21779	0.732769	0.183292	0.0431074	0.582947	3.98696	55.4673	3.72998e-10	2.98399e-09	FBgn0034145	CG5065
RS010536	0.437615	-0.0410517	-0.0727606	0.0350454	-0.0760372	0.0311235	6.47967	55.4441	3.77039e-10	3.01476e-09	FBgn0260049	flr
RS011814	1.41153	0.0434788	-0.176473	-0.174369	-0.195556	-0.4285	2.38396	55.433	3.78994e-10	3.02884e-09	NA	NA
RS004824	0.392749	-0.097889	0.0890093	0.0221382	-0.0425426	0.143751	6.38898	55.4157	3.82067e-10	3.05184e-09	FBgn0032015	CG7830
RS007130	-0.628636	-0.100157	-0.0317289	0.0567018	-0.0836705	0.263253	5.6885	55.3858	3.87414e-10	3.09296e-09	FBgn0016054	phr6-4
RS009969	-1.64886	0.0679241	1.28062	0.860309	0.70585	-0.631736	1.83146	55.3515	3.93636e-10	3.14103e-09	FBgn0035476	CG12766
RS010867	-0.483355	-0.139209	-0.077398	-0.0472685	-0.211795	0.253475	7.08946	55.3412	3.95539e-10	3.1546e-09	FBgn0043070	MESK2
RS011582	-0.537974	-0.202796	0.220163	0.136006	0.038751	0.187192	6.03531	55.3324	3.97159e-10	3.16589e-09	FBgn0022800	Cad96Ca
RS003258	0.0645184	0.0257782	-0.40068	0.61355	-0.315613	-0.0303549	3.4593	55.3011	4.02981e-10	3.20958e-09	FBgn0031361	CG17652
RS009203	-0.534934	-0.0635305	0.0501622	0.100324	0.0511341	0.166846	5.95207	55.3007	4.03051e-10	3.20958e-09	FBgn0000250	cact
RS000127	0.272001	0.00865935	-0.0212797	0.048062	0.0153931	0.00539706	7.63161	55.249	4.1286e-10	3.28601e-09	FBgn0025117	und
RS012129	0.515318	-0.378282	-0.991939	-0.998312	-0.781028	-0.134581	2.75349	55.245	4.13642e-10	3.29055e-09	FBgn0040397	CG3655
RS013592	-0.954964	-0.265977	0.854421	0.537207	0.303303	-0.0609225	3.87052	55.2438	4.13861e-10	3.29061e-09	FBgn0003410	sina
RS004551	1.38279	-1.23772	-0.190015	-0.401895	-0.206878	1.20163	1.1317	55.2231	4.17877e-10	3.32085e-09	FBgn0259713	CG42367
RS002647	-0.432967	-0.031407	0.337417	0.367837	0.322146	0.0134802	6.98754	55.205	4.21401e-10	3.34715e-09	FBgn0261788	Ank2
RS004600	4.36609	0.23095	1.75442	1.45153	0.901607	-1.82348	4.3496	55.1969	4.22995e-10	3.3581e-09	FBgn0051439	Muc96D
RS006447	-0.408938	-0.111517	-0.059849	-0.0577304	-0.0574708	0.0812868	7.95894	55.1917	4.24021e-10	3.36453e-09	FBgn0053113	Rtnl1
RS011124	5.04267	0.204307	5.04447	2.30621	3.60838	-0.908372	-0.614753	55.1607	4.30163e-10	3.41153e-09	FBgn0032479	CG16974
RS002805	0.532747	0.0703511	-0.105802	-0.0121073	0.123354	-0.147339	5.40992	55.1578	4.30753e-10	3.41447e-09	FBgn0033089	CG17266
RS010261	0.647512	0.039872	0.30639	0.332279	0.394264	0.00125072	5.87497	55.1491	4.32498e-10	3.42656e-09	FBgn0035338	CG13800
RS003217	3.67428	-1.71036	4.19909	3.67695	4.58096	-0.150086	-0.465967	55.1395	4.34438e-10	3.44018e-09	NA	NA
RS001164	0.443591	0.0934084	-0.208766	-0.291342	-0.147901	-0.0221669	6.04047	55.1262	4.3714e-10	3.45982e-09	FBgn0033378	tsu
RS007811	0.492952	0.186667	-0.430978	-0.320199	-0.625803	-0.256841	4.64447	55.1131	4.39798e-10	3.4791e-09	NA	NA
RS013041	-0.277341	0.133177	0.0228871	0.16151	0.186678	0.00165705	6.91882	55.0887	4.44819e-10	3.51703e-09	FBgn0027103	sec10
RS010157	0.337451	-0.141665	-0.027717	-0.213679	-0.151524	0.123799	5.6813	55.0122	4.6093e-10	3.64256e-09	NA	NA
RS014319	0.228337	-0.0539942	0.191518	0.155966	0.189605	0.252591	7.94969	55.0008	4.63382e-10	3.66009e-09	FBgn0000568	Eip75B
RS013952	0.369693	-0.0932284	0.00311178	-0.0762682	-0.102287	0.0603833	6.19576	54.9946	4.64711e-10	3.66872e-09	FBgn0033916	CG8494
RS006422	-0.435488	-0.0967305	-0.03305	-0.0178465	-0.111081	-0.0428889	5.90578	54.9171	4.81753e-10	3.80134e-09	FBgn0029881	pigs
RS000543	0.39806	0.0383957	0.29278	0.0721157	0.173432	-0.0921362	6.16943	54.8945	4.86845e-10	3.83957e-09	FBgn0033431	CG1827
RS008630	0.198311	0.0804042	0.0934921	0.653899	0.505107	0.0436747	5.78481	54.8795	4.90259e-10	3.86454e-09	FBgn0038840	CG5621
RS008922	-0.331049	0.035486	-0.0624702	-0.101661	-0.380799	0.106169	6.83645	54.8287	5.01978e-10	3.95492e-09	FBgn0038924	CG6028
RS011494	0.0844011	-0.221824	-0.192307	-0.332252	-0.209956	0.162362	7.45049	54.7869	5.11818e-10	4.0304e-09	FBgn0261800	LanB1
RS011063	0.486669	0.120115	-0.118557	0.0257848	0.057293	-0.127068	6.97844	54.7832	5.12705e-10	4.03535e-09	FBgn0034657	LBR
RS000159	-0.437854	-0.155715	0.176408	0.133545	0.000263201	0.201294	7.52492	54.6939	5.34421e-10	4.20415e-09	FBgn0029092	ced-6
RS010148	0.648482	0.0249234	0.029557	-0.0411149	-0.0298674	-0.0648619	6.01239	54.6355	5.4914e-10	4.31776e-09	FBgn0013749	Arf102F
RS012906	-1.05305	-0.0150327	0.609663	0.477878	0.846648	0.248991	3.57226	54.628	5.51059e-10	4.33066e-09	NA	NA
RS009391	-0.248057	-0.0689015	0.154717	0.0551933	0.0768527	0.0279269	7.47483	54.6003	5.58194e-10	4.38452e-09	FBgn0040234	c12.2
RS000866	-0.434409	-0.0396863	0.0871975	0.0415509	0.0567709	0.153572	9.24054	54.5787	5.63837e-10	4.42662e-09	FBgn0002921	Atpalpha
RS005290	0.40583	0.000206911	-0.0654498	-0.053797	0.0539044	-0.111429	6.96716	54.5633	5.67867e-10	4.45601e-09	FBgn0002183	dre4
RS003686	-0.538154	0.223079	0.229514	0.294773	0.43582	-0.163706	4.27553	54.5418	5.7358e-10	4.49857e-09	FBgn0037726	CG9492
RS002646	-0.576258	0.0744701	0.186127	0.305641	0.307116	-0.103228	6.17464	54.4964	5.85794e-10	4.58977e-09	NA	NA
RS002203	-0.970366	-0.201943	-0.193337	0.256615	-0.0164226	0.370751	3.41099	54.4964	5.85797e-10	4.58977e-09	FBgn0052091	CG32091
RS005951	3.18917	-0.00552703	1.22837	0.782808	0.663899	-1.31431	5.97389	54.3932	6.14589e-10	4.81144e-09	FBgn0003187	qua
RS000922	0.267612	0.117985	0.10789	0.127228	0.184043	0.109818	7.95746	54.3927	6.14706e-10	4.81144e-09	FBgn0013984	InR
RS008344	0.901439	-0.0932002	-0.237955	-0.0238791	-0.00645423	-0.0179263	4.76597	54.3902	6.1542e-10	4.81461e-09	FBgn0261933	SmD1
RS015510	-0.520626	-0.0260914	0.0351462	-0.128065	-0.558508	0.0678407	4.62907	54.3329	6.32046e-10	4.9422e-09	NA	NA
RS010704	0.739036	-0.124489	-0.194006	0.00034093	-0.0537715	0.0293875	4.03687	54.2471	6.57726e-10	5.14043e-09	FBgn0034362	CG5323
RS014883	-0.411263	0.0973056	0.0631214	0.199759	0.128837	0.00239838	5.5396	54.1904	6.75289e-10	5.27504e-09	FBgn0261046	Dscam3
RS012394	0.689952	0.00769292	-0.231665	-0.169579	-0.155929	-0.0748123	6.18747	54.1864	6.76551e-10	5.28225e-09	FBgn0261609	eIF-2alpha
RS000163	-0.694042	0.20558	0.0780423	0.0899156	0.0144601	-0.0527031	3.80775	54.1798	6.78619e-10	5.29574e-09	NA	NA
RS001568	-0.763775	-0.00138467	0.229013	0.279017	0.0237147	-0.0352772	4.89087	54.1695	6.81869e-10	5.31844e-09	FBgn0034417	CG15117
[truncated: 4,240 more rows]
